# Supplementary material for: A poised fragment library enables rapid synthetic expansion yielding the first reported inhibitors of PHIP(2), an atypical bromodomain
Source: Royal Society of Chemistry journal article supplement (doi:10.1039/c5sc03115j), 2015-12-22

# Compound 1

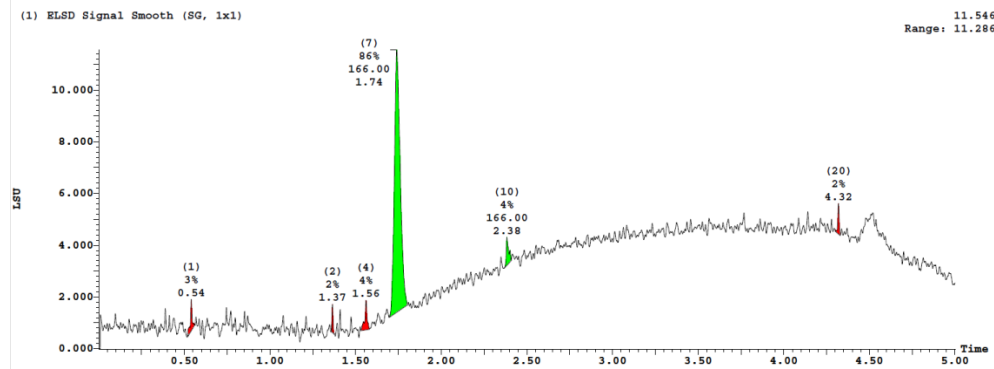

|                        |                      |                        |           |                      |                                                                                  |
|------------------------|----------------------|------------------------|-----------|----------------------|----------------------------------------------------------------------------------|
| Acquisition Time (sec) | 4.0894               | Comment                | OC 032 H1 | Date                 | 11 Jul 2014 05:01:04                                                             |
| Date Stamp             | 11 Jul 2014 05:01:04 | Nucleus                | 1H        | File Name            | \\hestia\work\chemistry\NMR Files\NMR_data\OCox\140710_OC_001-032\12 H1\data\11r |
| Frequency (MHz)        | 400.13               | Owner                  | sqcmmr    | Number of Transients | 16                                                                               |
| Original Points Count  | 32768                | SW (Hz)                | 8012.82   | Points Count         | 65536                                                                            |
| Receiver Gain          | 194.71               | Solvent                | DMSO-d6   | Pulse Sequence       | zgpg30                                                                           |
| Spectrum Type          | STANDARD             | Sweep Width (Hz)       | 8012.70   | Spectrum Offset (Hz) | 2467.8220                                                                        |
|                        |                      | Temperature (degree C) | 25.154    |                      |                                                                                  |

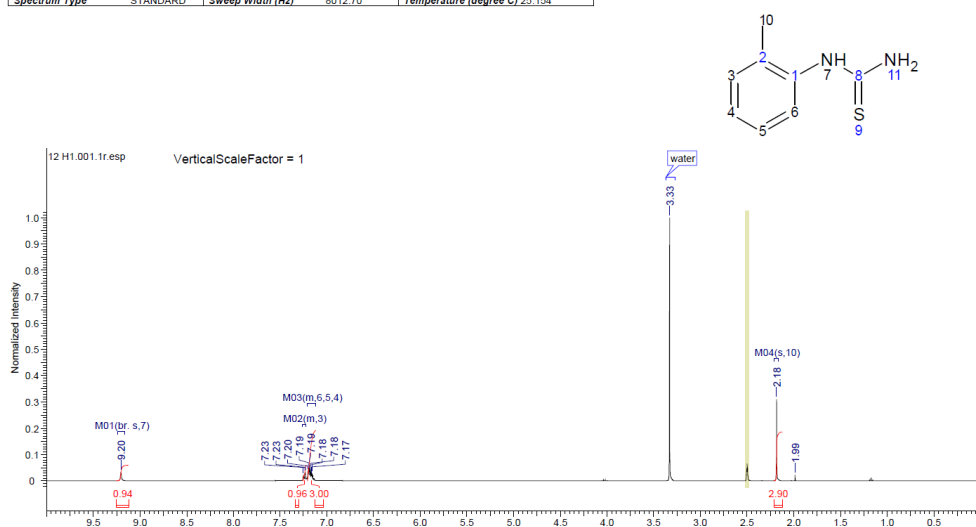

|                        |                      |                        |            |                      |                                                                                   |
|------------------------|----------------------|------------------------|------------|----------------------|-----------------------------------------------------------------------------------|
| Acquisition Time (sec) | 1.3631               | Comment                | OC 032 C13 | Date                 | 11 Jul 2014 04:39:44                                                              |
| Date Stamp             | 11 Jul 2014 04:39:44 | Nucleus                | 13C        | File Name            | \\hestia\work\chemistry\NMR Files\NMR_data\OCox\140710_OC_001-032\10 C13\data\11r |
| Frequency (MHz)        | 100.61               | Owner                  | sqcmmr     | Number of Transients | 1024                                                                              |
| Original Points Count  | 32768                | SW (Hz)                | 24038.46   | Points Count         | 32768                                                                             |
| Receiver Gain          | 194.71               | Solvent                | DMSO-d6    | Pulse Sequence       | zgpg30                                                                            |
| Spectrum Type          | STANDARD             | Sweep Width (Hz)       | 24037.73   | Spectrum Offset (Hz) | 10059.8594                                                                        |
|                        |                      | Temperature (degree C) | 25.159     |                      |                                                                                   |

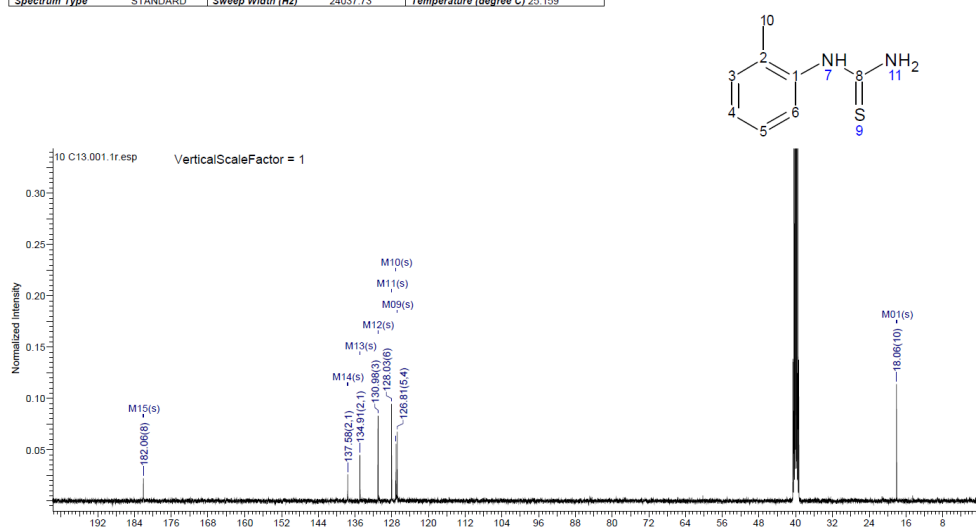

# Compound 2

(1) ELSD Signal Smooth (8G, 1x1)

67.940  
Range: 67.937

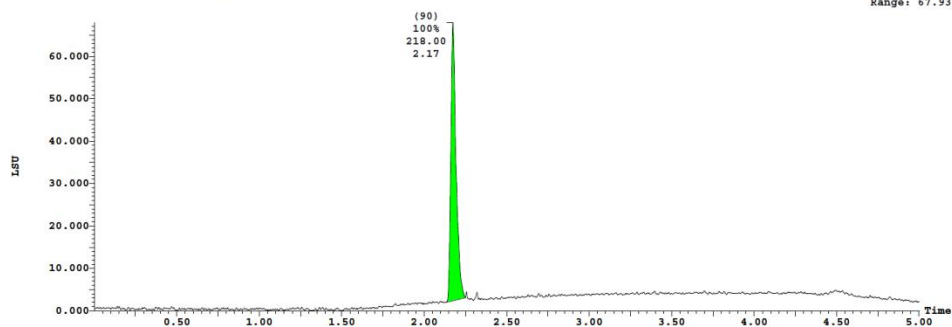

|                        |                      |                        |                                                                                |                      |                      |
|------------------------|----------------------|------------------------|--------------------------------------------------------------------------------|----------------------|----------------------|
| Acquisition Time (sec) | 4.0894               | Comment                | OC_028_H1                                                                      | Date                 | 12 Jul 2014 05:50:08 |
| Date Stamp             | 12 Jul 2014 05:50:08 | File Name              | Vhesla\work\chemistry\NMR Files\NMR_data\OCox140710_OC_001-028\12_H1\data\111r |                      |                      |
| Frequency (MHz)        | 400.13               | Nucleus                | <sup>1</sup> H                                                                 | Number of Transients | 16                   |
| Original Points Count  | 32768                | Owner                  | sacnmr                                                                         | Points Count         | 65536                |
| Receiver Gain          | 194.71               | SW(cyclical) (Hz)      | 8012.82                                                                        | Pulse Sequence       | zgpg30               |
| Spectrum Type          | STANDARD             | Sweep Width (Hz)       | 8012.70                                                                        | Solvent              | DMSO-d6              |
|                        |                      | Temperature (degree C) | 25.155                                                                         | Spectrum Offset (Hz) | 2467.8220            |

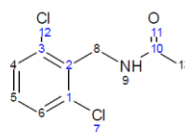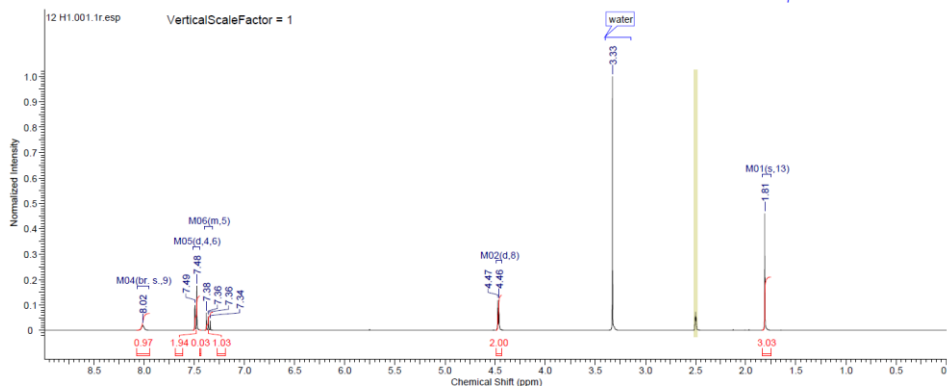

|                        |                      |                        |                                                                                 |                      |                      |
|------------------------|----------------------|------------------------|---------------------------------------------------------------------------------|----------------------|----------------------|
| Acquisition Time (sec) | 1.3631               | Comment                | OC_028_C13                                                                      | Date                 | 12 Jul 2014 05:28:48 |
| Date Stamp             | 12 Jul 2014 05:28:48 | File Name              | Vhesla\work\chemistry\NMR Files\NMR_data\OCox140710_OC_001-028\10_C13\data\111r |                      |                      |
| Frequency (MHz)        | 100.61               | Nucleus                | <sup>13</sup> C                                                                 | Number of Transients | 1024                 |
| Original Points Count  | 32768                | Owner                  | sgcnmr                                                                          | Points Count         | 32768                |
| Receiver Gain          | 194.71               | SW(cyclical) (Hz)      | 24038.46                                                                        | Pulse Sequence       | zgpg30               |
| Spectrum Type          | STANDARD             | Sweep Width (Hz)       | 24037.73                                                                        | Solvent              | DMSO-d6              |
|                        |                      | Temperature (degree C) | 25.160                                                                          | Spectrum Offset (Hz) | 10059.8594           |

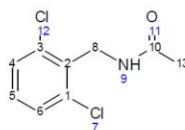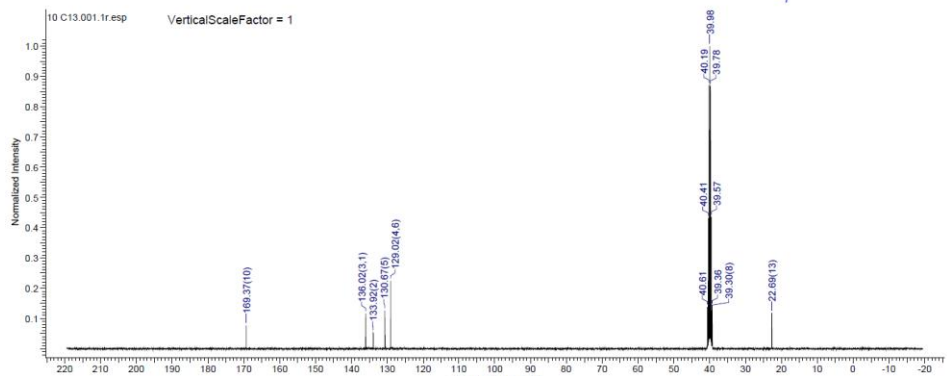

3S(2A/2A288\_1H)

N#Cc1nc(Cc2ccccc2)oc1N

3

13.0 12.0 11.0 10.0 9.0 8.0 7.0 6.0 5.0 4.0 3.0 2.0 1.0 0

7.630  
7.616  
7.587

5.10

1.00

3.555

3.549

2.500

18.21

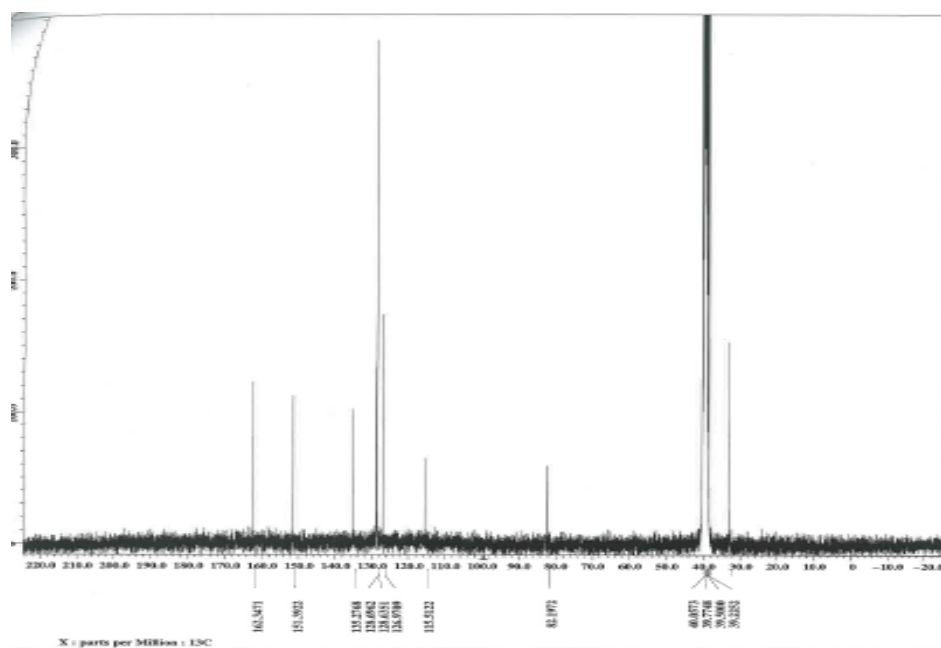

### Compound 4

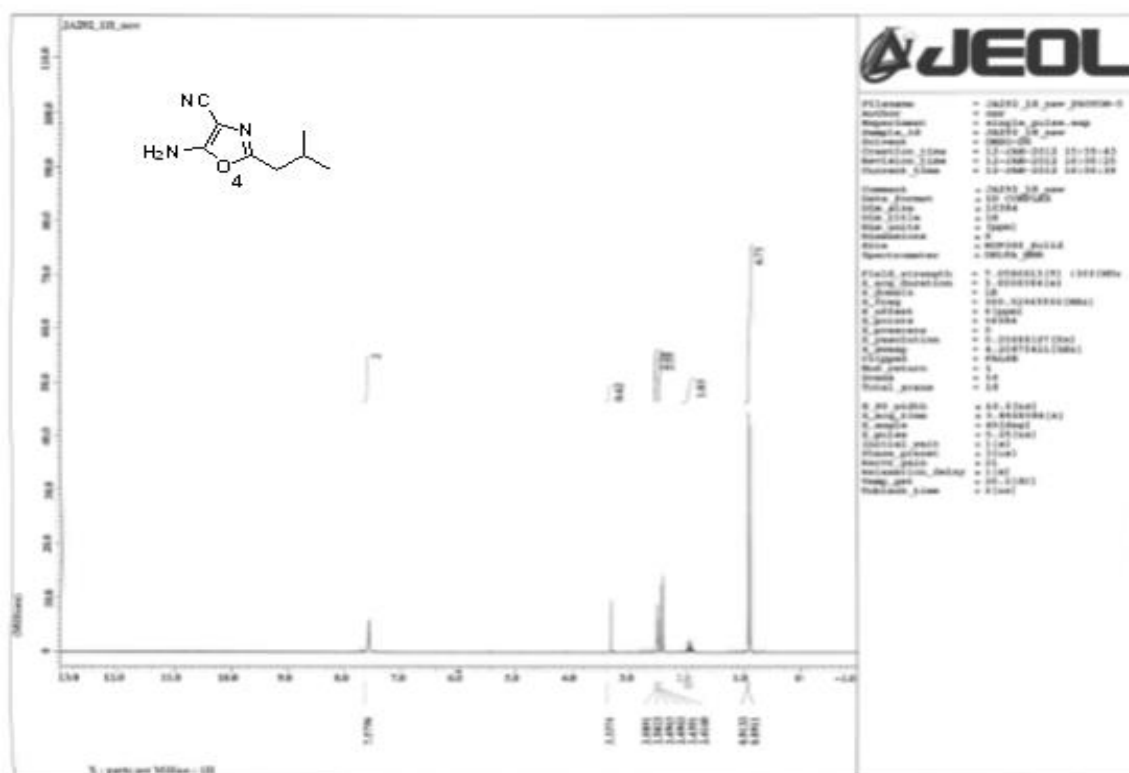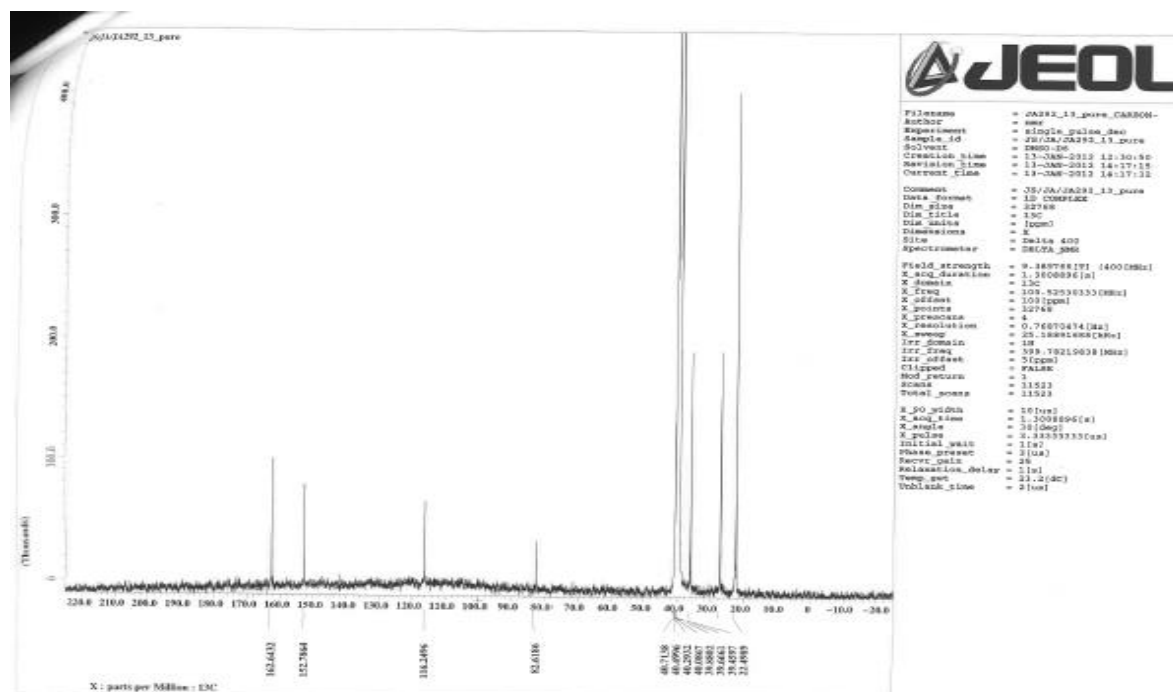



# Compound 5

(1) ELSD Signal Smooth (SG, 1x1)

86.096  
Range: 86.076

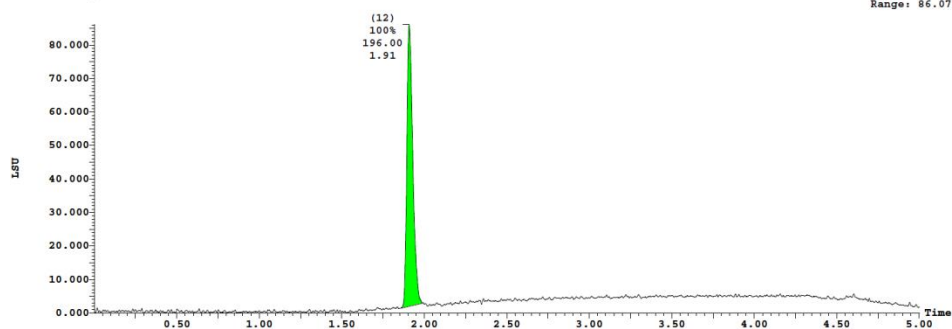

|                        |                      |                   |                |                        |                                                                                    |                      |           |
|------------------------|----------------------|-------------------|----------------|------------------------|------------------------------------------------------------------------------------|----------------------|-----------|
| Acquisition Time (sec) | 4.0894               | Comment           | OC_040_D_H1    | Date                   | 08 Aug 2014 21:05:20                                                               |                      |           |
| Date Stamp             | 08 Aug 2014 21:05:20 |                   |                | File Name              | \\hesita\work\chemistry\NMR Files\NMR_data\OC040\140807_OC_001-040D\12-H1\data\11r |                      |           |
| Frequency (MHz)        | 400.13               | Nucleus           | <sup>1</sup> H | Number of Transients   | 16                                                                                 | Origin               | Spect     |
| Original Points Count  | 32768                | Owner             | sqcnmr         | Points Count           | 65536                                                                              | Pulse Sequence       | zg30      |
| Receiver Gain          | 77.20                | SW(cyclical) (Hz) | 8012.82        | Solvent                | DMSO-d <sub>6</sub>                                                                | Spectrum Offset (Hz) | 2470.9668 |
| Spectrum Type          | STANDARD             | Sweep Width (Hz)  | 8012.70        | Temperature (degree C) | 25.149                                                                             |                      |           |

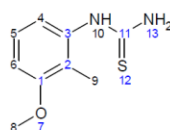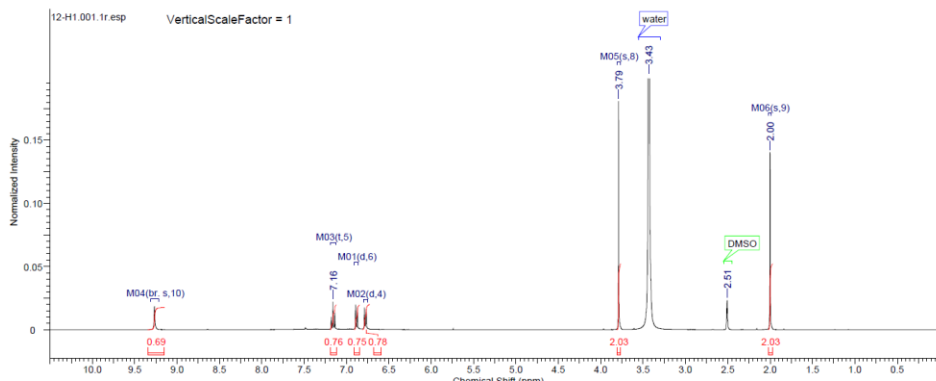

|                        |                      |                   |                 |                                                                                     |                      |
|------------------------|----------------------|-------------------|-----------------|-------------------------------------------------------------------------------------|----------------------|
| Acquisition Time (sec) | 1.3631               | Comment           | OC_040_D_C13    | Date                                                                                | 08 Aug 2014 21:03:12 |
| Date Stamp             | 08 Aug 2014 21:03:12 |                   | File Name       | \\hesita\work\chemistry\NMR Files\NMR_data\OC040\140807_OC_001-040D\11-C13\data\11r |                      |
| Frequency (MHz)        | 100.61               | Nucleus           | <sup>13</sup> C | Number of Transients                                                                | 1024                 |
| Original Points Count  | 32768                | Owner             | sqcnmr          | Points Count                                                                        | 32768                |
| Receiver Gain          | 194.71               | SW(cyclical) (Hz) | 24038.46        | Solvent                                                                             | DMSO-d6              |
| Spectrum Type          | APT                  | Sweep Width (Hz)  | 24037.73        | Temperature (degree C)                                                              | 25.159               |
|                        |                      |                   |                 | Spectrum Offset (Hz)                                                                | 10060.3320           |

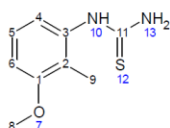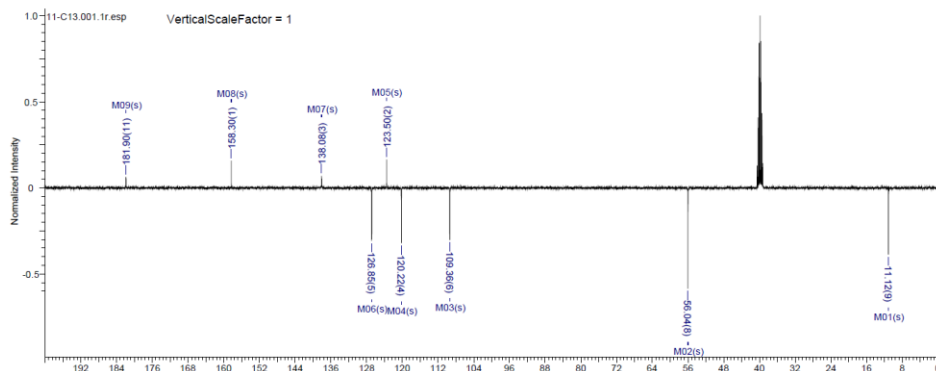

# Compound 6

UV Detector: 254 Smooth (S0, 1x1)

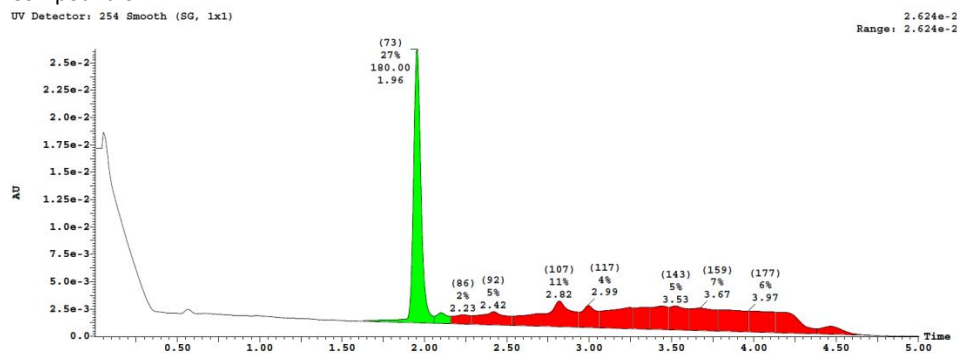

|                        |                      |                        |                |                      |                                                                                |
|------------------------|----------------------|------------------------|----------------|----------------------|--------------------------------------------------------------------------------|
| Acquisition Time (sec) | 4.0894               | Comment                | OC_039_1_H1    | Date                 | 06 Aug 2014 00:28:00                                                           |
| Date Stamp             | 06 Aug 2014 00:28:00 | Nucleus                | <sup>1</sup> H | File Name            | \\hesl\work\chemistry\NMR Files\NMR_data\OC06140805_OC_001-039\12-H1\data\111r |
| Frequency (MHz)        | 400.13               | Owner                  | sqcmmr         | Number of Transients | 16                                                                             |
| Original Points Count  | 32768                | SW(cyclical) (Hz)      | 8012.82        | Points Count         | 65536                                                                          |
| Receiver Gain          | 155.34               | Sweep Width (Hz)       | 8012.70        | Pulse Sequence       | zg30                                                                           |
| Spectrum Type          | STANDARD             | Temperature (degree C) | 25.151         | Solvent              | DMSO-d6                                                                        |
|                        |                      |                        |                | Spectrum Offset (Hz) | 2470.9668                                                                      |

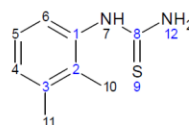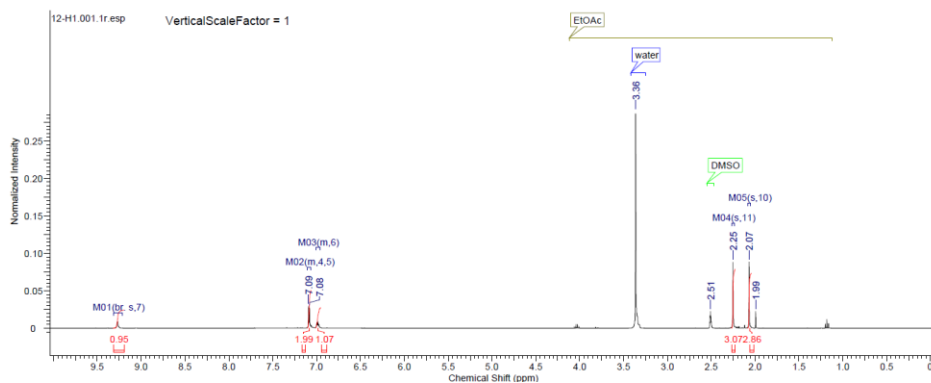

|                        |                      |                        |                 |                      |                                                                                 |
|------------------------|----------------------|------------------------|-----------------|----------------------|---------------------------------------------------------------------------------|
| Acquisition Time (sec) | 1.3631               | Comment                | OC_039_1_C13    | Date                 | 06 Aug 2014 00:25:52                                                            |
| Date Stamp             | 06 Aug 2014 00:25:52 | Nucleus                | <sup>13</sup> C | File Name            | \\hesl\work\chemistry\NMR Files\NMR_data\OC06140805_OC_001-039\11-C13\data\111r |
| Frequency (MHz)        | 100.61               | Owner                  | sqcmmr          | Number of Transients | 1024                                                                            |
| Original Points Count  | 32768                | SW(cyclical) (Hz)      | 24038.46        | Points Count         | 32768                                                                           |
| Receiver Gain          | 194.71               | Sweep Width (Hz)       | 24037.73        | Pulse Sequence       | mod                                                                             |
| Spectrum Type          | APT                  | Temperature (degree C) | 25.161          | Solvent              | DMSO-d6                                                                         |
|                        |                      |                        |                 | Spectrum Offset (Hz) | 10060.3320                                                                      |

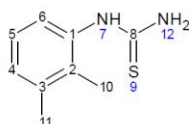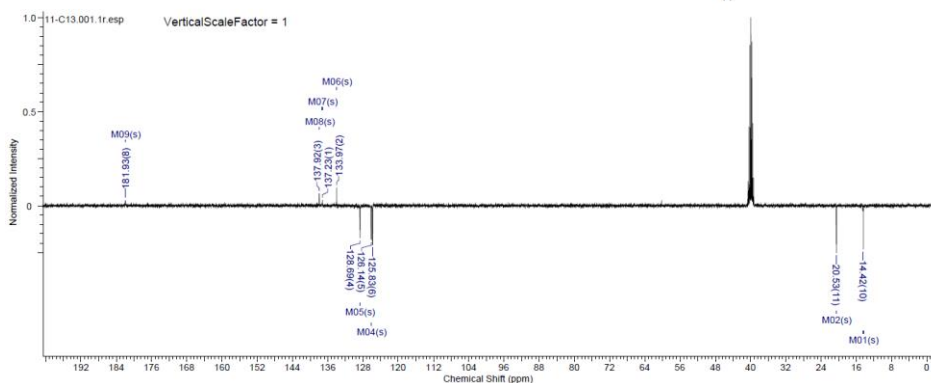

# Compound 7

(1) ELSD Signal Smooth (8G, 1x1)

10.921  
Range: 10.882

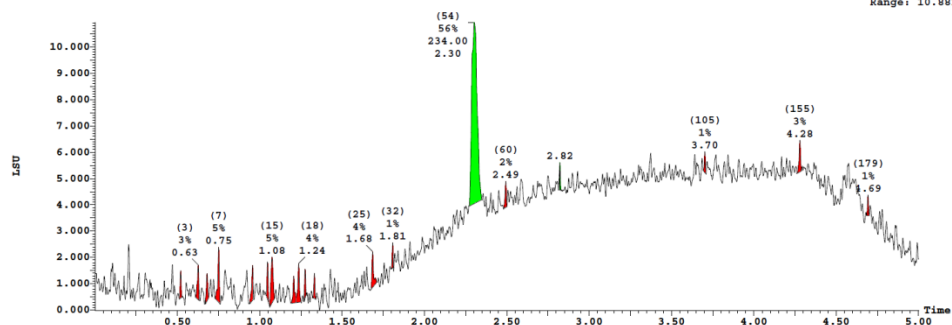

|                        |                      |                        |                                                                                   |                      |                      |
|------------------------|----------------------|------------------------|-----------------------------------------------------------------------------------|----------------------|----------------------|
| Acquisition Time (sec) | 4.0804               | Comment                | OC_039_J_H1                                                                       | Date                 | 06 Aug 2014 02:33:52 |
| Date Stamp             | 06 Aug 2014 02:33:52 | File Name              | \\heslabwork\chemistry\NMR Files\NMR_data\OC039\140805_OC_001-039J12-H1\data\11tr |                      |                      |
| Frequency (MHz)        | 400.13               | Nucleus                | <sup>1</sup> H                                                                    | Number of Transients | 16                   |
| Original Points Count  | 32768                | Owner                  | igormir                                                                           | Points Count         | 65536                |
| Receiver Gain          | 174.26               | Sweep Width (Hz)       | 8012.93                                                                           | Pulse Sequence       | zg30                 |
| Spectrum Type          | STANDARD             | Solvent                | DMSO-d6                                                                           | Spectrum Offset (Hz) | 2470.9668            |
|                        |                      | Temperature (degree C) | 25.150                                                                            |                      |                      |

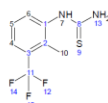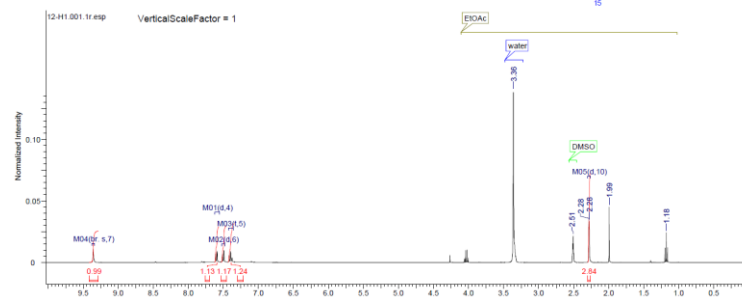

|                        |                      |                        |                                                                                    |                      |                      |
|------------------------|----------------------|------------------------|------------------------------------------------------------------------------------|----------------------|----------------------|
| Acquisition Time (sec) | 1.9031               | Comment                | OC_039_J_C13                                                                       | Date                 | 06 Aug 2014 02:31:44 |
| Date Stamp             | 06 Aug 2014 02:31:44 | File Name              | \\heslabwork\chemistry\NMR Files\NMR_data\OC039\140805_OC_001-039J11-C13\data\11tr |                      |                      |
| Frequency (MHz)        | 100.61               | Nucleus                | <sup>13</sup> C                                                                    | Number of Transients | 1024                 |
| Original Points Count  | 32768                | Owner                  | igormir                                                                            | Points Count         | 32768                |
| Receiver Gain          | 194.71               | Sweep Width (Hz)       | 24937.29                                                                           | Pulse Sequence       | zgpg30               |
| Spectrum Type          | APT                  | Solvent                | DMSO-d6                                                                            | Spectrum Offset (Hz) | 10060.3320           |
|                        |                      | Temperature (degree C) | 25.162                                                                             |                      |                      |

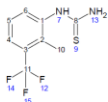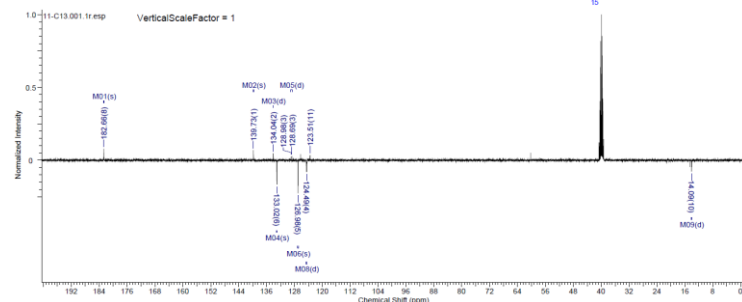

|                        |                      |                        |                                                                                   |                      |                      |
|------------------------|----------------------|------------------------|-----------------------------------------------------------------------------------|----------------------|----------------------|
| Acquisition Time (sec) | 0.7330               | Comment                | OC_039_J_F19                                                                      | Date                 | 22 Aug 2014 17:45:56 |
| Date Stamp             | 22 Aug 2014 17:45:56 | File Name              | \\heslabwork\chemistry\NMR Files\NMR_data\OC039\140822_OC_001-039J1_F19\data\11tr |                      |                      |
| Frequency (MHz)        | 376.50               | Nucleus                | <sup>19</sup> F                                                                   | Number of Transients | 16                   |
| Original Points Count  | 65488                | Owner                  | igormir                                                                           | Points Count         | 131072               |
| Receiver Gain          | 194.71               | Sweep Width (Hz)       | 89285.03                                                                          | Pulse Sequence       | zgpg30               |
| Spectrum Type          | STANDARD             | Solvent                | DMSO-d6                                                                           | Spectrum Offset (Hz) | -37449.6211          |
|                        |                      | Temperature (degree C) | 25.159                                                                            |                      |                      |

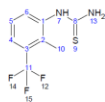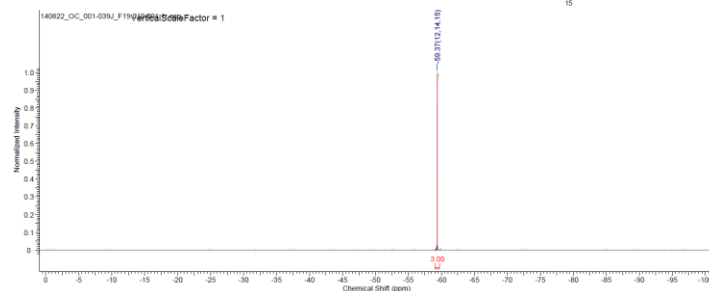

# Compound 8

(1) ELSD Signal Smooth (SG, 1x1)

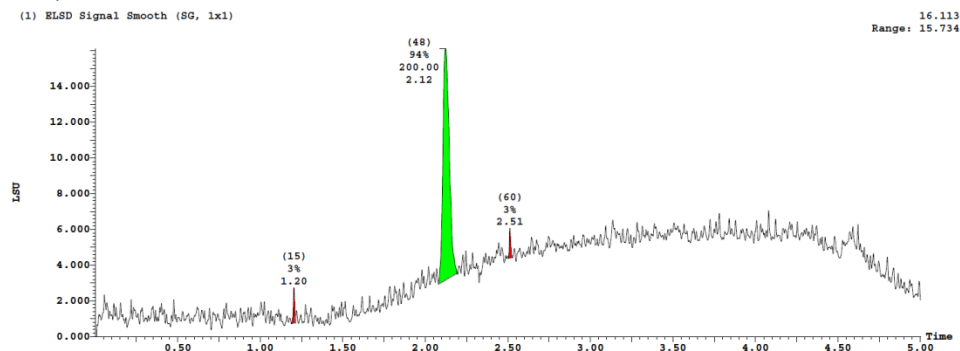

|                        |                      |                        |                |                      |                                                                             |
|------------------------|----------------------|------------------------|----------------|----------------------|-----------------------------------------------------------------------------|
| Acquisition Time (sec) | 4.0894               | Comment                | OC_039G_H1     | Date                 | 14 Aug 2014 00:04:32                                                        |
| Date Stamp             | 14 Aug 2014 00:04:32 |                        |                | File Name            | \\hesia\work\chemistry\NMR Files\NMR_data\OCox\140813_OC_001-039G_HMBC\111r |
| Frequency (MHz)        | 400.13               | Nucleus                | <sup>1</sup> H | Number of Transients | 16                                                                          |
| Original Points Count  | 32768                | Owner                  | sgcnmr         | Points Count         | 65536                                                                       |
| Receiver Gain          | 174.26               | SW(cyclical) (Hz)      | 8012.82        | Pulse Sequence       | zg30                                                                        |
| Spectrum Type          | STANDARD             | Sweep Width (Hz)       | 8012.70        | Spectrum Offset (Hz) | 2470.9668                                                                   |
|                        |                      | Temperature (degree C) | 25.162         |                      |                                                                             |

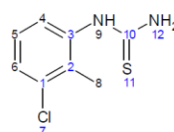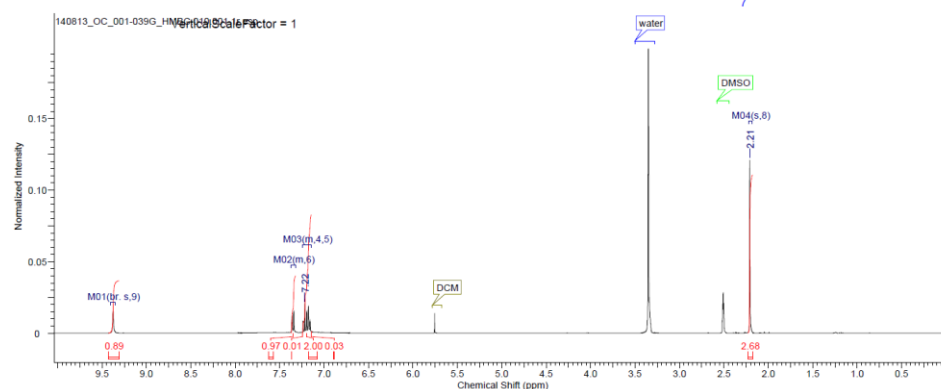

|                        |                      |                        |                 |                      |                                                                                    |
|------------------------|----------------------|------------------------|-----------------|----------------------|------------------------------------------------------------------------------------|
| Acquisition Time (sec) | 1.3631               | Comment                | OC_039_G_C13    | Date                 | 04 Aug 2014 21:03:12                                                               |
| Date Stamp             | 04 Aug 2014 21:03:12 |                        |                 | File Name            | \\hesia\work\chemistry\NMR Files\NMR_data\OCox\140804_OC_001-039G\20-C13\data\111r |
| Frequency (MHz)        | 100.61               | Nucleus                | <sup>13</sup> C | Number of Transients | 1024                                                                               |
| Original Points Count  | 32768                | Owner                  | sgcnmr          | Points Count         | 32768                                                                              |
| Receiver Gain          | 194.71               | SW(cyclical) (Hz)      | 24038.46        | Pulse Sequence       | jmod                                                                               |
| Spectrum Type          | APT                  | Sweep Width (Hz)       | 24037.73        | Spectrum Offset (Hz) | 10950.3320                                                                         |
|                        |                      | Temperature (degree C) | 25.159          |                      |                                                                                    |

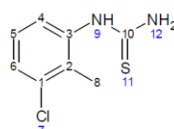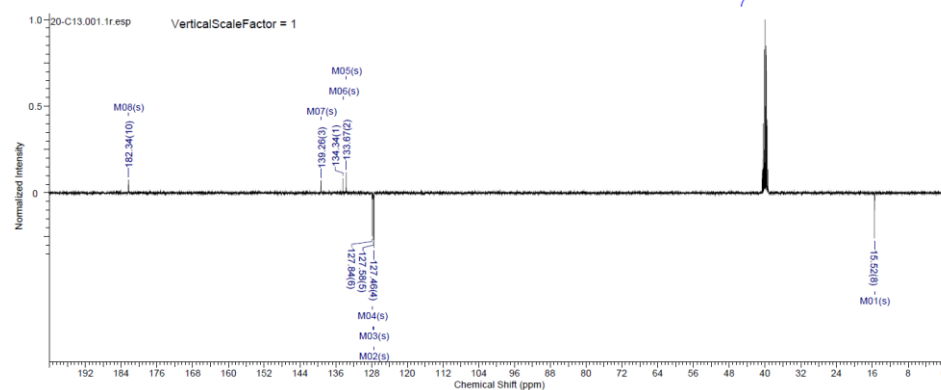

# Compound 9

(1) ELSA Signal Smooth (SG, 1x1)

13.473  
Range: 13.411

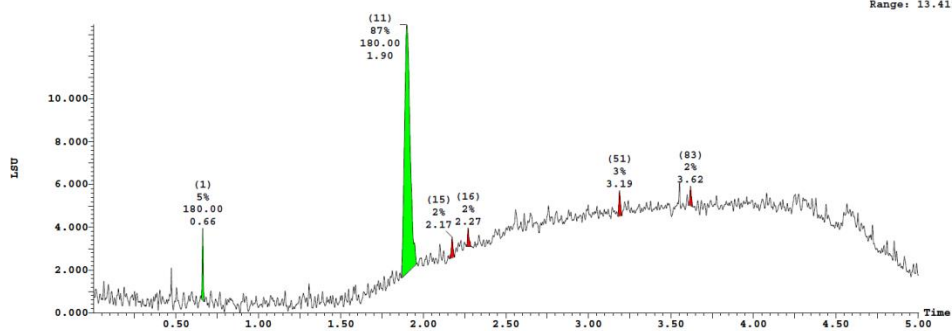

|                        |                      |                   |                        |                      |                                                                                   |
|------------------------|----------------------|-------------------|------------------------|----------------------|-----------------------------------------------------------------------------------|
| Acquisition Time (sec) | 4.0894               | Comment           | OC_040_C_H1            | Date                 | 07 Aug 2014 23:11:12                                                              |
| Date Stamp             | 07 Aug 2014 23:11:12 |                   |                        | File Name            | Vheta\work\chemistry\NMR Files\NMR_data\OC040\140807_OC_001-040C\12-H1\pdata\11fr |
| Frequency (MHz)        | 400.13               | Nucleus           | <sup>1</sup> H         | Number of Transients | 16                                                                                |
| Original Points Count  | 32768                | Owner             | sqcnmr                 | Points Count         | 65536                                                                             |
| Receiver Gain          | 77.20                | SW(cyclical) (Hz) | 8012.82                | Pulse Sequence       | zg30                                                                              |
| Spectrum Type          | STANDARD             | Sweep Width (Hz)  | 8012.70                | Spectrum Offset (Hz) | 2470.9568                                                                         |
|                        |                      |                   | Temperature (degree C) | 25.148               |                                                                                   |

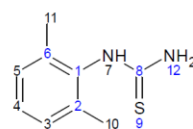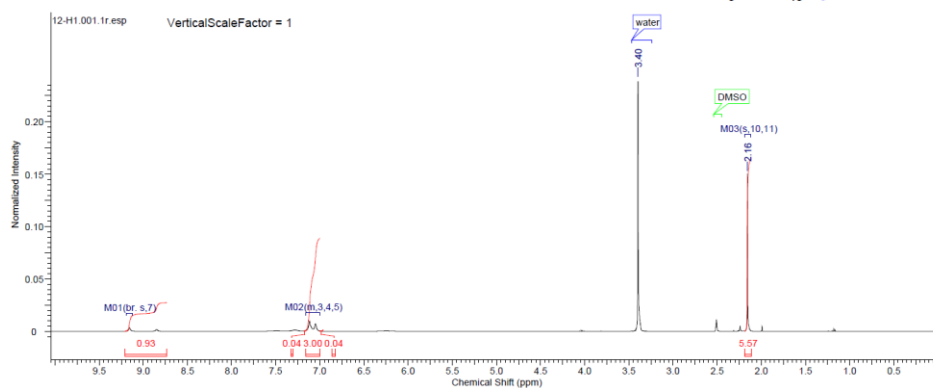

|                        |                      |                   |                        |                      |                                                                                    |
|------------------------|----------------------|-------------------|------------------------|----------------------|------------------------------------------------------------------------------------|
| Acquisition Time (sec) | 1.3631               | Comment           | OC_040_C_C13           | Date                 | 07 Aug 2014 23:09:04                                                               |
| Date Stamp             | 07 Aug 2014 23:09:04 |                   |                        | File Name            | Vheta\work\chemistry\NMR Files\NMR_data\OC040\140807_OC_001-040C\11-APT\pdata\11fr |
| Frequency (MHz)        | 100.61               | Nucleus           | <sup>13</sup> C        | Number of Transients | 1024                                                                               |
| Original Points Count  | 32768                | Owner             | sqcnmr                 | Points Count         | 32768                                                                              |
| Receiver Gain          | 194.71               | SW(cyclical) (Hz) | 24038.46               | Pulse Sequence       | jmod                                                                               |
| Spectrum Type          | APT                  | Sweep Width (Hz)  | 24037.73               | Spectrum Offset (Hz) | 10060.3320                                                                         |
|                        |                      |                   | Temperature (degree C) | 25.159               |                                                                                    |

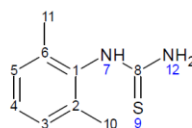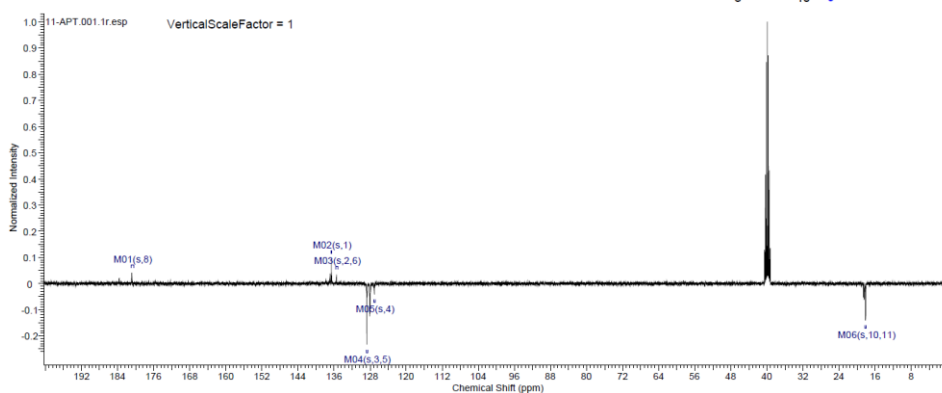

# Compound 10

UV Detector: 254 Smooth (8G, 1x1)

8.639e-2  
Range: 8.639e-2

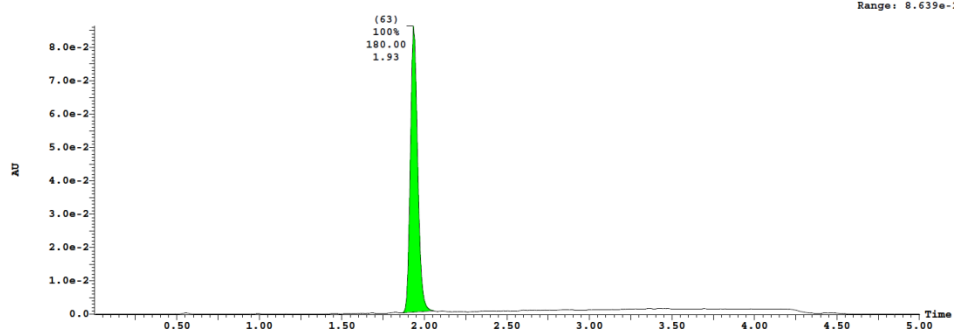

|                        |                      |                   |                                                                                     |                        |                      |
|------------------------|----------------------|-------------------|-------------------------------------------------------------------------------------|------------------------|----------------------|
| Acquisition Time (sec) | 4.0894               | Comment           | OC_029_A_H1                                                                         | Date                   | 12 Jul 2014 03:25:04 |
| Date Stamp             | 12 Jul 2014 03:25:04 | File Name         | \\heslata\work\chemistry\NMR Files\NMR_data\OCox\140710_OC_001-029A\12 H1\data\111r |                        |                      |
| Frequency (MHz)        | 400.13               | Nucleus           | 1H                                                                                  | Number of Transients   | 16                   |
| Original Points Count  | 32768                | Owner             | sqnmr                                                                               | Points Count           | 65536                |
| Receiver Gain          | 194.71               | SW(cyclical) (Hz) | 8012.82                                                                             | Pulse Sequence         | zgpg30               |
| Spectrum Offset (Hz)   | 2465.3035            | Spectrum Type     | STANDARD                                                                            | Solvent                | CHLOROFORM-d         |
|                        |                      |                   |                                                                                     | Sweep Width (Hz)       | 8012.70              |
|                        |                      |                   |                                                                                     | Temperature (degree C) | 25.157               |

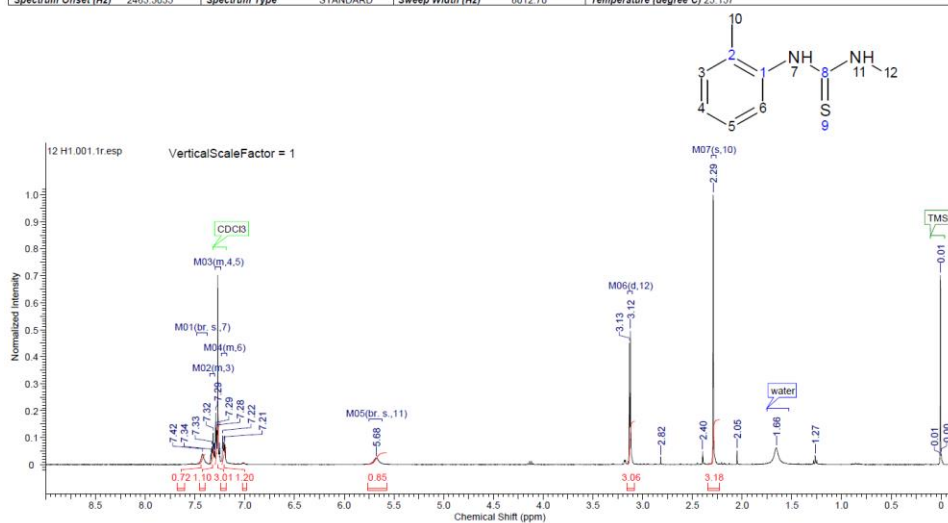

|                        |                      |                   |                                                                                      |                        |                      |
|------------------------|----------------------|-------------------|--------------------------------------------------------------------------------------|------------------------|----------------------|
| Acquisition Time (sec) | 1.3631               | Comment           | OC_029_A_C13                                                                         | Date                   | 12 Jul 2014 03:03:44 |
| Date Stamp             | 12 Jul 2014 03:03:44 | File Name         | \\heslata\work\chemistry\NMR Files\NMR_data\OCox\140710_OC_001-029A\10 C13\data\111r |                        |                      |
| Frequency (MHz)        | 100.61               | Nucleus           | 13C                                                                                  | Number of Transients   | 1024                 |
| Original Points Count  | 32768                | Owner             | sqnmr                                                                                | Points Count           | 32768                |
| Receiver Gain          | 194.71               | SW(cyclical) (Hz) | 24038.46                                                                             | Pulse Sequence         | zgpg30               |
| Spectrum Offset (Hz)   | 10058.3760           | Spectrum Type     | STANDARD                                                                             | Solvent                | CHLOROFORM-d         |
|                        |                      |                   |                                                                                      | Sweep Width (Hz)       | 24037.73             |
|                        |                      |                   |                                                                                      | Temperature (degree C) | 25.158               |

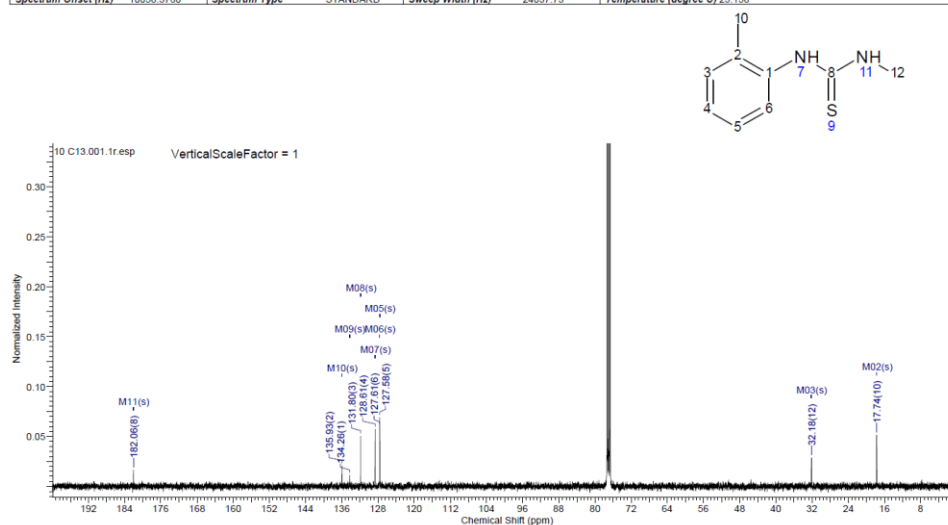

# Compound 11

UV Detector: 254 Smooth (5G, 1x1)

1.858e-1  
Range: 1.858e-1

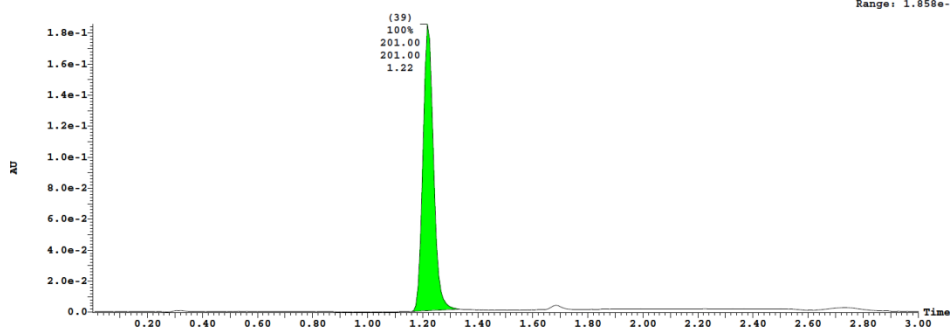

|                        |                      |                   |                |                        |                                                                                 |
|------------------------|----------------------|-------------------|----------------|------------------------|---------------------------------------------------------------------------------|
| Acquisition Time (sec) | 4.0894               | Comment           | OC 050 F       | Date                   | 09 Dec 2014 09:44:32                                                            |
| Date Stamp             | 09 Dec 2014 09:44:32 |                   |                | File Name              | Vibestawork\chemistry\NMR Files\NMR_data\OCox141209_OC_001-050F10-H1\pdata1\11r |
| Frequency (MHz)        | 400.13               | Nucleus           | <sup>1</sup> H | Number of Transients   | 16                                                                              |
| Original Points Count  | 32768                | Owner             | sqcnmr         | Points Count           | 65536                                                                           |
| Receiver Gain          | 194.71               | SW(cyclical) (Hz) | 8012.82        | Solvent                | CHLOROFORM-d                                                                    |
| Spectrum Offset (Hz)   | 2470.9668            | Spectrum Type     | STANDARD       | Sweep Width (Hz)       | 8012.70                                                                         |
|                        |                      |                   |                | Temperature (degree C) | 25.157                                                                          |

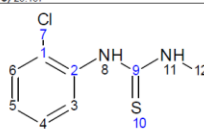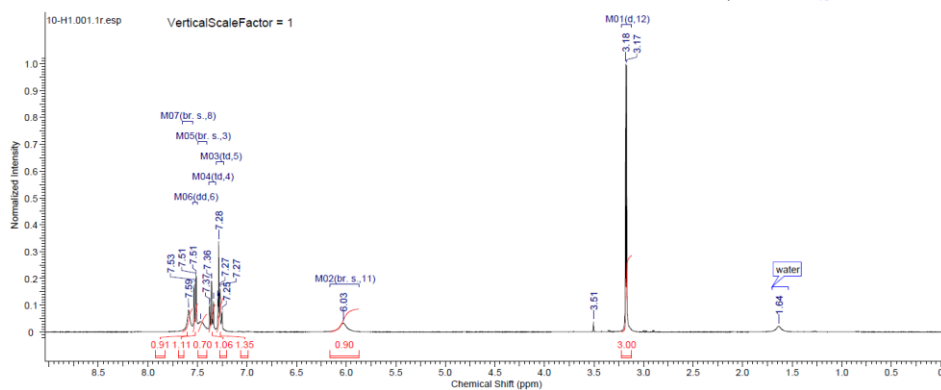

|                        |                      |                   |                 |                        |                                                                                  |
|------------------------|----------------------|-------------------|-----------------|------------------------|----------------------------------------------------------------------------------|
| Acquisition Time (sec) | 1.3631               | Comment           | OC 050 F C13    | Date                   | 10 Dec 2014 02:01:36                                                             |
| Date Stamp             | 10 Dec 2014 02:01:36 |                   |                 | File Name              | Vibestawork\chemistry\NMR Files\NMR_data\OCox141209_OC_001-050F15-C13\pdata1\11r |
| Frequency (MHz)        | 100.61               | Nucleus           | <sup>13</sup> C | Number of Transients   | 4096                                                                             |
| Original Points Count  | 32768                | Owner             | sqcnmr          | Points Count           | 32768                                                                            |
| Receiver Gain          | 194.71               | SW(cyclical) (Hz) | 24038.46        | Solvent                | CHLOROFORM-d                                                                     |
| Spectrum Offset (Hz)   | 10059.8594           | Spectrum Type     | STANDARD        | Sweep Width (Hz)       | 24037.73                                                                         |
|                        |                      |                   |                 | Temperature (degree C) | 25.160                                                                           |

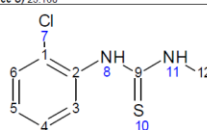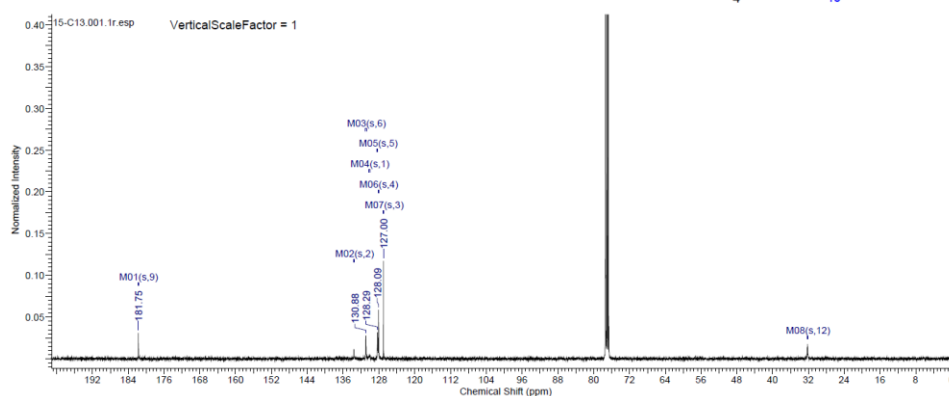

# Compound 12

(1) ELSD Signal Smooth (SG, 1x1)

19.331  
Range: 19.282

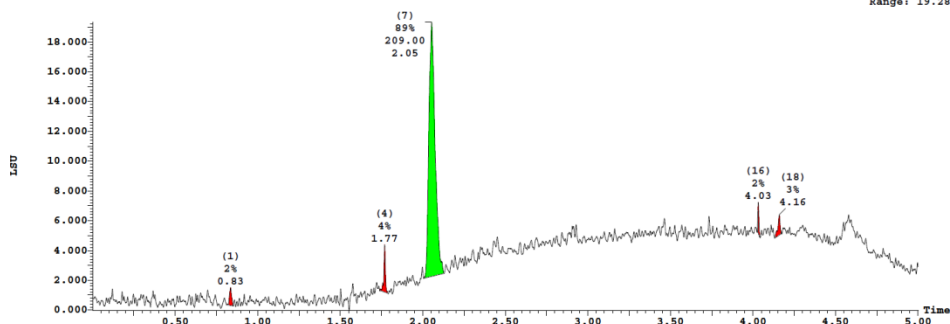

|                        |                      |                   |                                                                |                        |                      |
|------------------------|----------------------|-------------------|----------------------------------------------------------------|------------------------|----------------------|
| Acquisition Time (sec) | 4.0894               | Comment           | OC 037 G H1                                                    | Date                   | 31 Jul 2014 07:13:20 |
| Date Stamp             | 31 Jul 2014 07:13:20 | File Name         | Vibeslabworkchemistry\NMR Files\NMR_data\OC037G11-H1\data\111r | Origin                 | Spect                |
| Frequency (MHz)        | 400.13               | Nucleus           | <sup>1</sup> H                                                 | Number of Transients   | 16                   |
| Original Points Count  | 32768                | Owner             | sqcmmr                                                         | Points Count           | 65536                |
| Receiver Gain          | 194.71               | SW(cyclical) (Hz) | 8012.82                                                        | Pulse Sequence         | zg30                 |
| Spectrum Offset (Hz)   | 2434.1191            | Spectrum Type     | STANDARD                                                       | Solvent                | CHLOROFORM-d         |
|                        |                      | Sweep Width (Hz)  | 8012.70                                                        | Temperature (degree C) | 25.154               |

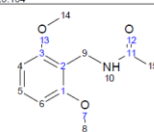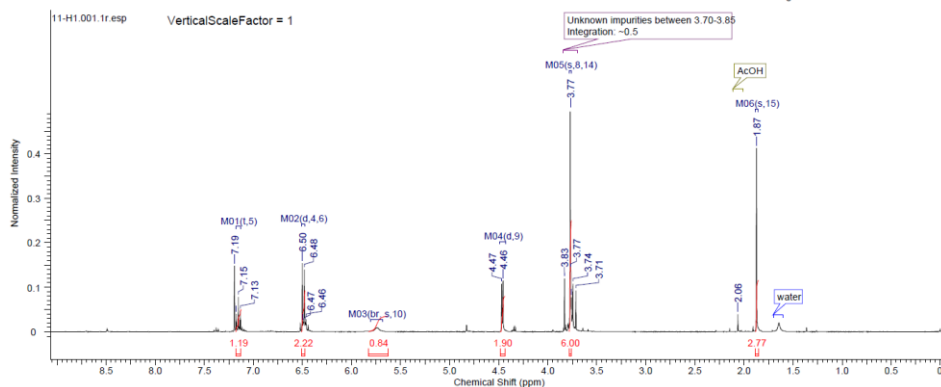

|                        |                      |                   |                                                                 |                        |                      |
|------------------------|----------------------|-------------------|-----------------------------------------------------------------|------------------------|----------------------|
| Acquisition Time (sec) | 1.3631               | Comment           | OC 037 G C13                                                    | Date                   | 01 Aug 2014 01:59:44 |
| Date Stamp             | 01 Aug 2014 01:59:44 | File Name         | Vibeslabworkchemistry\NMR Files\NMR_data\OC037G10-C13\data\111r | Origin                 | Spect                |
| Frequency (MHz)        | 100.61               | Nucleus           | <sup>13</sup> C                                                 | Number of Transients   | 1624                 |
| Original Points Count  | 32768                | Owner             | sqcmmr                                                          | Points Count           | 32768                |
| Receiver Gain          | 194.71               | SW(cyclical) (Hz) | 24038.46                                                        | Pulse Sequence         | jmod                 |
| Spectrum Offset (Hz)   | 10060.3320           | Spectrum Type     | APT                                                             | Solvent                | CHLOROFORM-d         |
|                        |                      | Sweep Width (Hz)  | 24037.73                                                        | Temperature (degree C) | 25.160               |

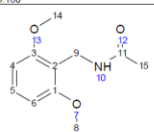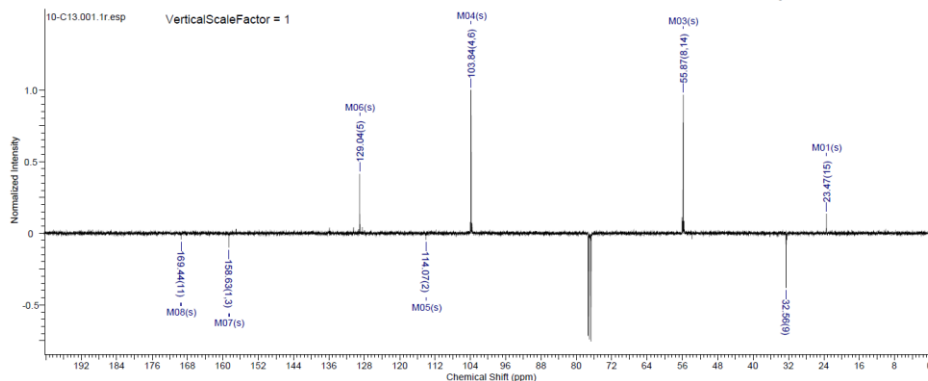



# Compound 13

(1) ELSD Signal Smooth (80, 1x1)

497.454  
Range: 497.444

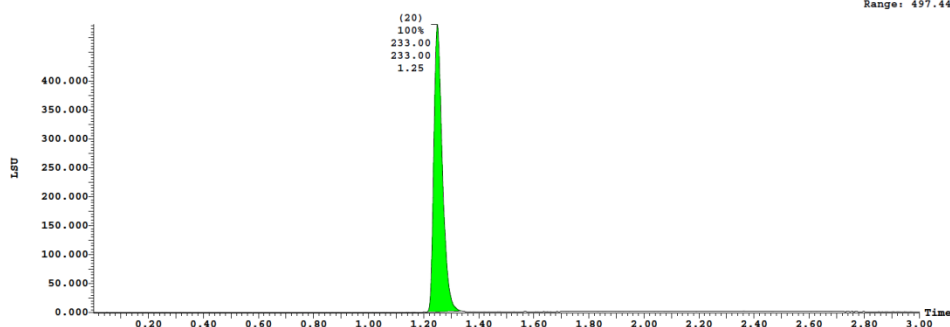

|                        |                      |                   |                |                        |                                                                                  |
|------------------------|----------------------|-------------------|----------------|------------------------|----------------------------------------------------------------------------------|
| Acquisition Time (sec) | 4.0894               | Comment           | OC_035_H1      | Date                   | 10 Jul 2014 15:26:08                                                             |
| Date Stamp             | 10 Jul 2014 15:26:08 |                   |                | File Name              | \\hestia\work\chemistry\NMR Files\NMR_data\OCox140710_OC_001-035\12-H1\data\111r |
| Frequency (MHz)        | 400.13               | Nucleus           | <sup>1</sup> H | Number of Transients   | 16                                                                               |
| Original Points Count  | 32768                | Owner             | sqcnmr         | Points Count           | 65536                                                                            |
| Receiver Gain          | 194.71               | SW(cyclical) (Hz) | 8012.82        | Pulse Sequence         | zg30                                                                             |
| Spectrum Offset (Hz)   | 2462.7417            | Spectrum Type     | STANDARD       | Solvent                | CHLOROFORM-d                                                                     |
|                        |                      |                   |                | Sweep Width (Hz)       | 8012.70                                                                          |
|                        |                      |                   |                | Temperature (degree C) | 25.157                                                                           |

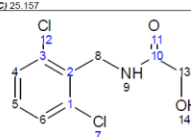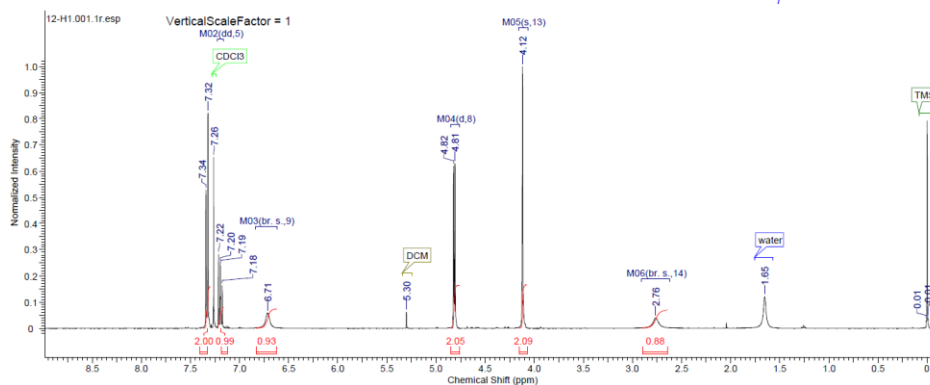

|                        |                      |                   |                 |                        |                                                                                   |
|------------------------|----------------------|-------------------|-----------------|------------------------|-----------------------------------------------------------------------------------|
| Acquisition Time (sec) | 1.3631               | Comment           | OC_035_HMBC     | Date                   | 12 Jul 2014 08:40:48                                                              |
| Date Stamp             | 12 Jul 2014 08:40:48 |                   |                 | File Name              | \\hestia\work\chemistry\NMR Files\NMR_data\OCox140710_OC_001-035\16-C13\data\111r |
| Frequency (MHz)        | 100.61               | Nucleus           | <sup>13</sup> C | Number of Transients   | 1024                                                                              |
| Original Points Count  | 32768                | Owner             | sqcnmr          | Points Count           | 32768                                                                             |
| Receiver Gain          | 194.71               | SW(cyclical) (Hz) | 24038.46        | Pulse Sequence         | jmod                                                                              |
| Spectrum Offset (Hz)   | 10060.8965           | Spectrum Type     | APT             | Solvent                | CHLOROFORM-d                                                                      |
|                        |                      |                   |                 | Sweep Width (Hz)       | 24037.73                                                                          |
|                        |                      |                   |                 | Temperature (degree C) | 25.160                                                                            |

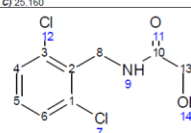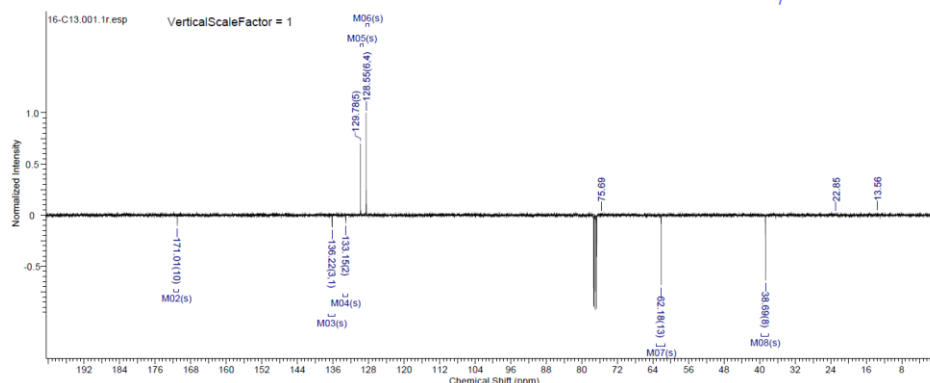

# Compound 14

UV Detector: TIC Smooth (8G, 1x1)

2.937e-1  
Range: 2.937e-1

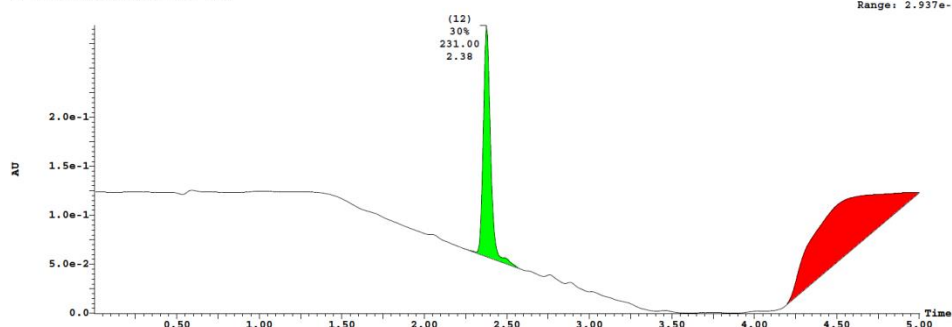

|                        |                      |                    |                                                                                    |                        |                      |
|------------------------|----------------------|--------------------|------------------------------------------------------------------------------------|------------------------|----------------------|
| Acquisition Time (sec) | 4.0894               | Comment            | OC_037_A_H1                                                                        | Date                   | 30 Jul 2014 21:05:20 |
| Date Stamp             | 30 Jul 2014 21:05:20 | File Name          | \\hestia\work\chemistry\NMR Files\NMR_data\OCox\140730_OC_001-037A\21-H1\data\111r |                        |                      |
| Frequency (MHz)        | 400.13               | Nucleus            | <sup>1</sup> H                                                                     | Number of Transients   | 16                   |
| Original Points Count  | 32768                | Owner              | sqcmmf                                                                             | Points Count           | 65536                |
| Receiver Gain          | 194.71               | SW (cyclical) (Hz) | 8012.82                                                                            | Pulse Sequence         | zg30                 |
| Spectrum Offset (Hz)   | 2435.8118            | Spectrum Type      | STANDARD                                                                           | Solvent                | CHLOROFORM-d         |
|                        |                      | Sweep Width (Hz)   | 8012.70                                                                            | Temperature (degree C) | 25.152               |

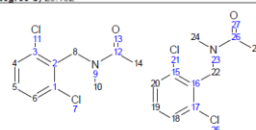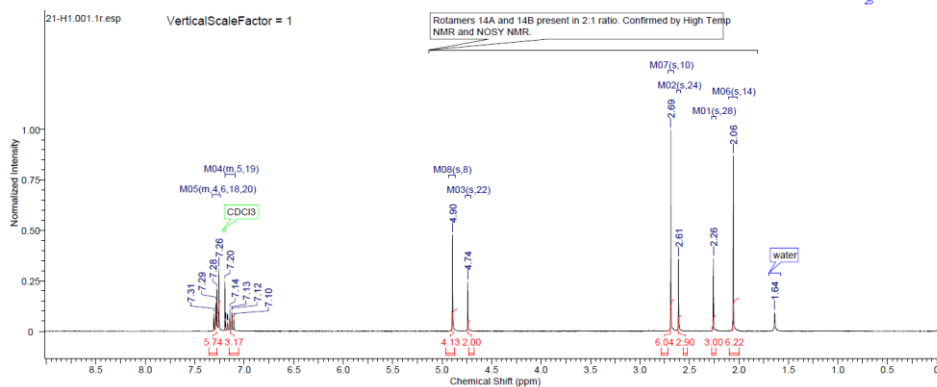

|                        |                      |                    |                                                                                     |                        |                      |
|------------------------|----------------------|--------------------|-------------------------------------------------------------------------------------|------------------------|----------------------|
| Acquisition Time (sec) | 1.3631               | Comment            | OC_037_A_C13                                                                        | Date                   | 30 Jul 2014 21:03:12 |
| Date Stamp             | 30 Jul 2014 21:03:12 | File Name          | \\hestia\work\chemistry\NMR Files\NMR_data\OCox\140730_OC_001-037A\20-C13\data\111r |                        |                      |
| Frequency (MHz)        | 100.61               | Nucleus            | <sup>13</sup> C                                                                     | Number of Transients   | 1024                 |
| Original Points Count  | 32768                | Owner              | sqcmmf                                                                              | Points Count           | 32768                |
| Receiver Gain          | 194.71               | SW (cyclical) (Hz) | 24038.46                                                                            | Pulse Sequence         | imod                 |
| Spectrum Offset (Hz)   | 10050.3320           | Spectrum Type      | APT                                                                                 | Solvent                | CHLOROFORM-d         |
|                        |                      | Sweep Width (Hz)   | 24037.73                                                                            | Temperature (degree C) | 25.160               |

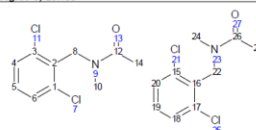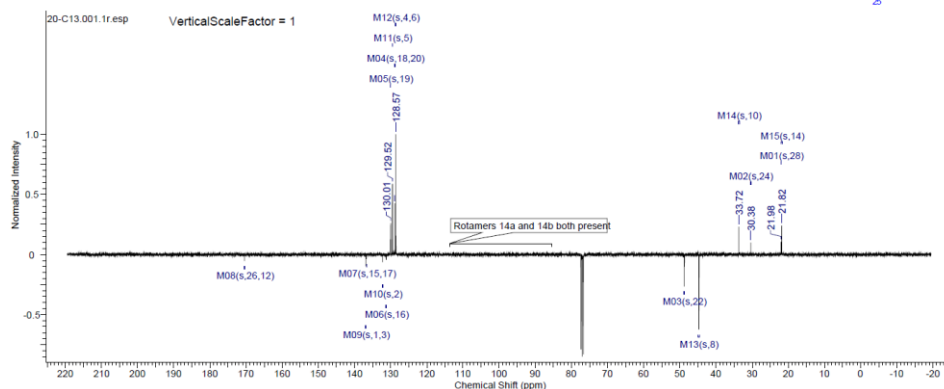

# Compound 14 continued

|                        |                      |                      |                     |                      |                                                                                   |
|------------------------|----------------------|----------------------|---------------------|----------------------|-----------------------------------------------------------------------------------|
| Acquisition Time (sec) | 7.9299               | Comment              | OC_037A.DMSQH1      | Date                 | 22 Aug 2014 19:29:36                                                              |
| Date Stamp             | 22 Aug 2014 10:29:36 | Nucleus              | <sup>1</sup> H      | File Name            | \\hesliawork\chemistry\NMR Files\NMR_data\OC\140822_OC_001-037A.DMSO\11\data\111r |
| Frequency (MHz)        | 400.13               | Owner                | 59CMMR              | Number of Transients | 16                                                                                |
| Original Points Count  | 65536                | Solvent              | DMSO-d <sub>6</sub> | Points Count         | 131072                                                                            |
| Receiver Gain          | 141.63               | SW (cyclical) (Hz)   | 8264.46             | Pulse Sequence       | zgpg30                                                                            |
| Spectrum Type          | STANDARD             | Sweep Width (Hz)     | 8264.40             | Spectrum Offset (Hz) | -2479.3009                                                                        |
|                        |                      | Temperature (degree) | 70.130              |                      |                                                                                   |

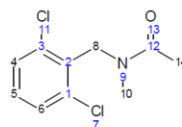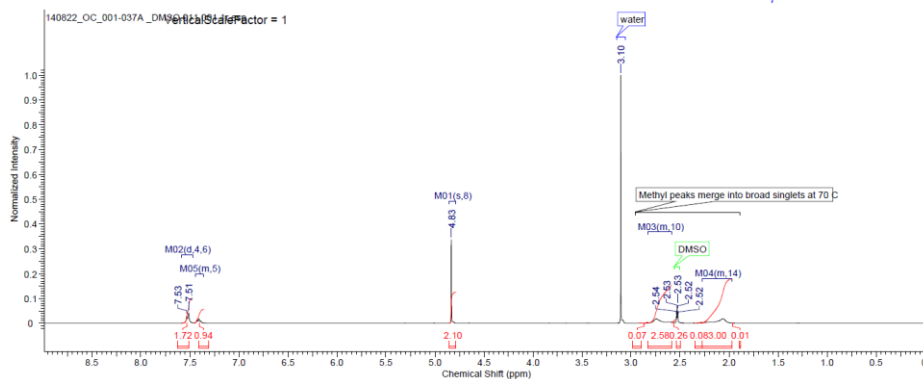

140814\_OC\_001-037A.NOE 011.001.2rr.esp

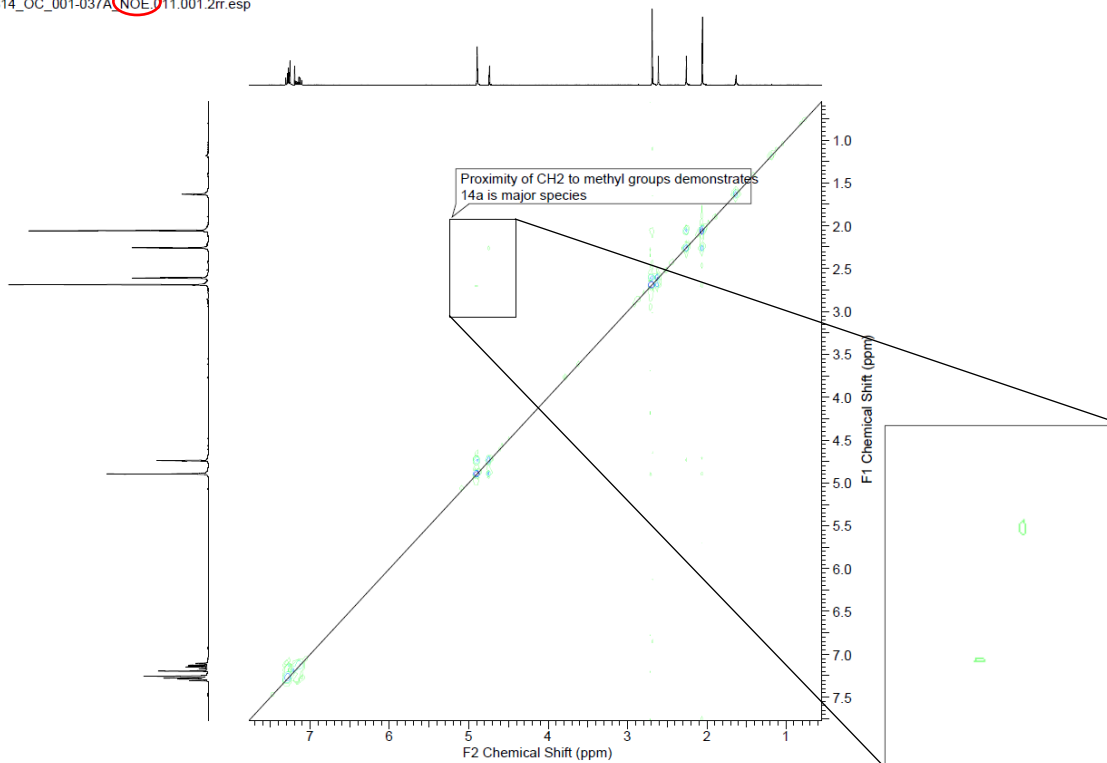

# Compound 15

(1) ELSD Signal Smooth (8G, 1x1)

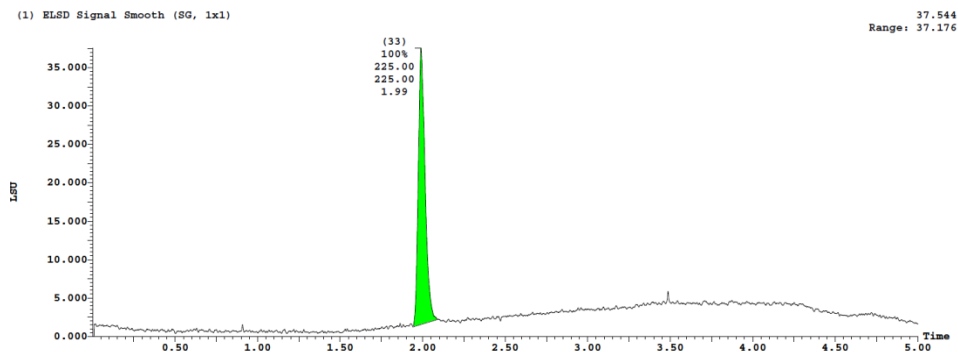

|                        |                      |                    |                                                                                |                        |                      |
|------------------------|----------------------|--------------------|--------------------------------------------------------------------------------|------------------------|----------------------|
| Acquisition Time (sec) | 4.0894               | Comment            | OC_067                                                                         | Date                   | 26 Jan 2015 16:49:04 |
| Date Stamp             | 26 Jan 2015 16:49:04 | File Name          | \\hestia\work\chemistry\NMR Files\NMR_data\OCoxi150126_OC_001-067\10\data\111r |                        |                      |
| Frequency (MHz)        | 400.13               | Nucleus            | 1H                                                                             | Number of Transients   | 16                   |
| Original Points Count  | 32768                | Owner              | sqcnmr                                                                         | Points Count           | 65536                |
| Receiver Gain          | 194.71               | SW (cyclical) (Hz) | 8012.82                                                                        | Solvent                | CHLOROFORM-d         |
| Spectrum Offset (Hz)   | 2470.9668            | Spectrum Type      | STANDARD                                                                       | Sweep Width (Hz)       | 8012.70              |
|                        |                      |                    |                                                                                | Temperature (degree C) | 25.158               |

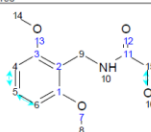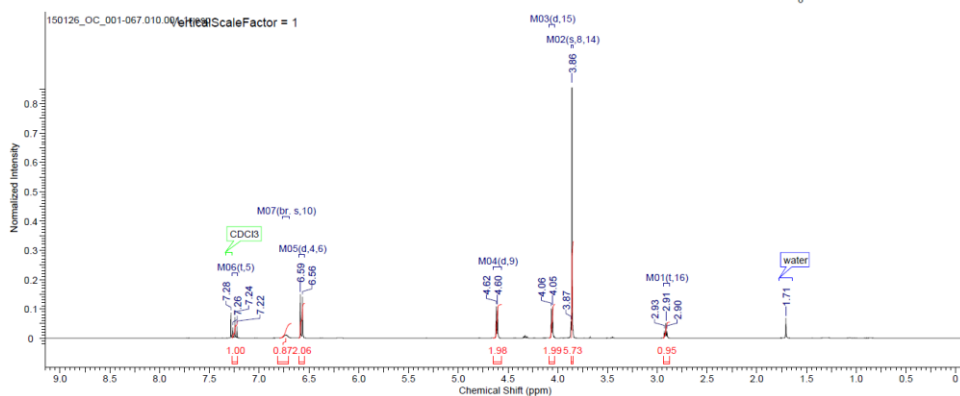

|                        |                      |                    |                                                                                    |                        |                      |
|------------------------|----------------------|--------------------|------------------------------------------------------------------------------------|------------------------|----------------------|
| Acquisition Time (sec) | 1.3631               | Comment            | OC_067_C13                                                                         | Date                   | 27 Jan 2015 04:16:00 |
| Date Stamp             | 27 Jan 2015 04:16:00 | File Name          | \\hestia\work\chemistry\NMR Files\NMR_data\OCoxi150126_OC_001-067\11-C13\data\111r |                        |                      |
| Frequency (MHz)        | 100.61               | Nucleus            | 13C                                                                                | Number of Transients   | 1024                 |
| Original Points Count  | 32768                | Owner              | sqcnmr                                                                             | Points Count           | 32768                |
| Receiver Gain          | 194.71               | SW (cyclical) (Hz) | 24038.46                                                                           | Solvent                | CHLOROFORM-d         |
| Spectrum Offset (Hz)   | 10060.3320           | Spectrum Type      | APT                                                                                | Sweep Width (Hz)       | 24037.73             |
|                        |                      |                    |                                                                                    | Temperature (degree C) | 25.159               |

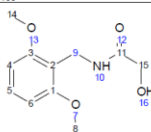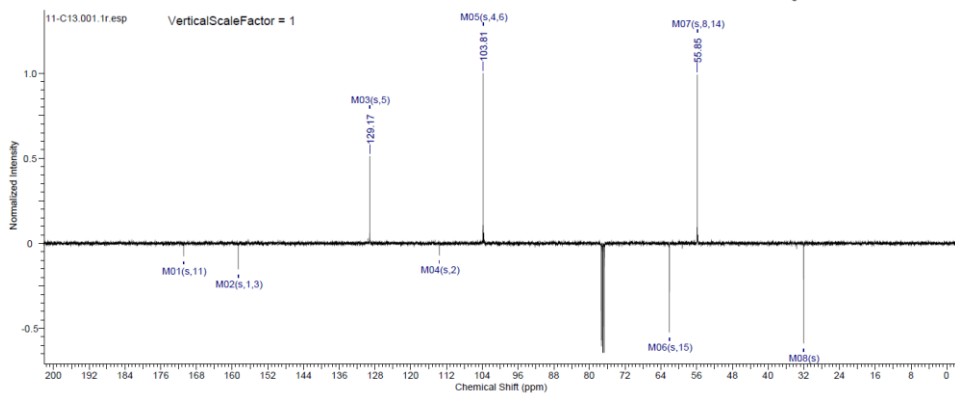

# Compound 16

MS ES+ :TIC Smooth (SG, 2x2)

2.2e+007

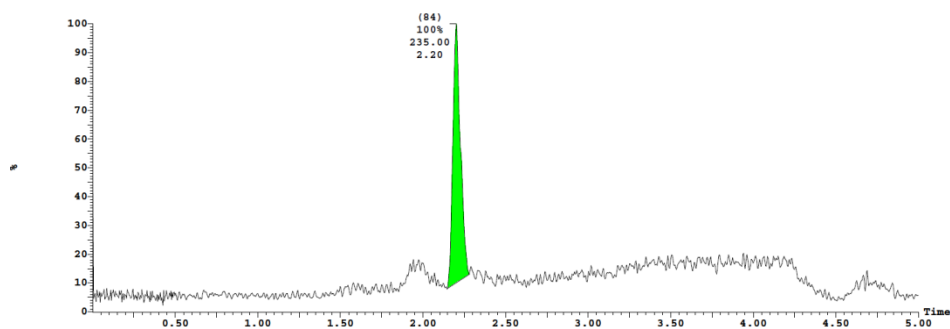

|                        |                      |                   |                |                        |                                                                                  |
|------------------------|----------------------|-------------------|----------------|------------------------|----------------------------------------------------------------------------------|
| Acquisition Time (sec) | 4.0894               | Comment           | OC_060_A       | Date                   | 21 Jan 2015 17:04:00                                                             |
| Date Stamp             | 21 Jan 2015 17:04:00 |                   |                | File Name              | \\hestia\work\chemistry\NMR Files\NMR_data\OCox\150121_OC_001-060A\10\data\11\tr |
| Frequency (MHz)        | 400.13               | Nucleus           | <sup>1</sup> H | Number of Transients   | 16                                                                               |
| Original Points Count  | 32768                | Owner             | sqcnmr         | Points Count           | 65536                                                                            |
| Receiver Gain          | 194.71               | SW(cyclical) (Hz) | 8012.82        | Solvent                | CHLOROFORM-d                                                                     |
| Spectrum Offset (Hz)   | 2434.1472            | Spectrum Type     | STANDARD       | Sweep Width (Hz)       | 8012.70                                                                          |
|                        |                      |                   |                | Temperature (degree C) | 25.157                                                                           |

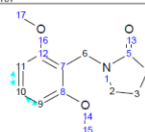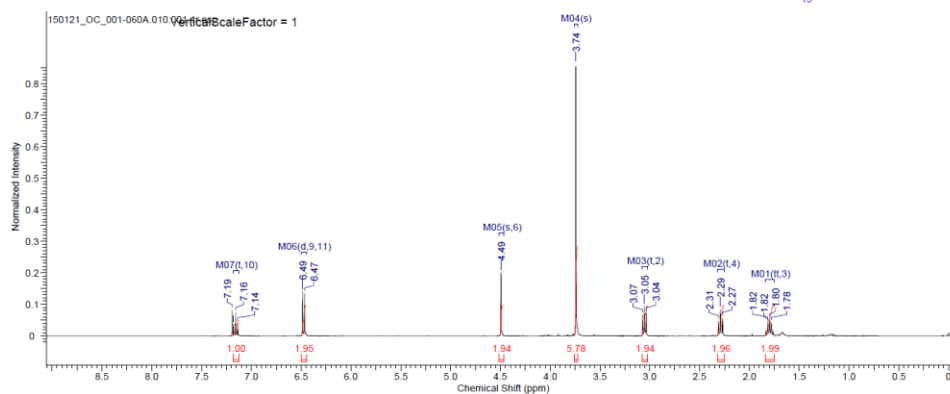

|                        |                      |                   |                 |                        |                                                                                      |
|------------------------|----------------------|-------------------|-----------------|------------------------|--------------------------------------------------------------------------------------|
| Acquisition Time (sec) | 1.3631               | Comment           | OC_060_A_C13    | Date                   | 22 Jan 2015 00:10:40                                                                 |
| Date Stamp             | 22 Jan 2015 00:10:40 |                   |                 | File Name              | \\hestia\work\chemistry\NMR Files\NMR_data\OCox\150121_OC_001-060A\11-C13\data\11\tr |
| Frequency (MHz)        | 100.61               | Nucleus           | <sup>13</sup> C | Number of Transients   | 1024                                                                                 |
| Original Points Count  | 32768                | Owner             | sqcnmr          | Points Count           | 32768                                                                                |
| Receiver Gain          | 194.71               | SW(cyclical) (Hz) | 24038.46        | Solvent                | CHLOROFORM-d                                                                         |
| Spectrum Offset (Hz)   | 10060.3320           | Spectrum Type     | APT             | Sweep Width (Hz)       | 24037.73                                                                             |
|                        |                      |                   |                 | Temperature (degree C) | 25.541                                                                               |

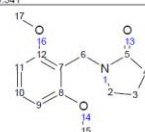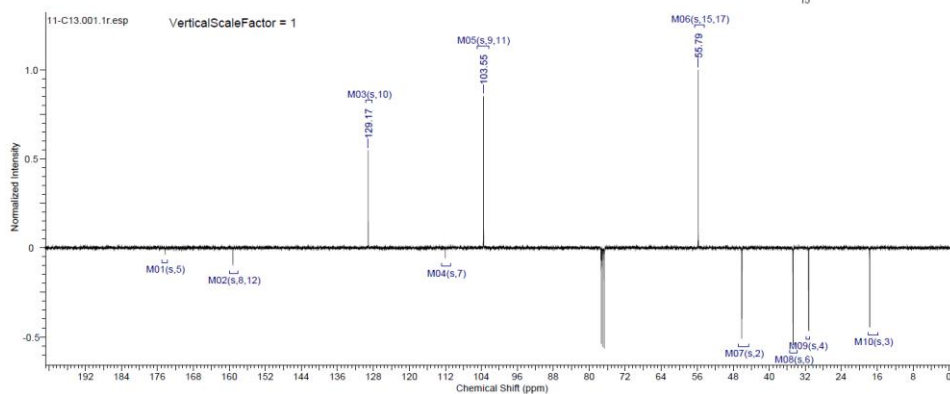

# Compound 17

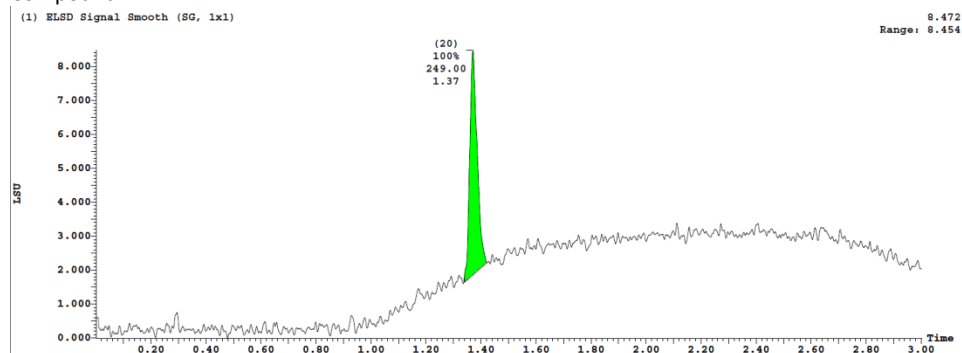

|                        |                      |                    |                                                                                         |                        |                      |
|------------------------|----------------------|--------------------|-----------------------------------------------------------------------------------------|------------------------|----------------------|
| Acquisition Time (sec) | 4.0894               | Comment            | OC 068_B                                                                                | Date                   | 12 Feb 2015 09:10:24 |
| Date Stamp             | 12 Feb 2015 09:10:24 | File Name          | \\hestia\work\chemistry\NMR Files\NMR_data\OCox150212_OC_001-068B_column2\10\data\11\tr |                        |                      |
| Frequency (MHz)        | 400.13               | Nucleus            | <sup>1</sup> H                                                                          | Number of Transients   | 16                   |
| Original Points Count  | 32768                | Owner              | sgcnmr                                                                                  | Points Count           | 65536                |
| Receiver Gain          | 155.34               | SW (cyclical) (Hz) | 8012.82                                                                                 | Pulse Sequence         | zg30                 |
| Spectrum Offset (Hz)   | 2470.9668            | Spectrum Type      | STANDARD                                                                                | Solvent                | CHLOROFORM-d         |
|                        |                      | Sweep Width (Hz)   | 8012.70                                                                                 | Temperature (degree C) | 25.157               |

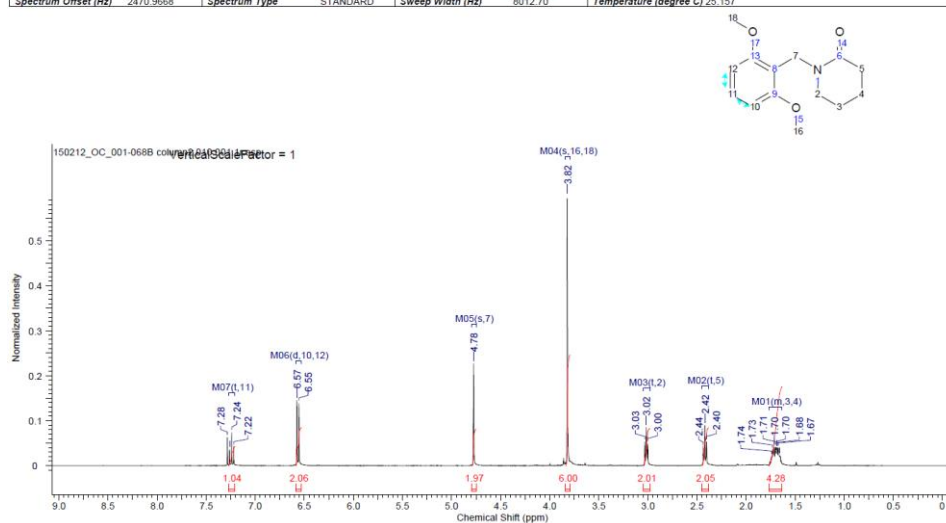

|                        |                      |                        |                                                                                             |                      |                      |
|------------------------|----------------------|------------------------|---------------------------------------------------------------------------------------------|----------------------|----------------------|
| Acquisition Time (sec) | 1.3631               | Comment                | OC_068_B_C13                                                                                | Date                 | 12 Feb 2015 21:02:56 |
| Date Stamp             | 12 Feb 2015 21:02:56 | File Name              | \\hestia\work\chemistry\NMR Files\NMR_data\OCox150212_OC_001-068B_column2\11-C13\data\11\tr |                      |                      |
| Nucleus                | <sup>13</sup> C      | Number of Transients   | 1024                                                                                        | Origin               | Spect                |
| Owner                  | sgcnmr               | Points Count           | 32768                                                                                       | Pulse Sequence       | jmod                 |
| SW (cyclical) (Hz)     | 24038.46             | Solvent                | CHLOROFORM-d                                                                                | Receiver Gain        | 194.71               |
| Spectrum Type          | APT                  | Sweep Width (Hz)       | 24037.73                                                                                    | Spectrum Offset (Hz) | 10060.3320           |
|                        |                      | Temperature (degree C) | 25.162                                                                                      |                      |                      |

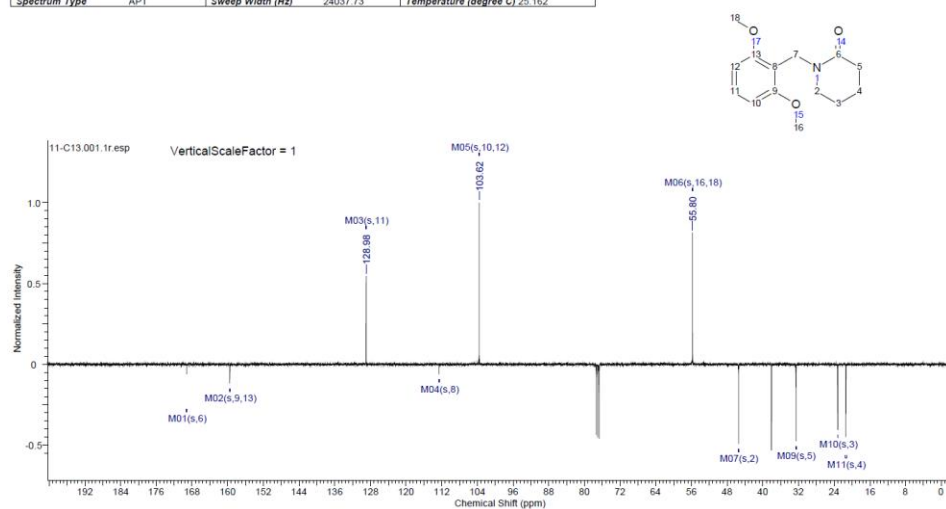

# Compound 19

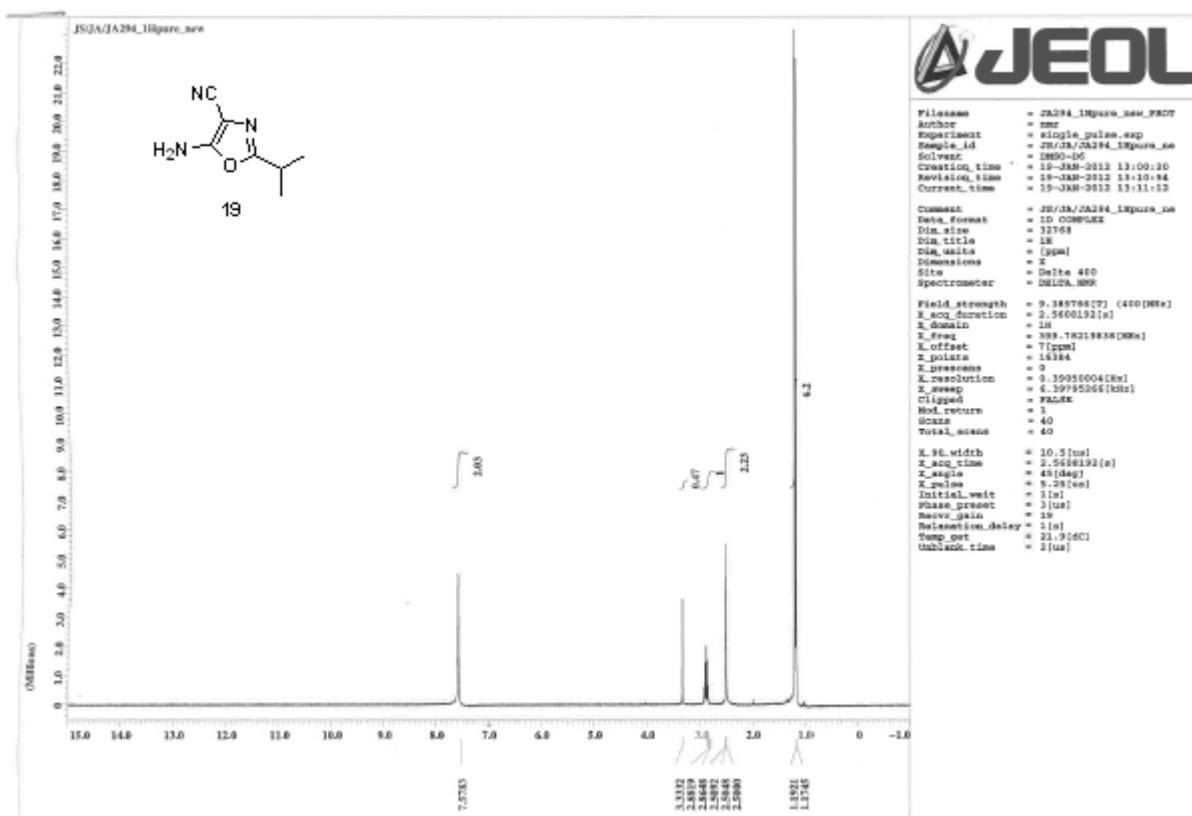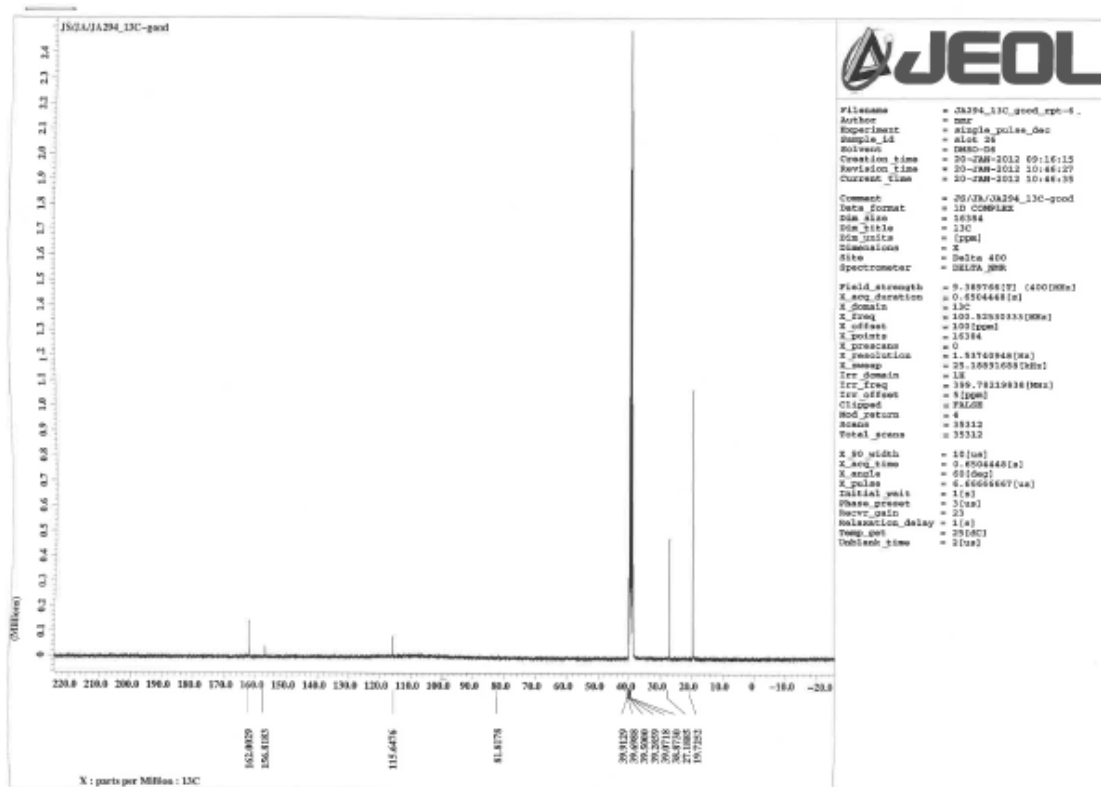

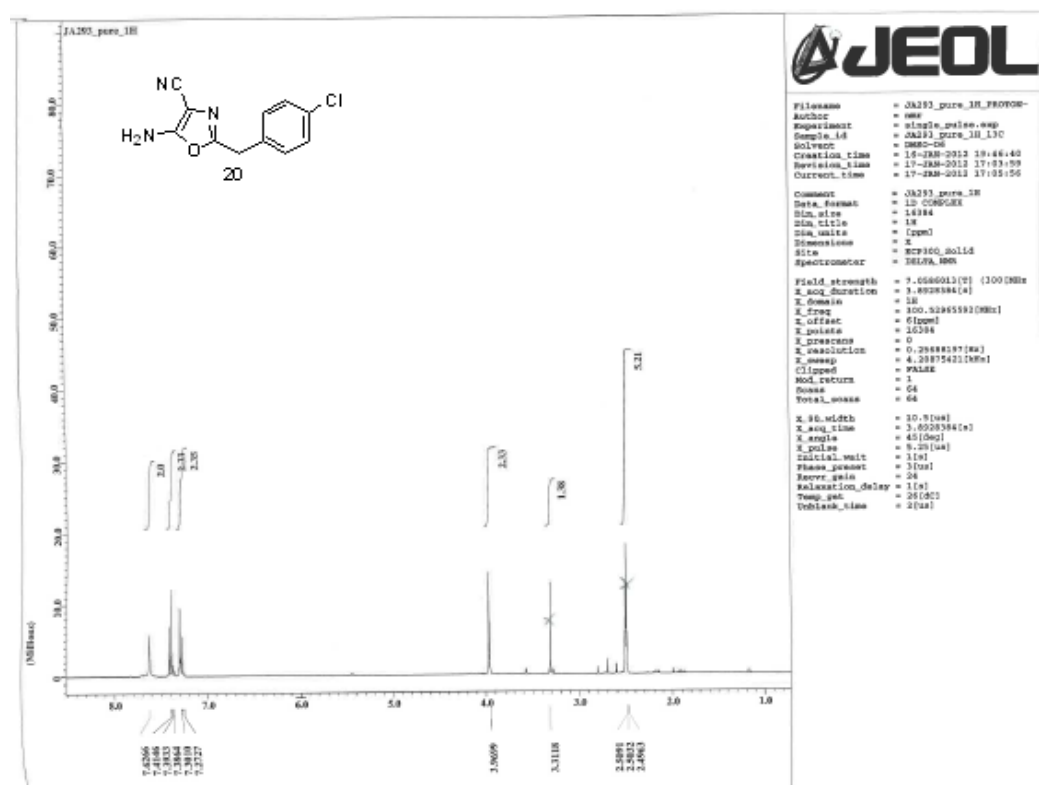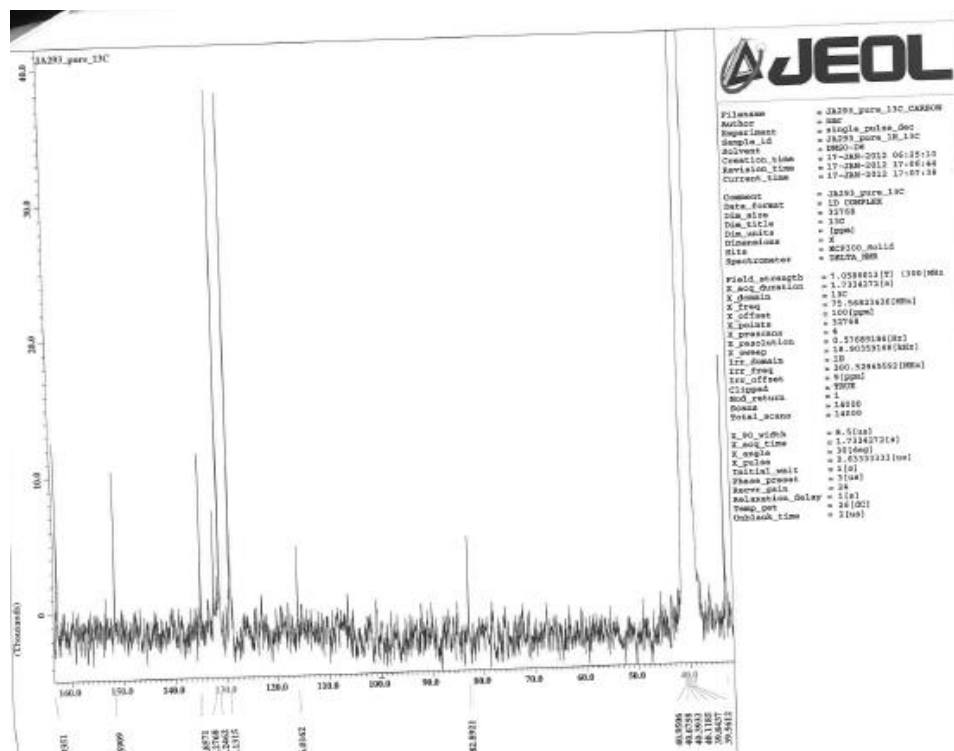



(1) ELSD Signal Smooth (SG, 1x1)

15.729  
Range: 15.702

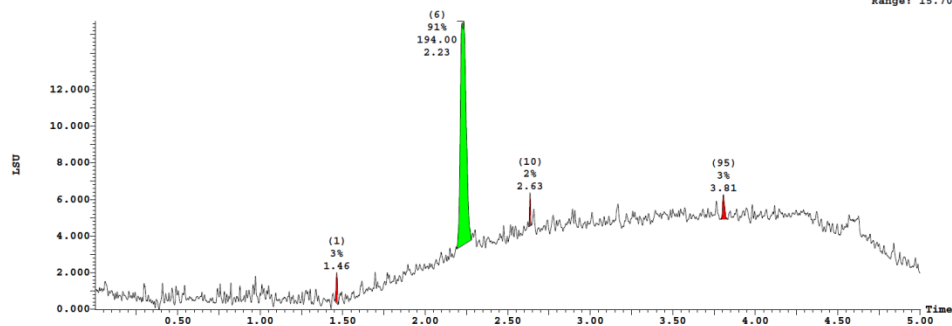

|                        |                      |                    |                |                        |                                                                                   |
|------------------------|----------------------|--------------------|----------------|------------------------|-----------------------------------------------------------------------------------|
| Acquisition Time (sec) | 4.0894               | Comment            | OC_040_F.H1    | Date                   | 09 Aug 2014 01:19:12                                                              |
| Date Stamp             | 09 Aug 2014 01:19:12 |                    |                | File Name              | \\hesla\work\chemistry\NMR Files\NMR_data\OC0x140808_OC_001-040\F12-H1\pdata1\11r |
| Frequency (MHz)        | 400.13               | Nucleus            | <sup>1</sup> H | Number of Transients   | 16                                                                                |
| Original Points Count  | 32768                | Owner              | 99cmr          | Origin                 | Spec                                                                              |
| Receiver Gain          | 194.71               | SF (cyclical) (Hz) | 599cmr         | Pulse Sequence         | zg30                                                                              |
| Spectrum Offset (Hz)   | 2470.9668            | Spectrum Type      | STD            | Solvent                | CHLOROFORM-d                                                                      |
|                        |                      |                    | 12.82          | Sweep Width (Hz)       | 8012.70                                                                           |
|                        |                      |                    |                | Temperature (degree C) | 25.149                                                                            |

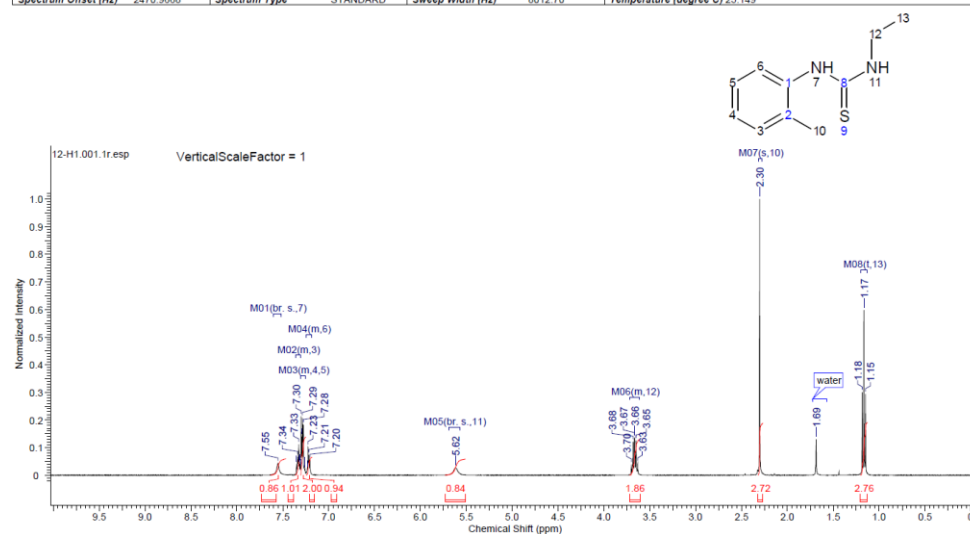

|                        |                      |                     |                 |                        |                                                                  |
|------------------------|----------------------|---------------------|-----------------|------------------------|------------------------------------------------------------------|
| Acquisition Time (sec) | 1.3631               | Comment             | OC_040_F_C13    | Date                   | 09 Aug 2014 01:17:04                                             |
| Date Stamp             | 09 Aug 2014 01:17:04 |                     |                 |                        |                                                                  |
| Frequency (MHz)        | 100.61               | Nucleus             | <sup>13</sup> C | File Name              | \\hesita\work\chemistry\NMR Files\NMR_data\OC040\11-C13\data\11f |
| Frequency Points Count | 100658               | Q-resolution        | snacmr          | Number of Transients   | 1924                                                             |
| Receiver Gain          | 194.71               | SWH (cycles/s)      | 24039.46        | Points Count           | 32747                                                            |
| Spectrum Offset (Hz)   | 10060.3320           | Chemical Shift (Hz) | APT             | Solvent                | CHLOROFORM-d                                                     |
|                        |                      |                     |                 | Solvent Width (Hz)     | 24037.73                                                         |
|                        |                      |                     |                 | Temperature (degree C) | 25.161                                                           |

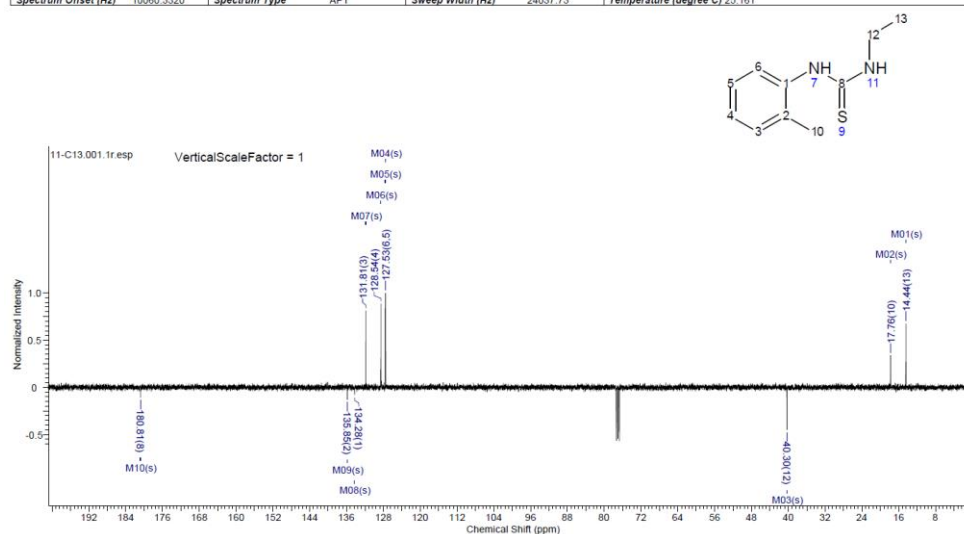

# Compound s2

UV Detector: 254 Smooth (SG, 1x1)

1.197e-1  
Range: 1.196e-1

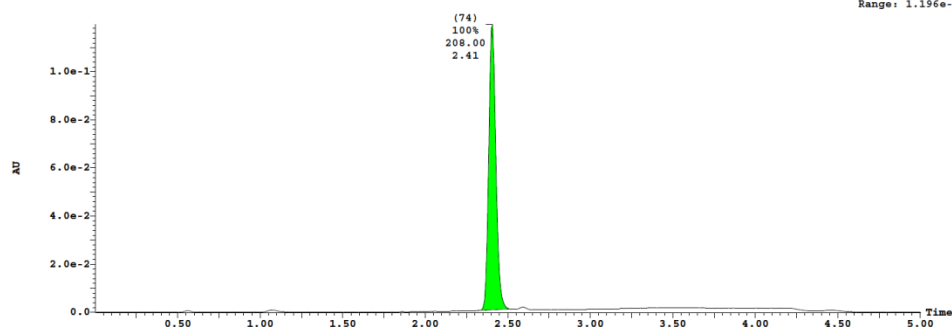

|                        |                      |                    |                                                                  |                        |                      |
|------------------------|----------------------|--------------------|------------------------------------------------------------------|------------------------|----------------------|
| Acquisition Time (sec) | 4.0894               | Comment            | OC 040 E H1                                                      | Date                   | 08 Aug 2014 23:13:20 |
| Date Stamp             | 08 Aug 2014 23:13:20 | File Name          | \\hestia\work\chemistry\NMR Files\NMR_data\OC040E12-H1\data\111r |                        |                      |
| Frequency (MHz)        | 400.13               | Nucleus            | <sup>1</sup> H                                                   | Number of Transients   | 16                   |
| Original Points Count  | 32768                | Owner              | sqcmmr                                                           | Points Count           | 65536                |
| Receiver Gain          | 194.71               | SW (cyclical) (Hz) | 8012.82                                                          | Pulse Sequence         | zg30                 |
| Spectrum Offset (Hz)   | 2470.9668            | Solvent            | CHLOROFORM-d                                                     | Spectrum Type          | STANDARD             |
|                        |                      | Sweep Width (Hz)   | 8012.70                                                          | Temperature (degree C) | 25.151               |

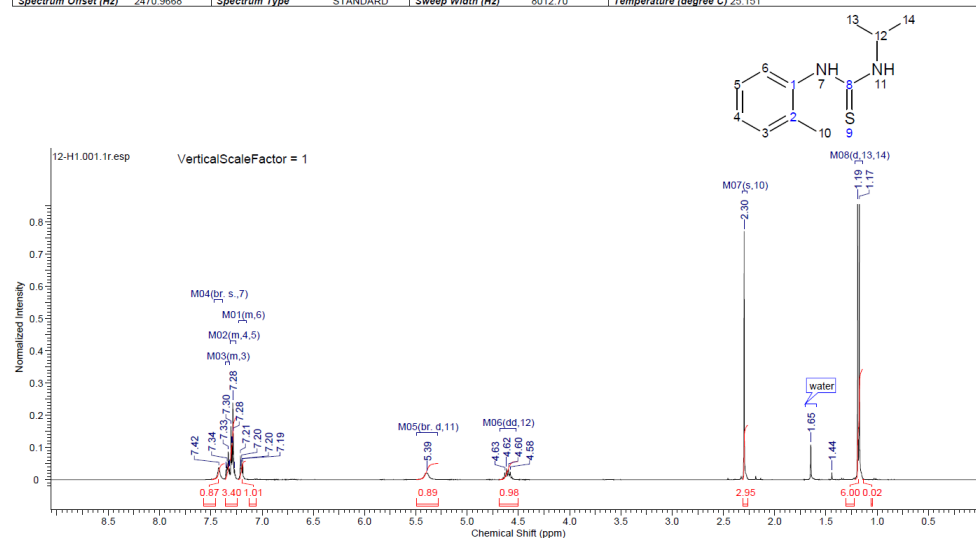

|                        |                      |                    |                                                                   |                        |                      |
|------------------------|----------------------|--------------------|-------------------------------------------------------------------|------------------------|----------------------|
| Acquisition Time (sec) | 1.3631               | Comment            | OC 040 E C13                                                      | Date                   | 08 Aug 2014 23:11:12 |
| Date Stamp             | 08 Aug 2014 23:11:12 | File Name          | \\hestia\work\chemistry\NMR Files\NMR_data\OC040E11-C13\data\111r |                        |                      |
| Frequency (MHz)        | 100.61               | Nucleus            | <sup>13</sup> C                                                   | Number of Transients   | 1024                 |
| Original Points Count  | 32768                | Owner              | sqcmmr                                                            | Points Count           | 32768                |
| Receiver Gain          | 194.71               | SW (cyclical) (Hz) | 24038.46                                                          | Pulse Sequence         | jmod                 |
| Spectrum Offset (Hz)   | 10060.3320           | Solvent            | CHLOROFORM-d                                                      | Spectrum Type          | APT                  |
|                        |                      | Sweep Width (Hz)   | 24037.73                                                          | Temperature (degree C) | 25.161               |

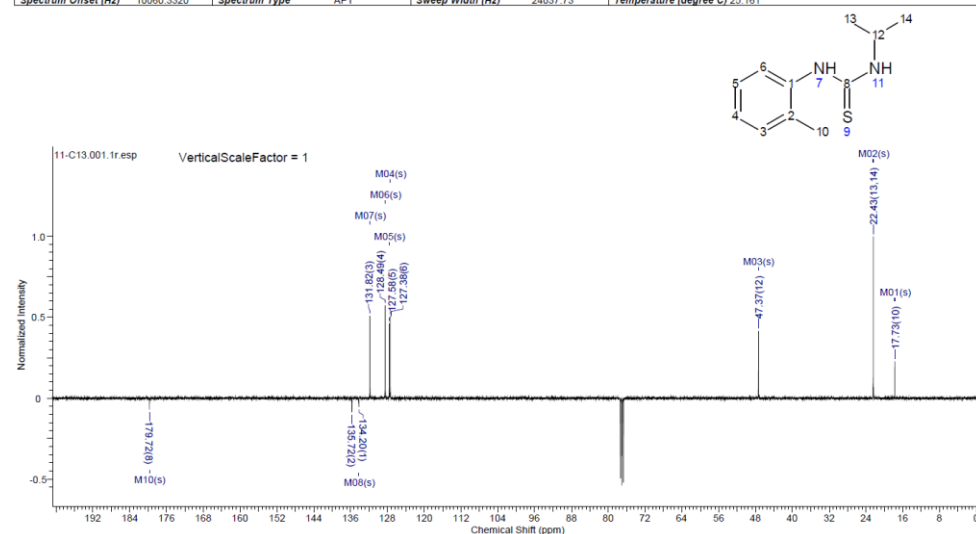

# Compound s3

UV Detector: 254 Smooth (S0, 1x1)

2.621e-1  
Range: 2.621e-1

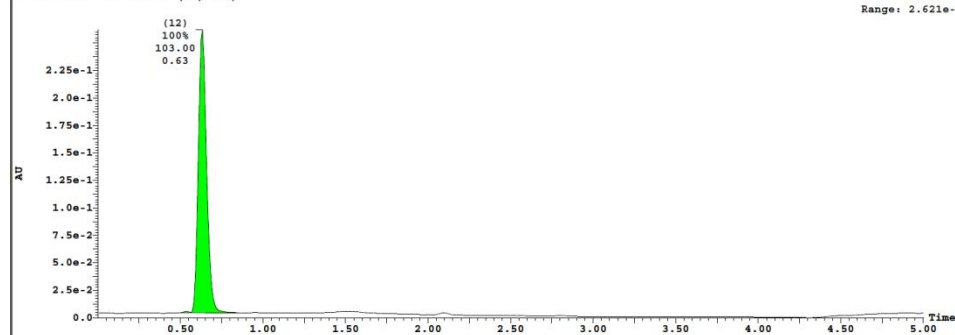

|                        |                      |                   |                                                                                 |                        |                      |
|------------------------|----------------------|-------------------|---------------------------------------------------------------------------------|------------------------|----------------------|
| Acquisition Time (sec) | 4.0894               | Comment           | OC_031 A H1                                                                     | Date                   | 12 Jul 2014 01:00:00 |
| Date Stamp             | 12 Jul 2014 01:00:00 | File Name         | \hstet\work\chemistry\NMR Files\NMR_data\OCox140710_OC_001-031A\12 H1\data\111r |                        |                      |
| Frequency (MHz)        | 400.13               | Nucleus           | <sup>1</sup> H                                                                  | Number of Transients   | 16                   |
| Original Points Count  | 32768                | Owner             | sgcnmr                                                                          | Points Count           | 65536                |
| Receiver Gain          | 194.71               | SW(cyclical) (Hz) | 8012.82                                                                         | Solvent                | DMSO-d6              |
| Spectrum Type          | STANDARD             | Sweep Width (Hz)  | 8012.70                                                                         | Temperature (degree C) | 25.156               |
|                        |                      |                   |                                                                                 | Pulse Sequence         | zg30                 |
|                        |                      |                   |                                                                                 | Spectrum Offset (Hz)   | 2467.8220            |

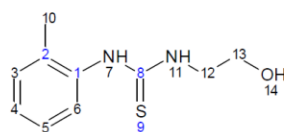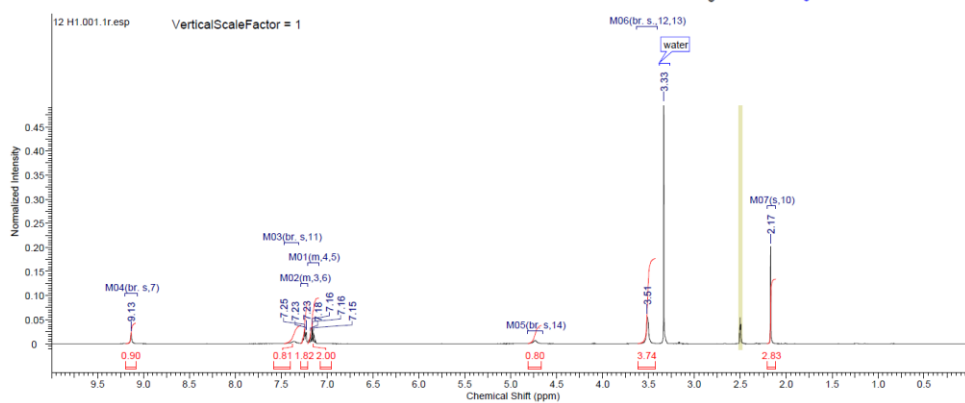

|                        |                      |                   |                                                                                  |                        |                      |
|------------------------|----------------------|-------------------|----------------------------------------------------------------------------------|------------------------|----------------------|
| Acquisition Time (sec) | 1.3631               | Comment           | OC_031 A C13                                                                     | Date                   | 12 Jul 2014 00:38:40 |
| Date Stamp             | 12 Jul 2014 00:38:40 | File Name         | \hstet\work\chemistry\NMR Files\NMR_data\OCox140710_OC_001-031A\10 C13\data\111r |                        |                      |
| Frequency (MHz)        | 100.61               | Nucleus           | <sup>13</sup> C                                                                  | Number of Transients   | 1024                 |
| Original Points Count  | 32768                | Owner             | sgcnmr                                                                           | Points Count           | 32768                |
| Receiver Gain          | 194.71               | SW(cyclical) (Hz) | 24038.46                                                                         | Solvent                | DMSO-d6              |
| Spectrum Type          | STANDARD             | Sweep Width (Hz)  | 24037.73                                                                         | Temperature (degree C) | 25.160               |
|                        |                      |                   |                                                                                  | Pulse Sequence         | zgpg30               |
|                        |                      |                   |                                                                                  | Spectrum Offset (Hz)   | 10059.8594           |

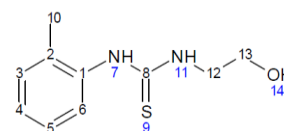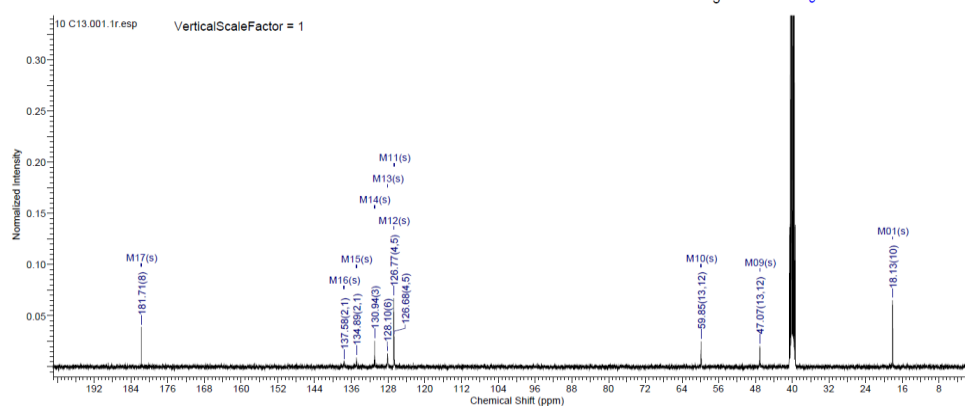

# Compound s4

(1) ELSD Signal Smooth (8G, 1x1)

20.323  
Range: 20.287

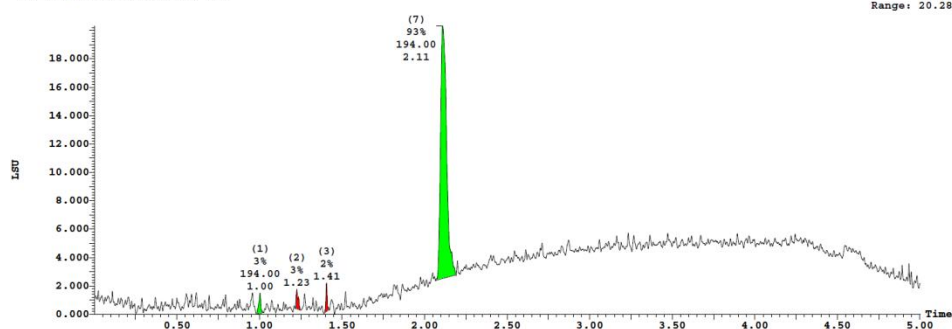

|                        |                      |                    |                |                        |                                                                                 |
|------------------------|----------------------|--------------------|----------------|------------------------|---------------------------------------------------------------------------------|
| Acquisition Time (sec) | 4.0894               | Comment            | OC_040_G_H1    | Date                   | 07 Aug 2014 21:05:20                                                            |
| Date Stamp             | 07 Aug 2014 21:05:20 |                    |                | File Name              | \\hestia\work\chemistry\NMR Files\NMR_data\OCox140807_OC_001-040G12-H1\data\11r |
| Frequency (MHz)        | 400.13               | Nucleus            | <sup>1</sup> H | Number of Transients   | 16                                                                              |
| Original Points Count  | 32768                | Owner              | sqcnmr         | Points Count           | 65536                                                                           |
| Receiver Gain          | 77.20                | SW (cyclical) (Hz) | 8012.82        | Pulse Sequence         | zg30                                                                            |
| Spectrum Type          | STANDARD             | Sweep Width (Hz)   | 8012.70        | Solvent                | DMSO-d6                                                                         |
|                        |                      |                    |                | Spectrum Offset (Hz)   | 2470.9668                                                                       |
|                        |                      |                    |                | Temperature (degree C) | 25.143                                                                          |

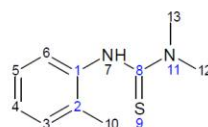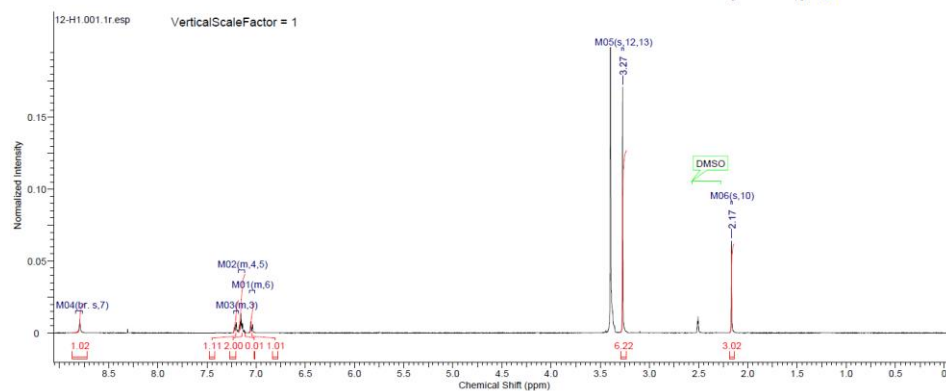

|                        |                      |                    |                 |                        |                                                                                  |
|------------------------|----------------------|--------------------|-----------------|------------------------|----------------------------------------------------------------------------------|
| Acquisition Time (sec) | 1.3631               | Comment            | OC_040_G_C13    | Date                   | 07 Aug 2014 21:03:12                                                             |
| Date Stamp             | 07 Aug 2014 21:03:12 |                    |                 | File Name              | \\hestia\work\chemistry\NMR Files\NMR_data\OCox140807_OC_001-040G11-C13\data\11r |
| Frequency (MHz)        | 100.61               | Nucleus            | <sup>13</sup> C | Number of Transients   | 1024                                                                             |
| Original Points Count  | 32768                | Owner              | sqcnmr          | Points Count           | 32768                                                                            |
| Receiver Gain          | 184.71               | SW (cyclical) (Hz) | 24038.46        | Pulse Sequence         | jmod                                                                             |
| Spectrum Type          | APT                  | Sweep Width (Hz)   | 24037.73        | Solvent                | DMSO-d6                                                                          |
|                        |                      |                    |                 | Spectrum Offset (Hz)   | 10060.3320                                                                       |
|                        |                      |                    |                 | Temperature (degree C) | 25.161                                                                           |

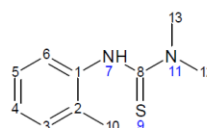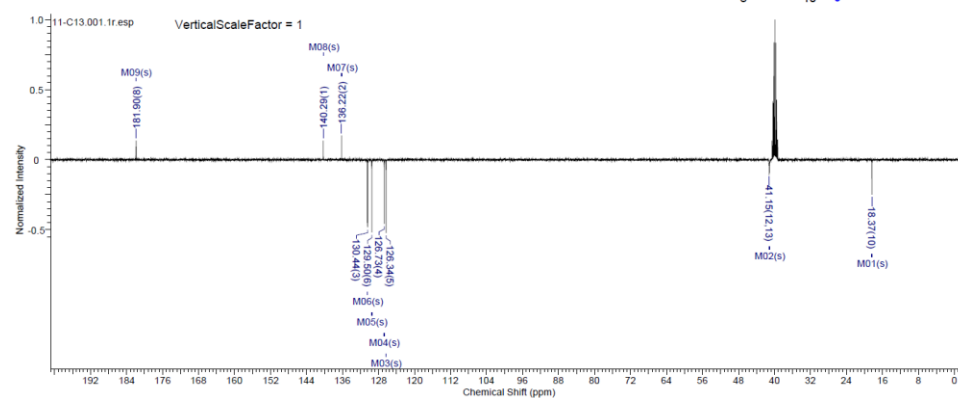

# Compound s5

(1) ELSD Signal Smooth (SG, 1x1)

14.939  
Range: 14.890

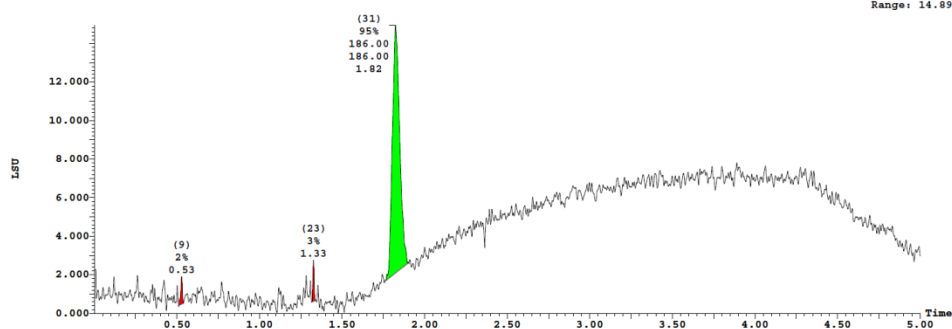

|                        |                      |                    |                |                        |                                                                  |
|------------------------|----------------------|--------------------|----------------|------------------------|------------------------------------------------------------------|
| Acquisition Time (sec) | 4.0894               | Comment            | OC 053 D H1    | Date                   | 12 Dec 2014 16:40:32                                             |
| Date Stamp             | 12 Dec 2014 16:40:32 |                    |                | File Name              | \\hestia\work\chemistry\NMR Files\NMR_data\OC053D10-H1\data\111r |
| Frequency (MHz)        | 400.13               | Nucleus            | <sup>1</sup> H | Number of Transients   | 16                                                               |
| Original Points Count  | 32768                | Owner              | sqcmr          | Points Count           | 65536                                                            |
| Receiver Gain          | 194.71               | SW (cyclical) (Hz) | 8012.82        | Pulse Sequence         | zg30                                                             |
| Spectrum Type          | STANDARD             | Sweep Width (Hz)   | 8012.70        | Solvent                | DMSO-d6                                                          |
|                        |                      |                    |                | Spectrum Offset (Hz)   | 2470.9668                                                        |
|                        |                      |                    |                | Temperature (degree C) | 25.159                                                           |

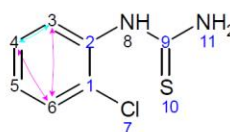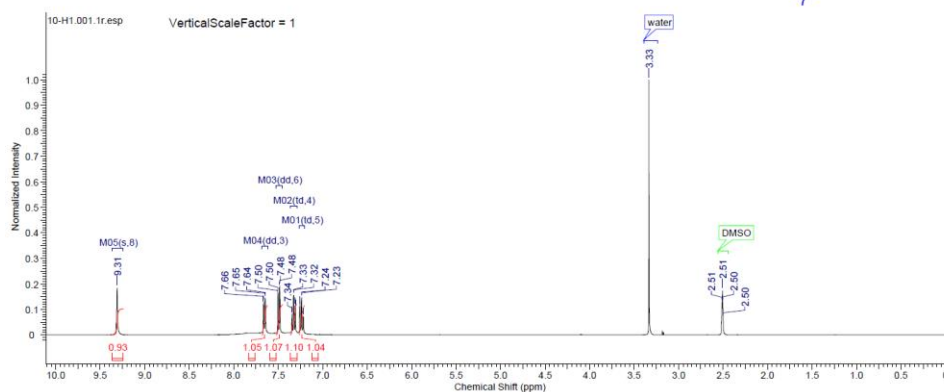

|                        |                      |                    |                 |                        |                                                                   |
|------------------------|----------------------|--------------------|-----------------|------------------------|-------------------------------------------------------------------|
| Acquisition Time (sec) | 1.3631               | Comment            | OC 053 D C13    | Date                   | 13 Dec 2014 08:10:40                                              |
| Date Stamp             | 13 Dec 2014 08:10:40 |                    |                 | File Name              | \\hestia\work\chemistry\NMR Files\NMR_data\OC053D11-C13\data\111r |
| Frequency (MHz)        | 100.61               | Nucleus            | <sup>13</sup> C | Number of Transients   | 1024                                                              |
| Original Points Count  | 32768                | Owner              | sqcmr           | Points Count           | 32768                                                             |
| Receiver Gain          | 194.71               | SW (cyclical) (Hz) | 24038.46        | Pulse Sequence         | jmod                                                              |
| Spectrum Type          | APT                  | Sweep Width (Hz)   | 24037.73        | Solvent                | DMSO-d6                                                           |
|                        |                      |                    |                 | Spectrum Offset (Hz)   | 10060.3320                                                        |
|                        |                      |                    |                 | Temperature (degree C) | 25.423                                                            |

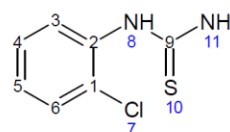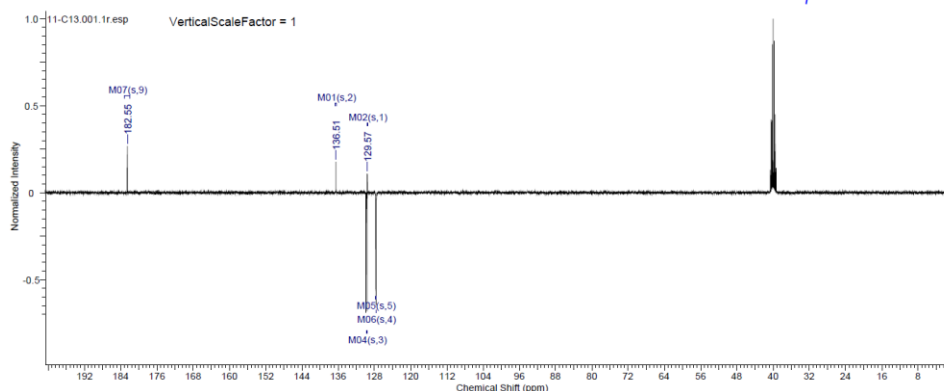

(1) ELSD Signal Smooth (SG, 1x1)

11.949  
Range: 11.797

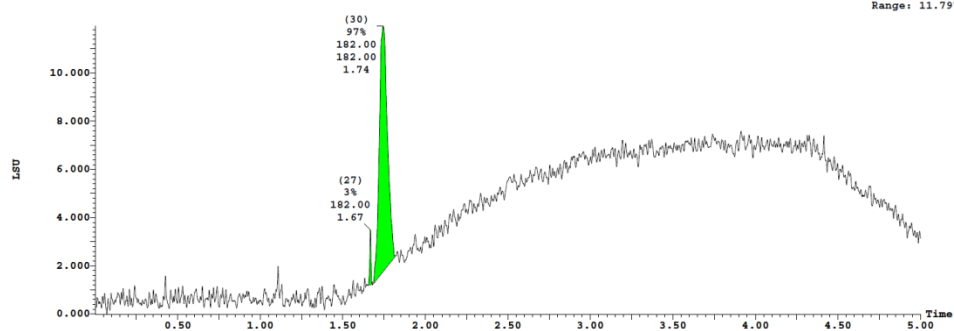

|                               |                      |                         |                |                                |                                                                               |
|-------------------------------|----------------------|-------------------------|----------------|--------------------------------|-------------------------------------------------------------------------------|
| <b>Acquisition Time (sec)</b> | 4.0894               | <b>Comment</b>          | OC_053_E       | <b>Date</b>                    | 05 Dec 2014 12:30:56                                                          |
| <b>Date Stamp</b>             | 05 Dec 2014 12:30:56 |                         |                | <b>File Name</b>               | \\hetalawork\kristin\NMR Files\NMR\data\OCox141205_OC_001-053E10-H1\data111.r |
| <b>Frequency (MHz)</b>        | 400.13               | <b>Nucleus</b>          | <sup>1</sup> H | <b>Number of Transients</b>    | 16                                                                            |
| <b>Original Points Count</b>  | 32768                | <b>sgconv</b>           |                | <b>Points Count</b>            | 65336                                                                         |
| <b>Receiver Gain</b>          | 194.71               | <b>SWH (cycles/s)</b>   | 1012.82        | <b>Solvent</b>                 | DMSO-d <sub>6</sub>                                                           |
| <b>Spectrum Type</b>          | STANDARD             | <b>SWH (Width (Hz))</b> | 4012.20        | <b>Temperature (degrees C)</b> | 25.150                                                                        |
|                               |                      | <b>Resolution (Hz)</b>  | 0.1017         | <b>Pulse Sequence</b>          | zgpg30                                                                        |
|                               |                      |                         |                | <b>Spectrum Offset (Hz)</b>    | 2430.9658                                                                     |

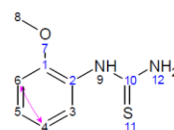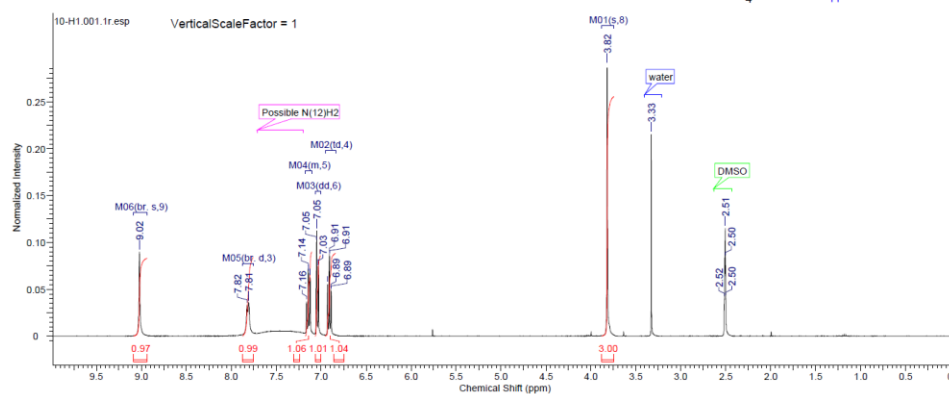

|                        |                      |                        |                |                      |                                                                                   |
|------------------------|----------------------|------------------------|----------------|----------------------|-----------------------------------------------------------------------------------|
| Acquisition Time (sec) | 1.3631               | Comment                | QC_053_E_C13   | Date                 | 06 Dec 2014 10 44:16                                                              |
| Date Stamp             | 06 Dec 2014 10 44:16 |                        |                |                      |                                                                                   |
| Original Points Count  | 32768                | Nucleus                | <sup>1</sup> H | File Name            | 1024\liveslwork\chemstry\NMR Files\NMR_data\QC0411205_QC_001-053E\11-C13\data\11r |
| Receiver Gain          | 194.71               | Owner                  | sgcmr          | Number of Transients | 1024                                                                              |
| Spectrum Type          | APT                  | Sweep Width (Hz)       | 24037.3        | Points Count         | 32768                                                                             |
|                        |                      | SWH(cyclical) (Hz)     | 24038.46       | Pulse Sequence       | zgpg30                                                                            |
|                        |                      | Temperature (degree C) | 25.42          | Spectrum Offset (Hz) | 10050.3320                                                                        |

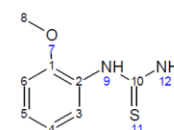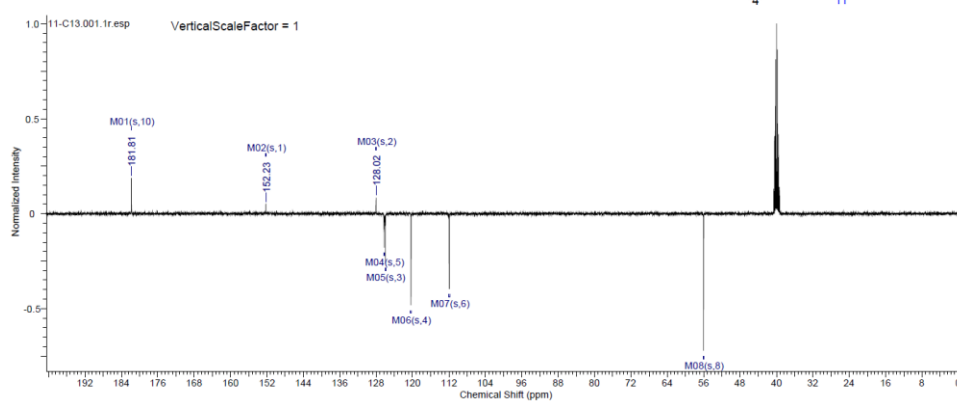

# Compound s8

UV Detector: 254 Smooth (S0, 1x1)

Range: 4.093e-2

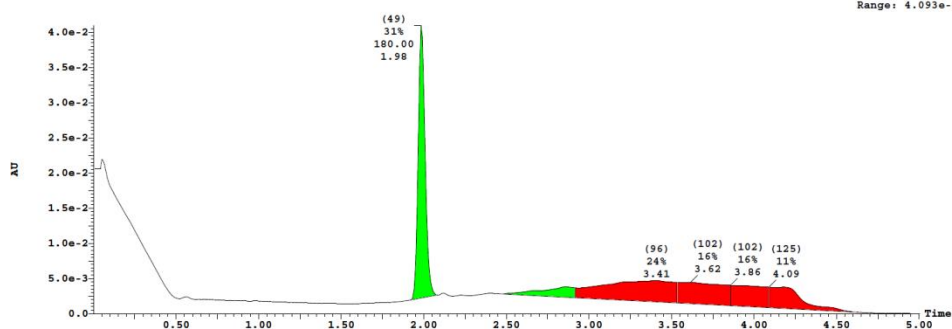

|                        |                      |                   |                |                        |                                                                 |
|------------------------|----------------------|-------------------|----------------|------------------------|-----------------------------------------------------------------|
| Acquisition Time (sec) | 4.0934               | Comment           | OC 039 C H1    | Date                   | 05 Aug 2014 04:45:08                                            |
| Date Stamp             | 05 Aug 2014 04:46:38 |                   |                | File Name              | \\hesla\work\chemistry\NMR Files\NMR_data\OC039C12-H1\data\11tr |
| Frequency (MHz)        | 400.13               | Nucleus           | <sup>1</sup> H | Number of Transients   | 16                                                              |
| Original Points Count  | 32768                | Owner             | sgcnmr         | Points Count           | 65536                                                           |
| Receiver Gain          | 194.71               | SW(cyclical) (Hz) | 8012.82        | Solvent                | DMSO-d6                                                         |
| Spectrum Type          | STANDARD             | Sweep Width (Hz)  | 8012.70        | Temperature (degree C) | 25.151                                                          |
|                        |                      |                   |                | Pulse Sequence         | zg30                                                            |
|                        |                      |                   |                | Spectrum Offset (Hz)   | 2470.9668                                                       |

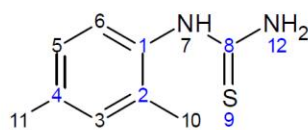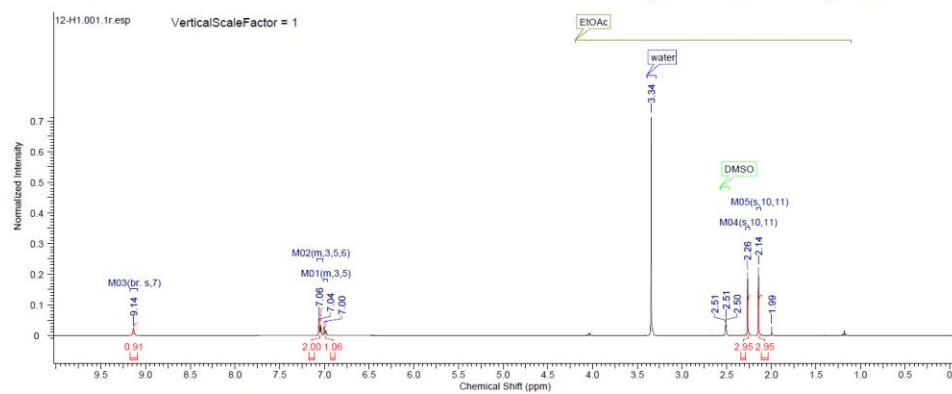

|                        |                      |                   |                 |                        |                                                                  |
|------------------------|----------------------|-------------------|-----------------|------------------------|------------------------------------------------------------------|
| Acquisition Time (sec) | 1.3631               | Comment           | OC 039 C C13    | Date                   | 05 Aug 2014 04:44:00                                             |
| Date Stamp             | 05 Aug 2014 04:44:00 |                   |                 | File Name              | \\hesla\work\chemistry\NMR Files\NMR_data\OC039C11-C13\data\11tr |
| Frequency (MHz)        | 100.61               | Nucleus           | <sup>13</sup> C | Number of Transients   | 1024                                                             |
| Original Points Count  | 32768                | Owner             | sgcnmr          | Points Count           | 32768                                                            |
| Receiver Gain          | 194.71               | SW(cyclical) (Hz) | 24038.46        | Solvent                | DMSO-d6                                                          |
| Spectrum Type          | APT                  | Sweep Width (Hz)  | 24037.73        | Temperature (degree C) | 25.161                                                           |
|                        |                      |                   |                 | Pulse Sequence         | inhad                                                            |
|                        |                      |                   |                 | Spectrum Offset (Hz)   | 10060.3320                                                       |

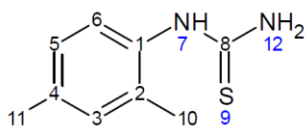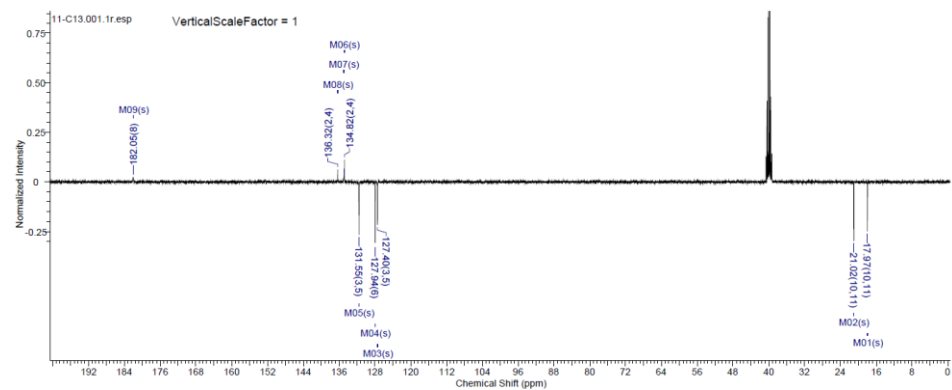

# Compound s9

UV Detector: 254 Smooth (SG, 1x1)

7.397e-1  
Range: 7.397e-1

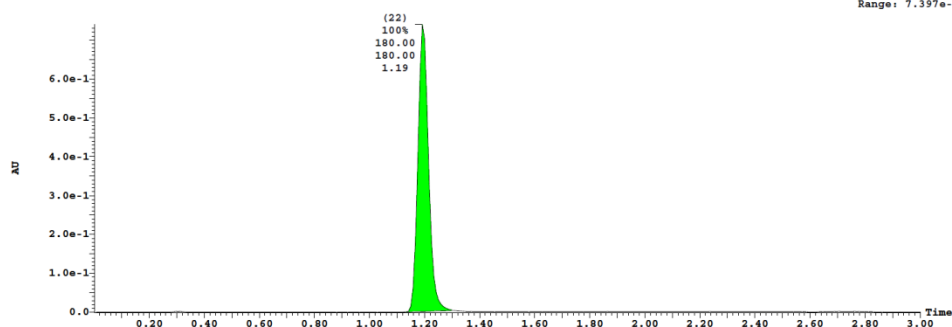

|                        |                      |                        |                                                                                   |                      |                      |
|------------------------|----------------------|------------------------|-----------------------------------------------------------------------------------|----------------------|----------------------|
| Acquisition Time (sec) | 4.0894               | Comment                | OC_039_D_H1                                                                       | Date                 | 05 Aug 2014 02:40:16 |
| Date Stamp             | 05 Aug 2014 02:40:16 | File Name              | \hstslawork\chemistry\NMR Files\NMR_data\OCox\140804_OC_001-039D\11-H1\pdata\111r |                      |                      |
| Frequency (MHz)        | 400.13               | Nucleus                | 1H                                                                                | Number of Transients | 16                   |
| Original Points Count  | 32768                | Owner                  | sqcmmr                                                                            | Points Count         | 65536                |
| Receiver Gain          | 194.71               | SW(cyclical) (Hz)      | 8012.82                                                                           | Pulse Sequence       | zg30                 |
| Spectrum Type          | STANDARD             | Sweep Width (Hz)       | 8012.70                                                                           | Spectrum Offset (Hz) | 2470.9668            |
|                        |                      | Temperature (degree C) | 25.153                                                                            |                      |                      |

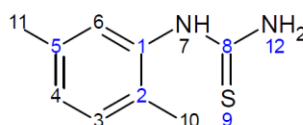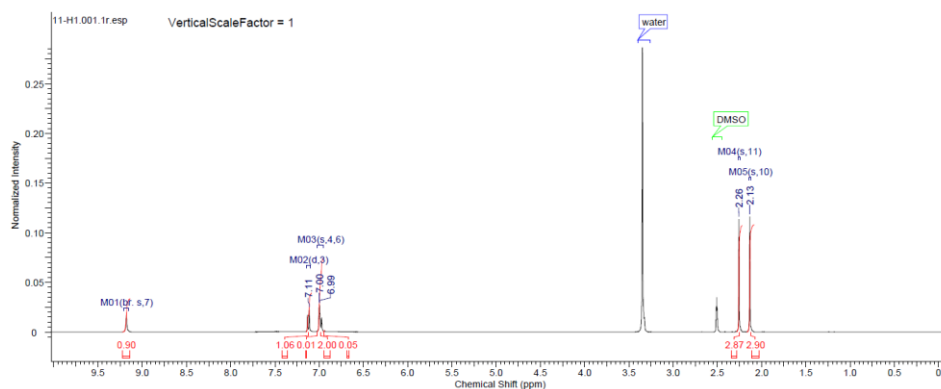

|                        |                      |                        |                                                                                    |                      |                      |
|------------------------|----------------------|------------------------|------------------------------------------------------------------------------------|----------------------|----------------------|
| Acquisition Time (sec) | 1.3631               | Comment                | OC_039_D_C13                                                                       | Date                 | 05 Aug 2014 02:38:08 |
| Date Stamp             | 05 Aug 2014 02:38:08 | File Name              | \hstslawork\chemistry\NMR Files\NMR_data\OCox\140804_OC_001-039D\15-C13\pdata\111r |                      |                      |
| Frequency (MHz)        | 100.61               | Nucleus                | 13C                                                                                | Number of Transients | 1024                 |
| Original Points Count  | 32768                | Owner                  | sqcmmr                                                                             | Points Count         | 32768                |
| Receiver Gain          | 194.71               | SW(cyclical) (Hz)      | 24038.46                                                                           | Pulse Sequence       | jmod                 |
| Spectrum Type          | APT                  | Sweep Width (Hz)       | 24037.73                                                                           | Spectrum Offset (Hz) | 10060.3320           |
|                        |                      | Temperature (degree C) | 25.158                                                                             |                      |                      |

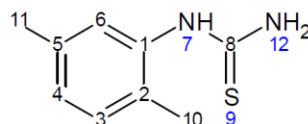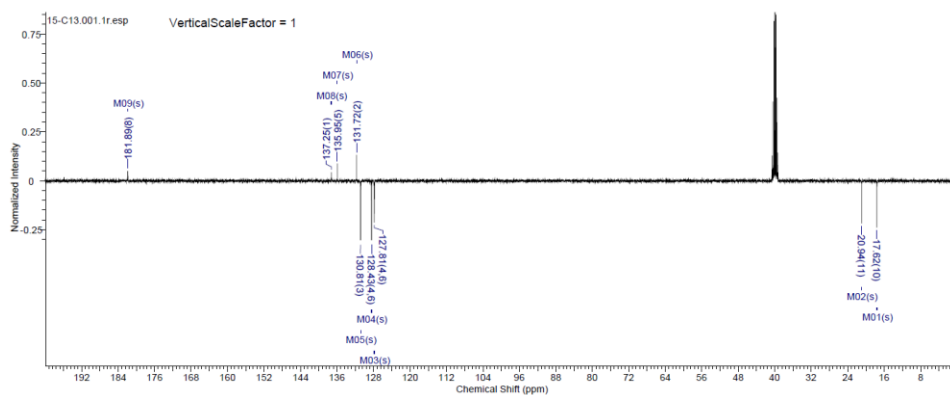



(1) ELSD Signal Smooth (SG, 1x1)

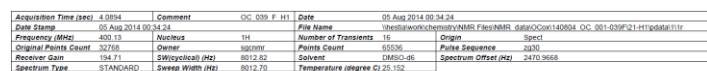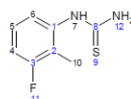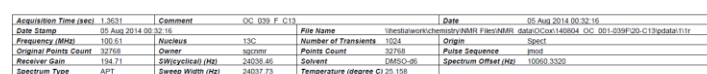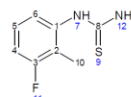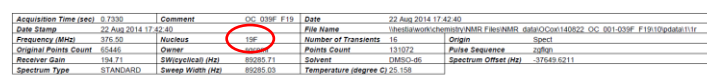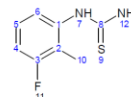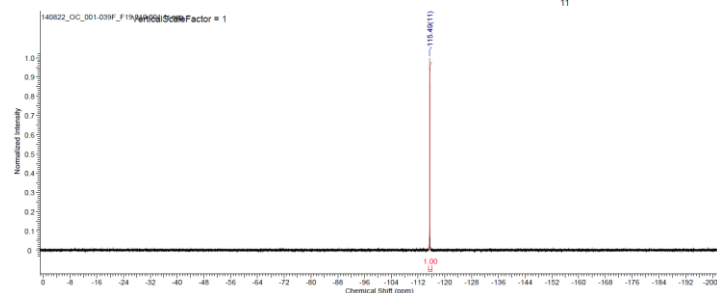

# Compound s13

(1) ELSD Signal Smooth (SG, 1x1)

61.003  
Range: 60.942

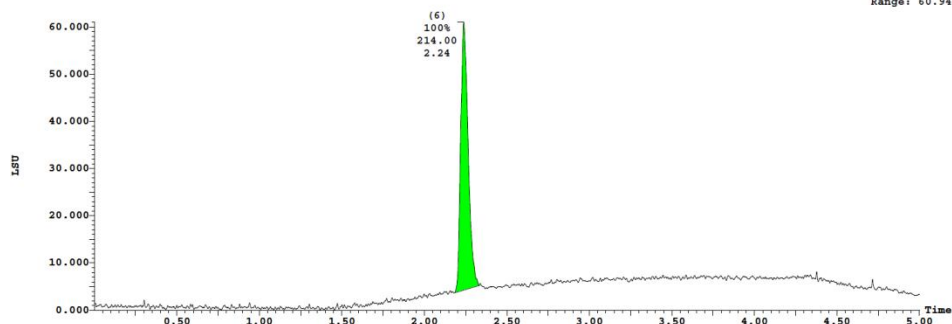

| Acquisition Time (sec) | Comment          | OC                     | OS                   | A                    | H1                                                                              | Date                 |
|------------------------|------------------|------------------------|----------------------|----------------------|---------------------------------------------------------------------------------|----------------------|
| 12 Dec 2014 15:36:16   |                  |                        |                      |                      |                                                                                 | 12 Dec 2014 15:36:16 |
| Date Stamp             | Frequency (MHz)  | Nucleus                | Number of Transients | Origin               | File Name                                                                       |                      |
| 32768                  | 400.13           | <sup>1</sup> H         | 16                   | Spect1               | libshahavitchemistry\NMR Files\NMR_data\OCCon141212_OC_001-053A\11-H1\data1111r |                      |
| Original Points Count  | Receiver Gain    | SW (Hz)                | Points Count         | Pulse Sequence       |                                                                                 |                      |
| 32768                  | 134.71           | 8012.82                | 55536                | zgpg30               |                                                                                 |                      |
| Spectrum Type          | Sweep Width (Hz) | Temperature (degree C) | Solvent              | Spectrum Offset (Hz) |                                                                                 |                      |
| STANDARD               | 8012.70          | 25.159                 | DMSO-d6              | 2470.9668            |                                                                                 |                      |

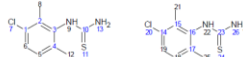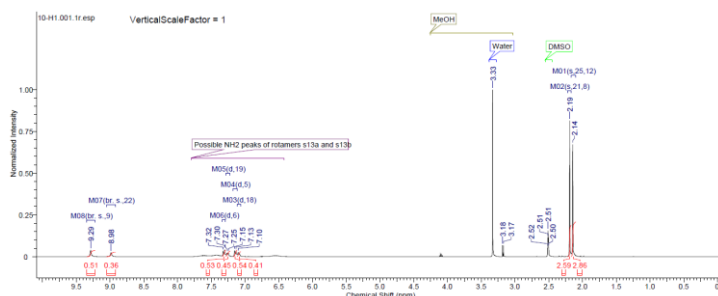

| Acquisition Time (sec) | Comment          | OC                     | OS                   | A                    | H1                                                                              | Date                 |
|------------------------|------------------|------------------------|----------------------|----------------------|---------------------------------------------------------------------------------|----------------------|
| 13 Dec 2014 05:09:04   |                  |                        |                      |                      |                                                                                 | 13 Dec 2014 05:09:04 |
| Date Stamp             | Frequency (MHz)  | Nucleus                | Number of Transients | Origin               | File Name                                                                       |                      |
| 32768                  | 400.13           | <sup>1</sup> H         | 16                   | Spect1               | libshahavitchemistry\NMR Files\NMR_data\OCCon141212_OC_001-053A\11-H1\data1111r |                      |
| Original Points Count  | Receiver Gain    | SW (Hz)                | Points Count         | Pulse Sequence       |                                                                                 |                      |
| 32768                  | 134.71           | 8012.82                | 55536                | zgpg30               |                                                                                 |                      |
| Spectrum Type          | Sweep Width (Hz) | Temperature (degree C) | Solvent              | Spectrum Offset (Hz) |                                                                                 |                      |
| STANDARD               | 8012.70          | 25.159                 | DMSO-d6              | 2470.9668            |                                                                                 |                      |

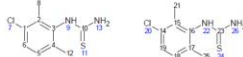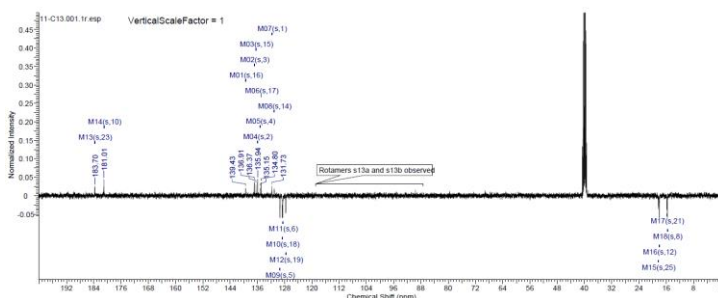

| Acquisition Time (sec) | Comment          | OC                     | OS                   | A                    | H1                                                                                  | Date                 |
|------------------------|------------------|------------------------|----------------------|----------------------|-------------------------------------------------------------------------------------|----------------------|
| 16 Dec 2014 11:50:24   |                  |                        |                      |                      |                                                                                     | 16 Dec 2014 11:50:24 |
| Date Stamp             | Frequency (MHz)  | Nucleus                | Number of Transients | Origin               | File Name                                                                           |                      |
| 131072                 | 400.13           | <sup>1</sup> H         | 8                    | Spect1               | libshahavitchemistry\NMR Files\NMR_data\OCCon141212_OC_001-053A\15-H1-70C\data1111r |                      |
| Original Points Count  | Receiver Gain    | SW (Hz)                | Points Count         | Pulse Sequence       |                                                                                     |                      |
| 131072                 | 141.83           | 8264.46                | 131072               | zgpg30               |                                                                                     |                      |
| Spectrum Type          | Sweep Width (Hz) | Temperature (degree C) | Solvent              | Spectrum Offset (Hz) |                                                                                     |                      |
| STANDARD               | 8264.46          | 61.79, 142             | DMSO-d6              | 2470.9700            |                                                                                     |                      |

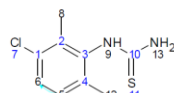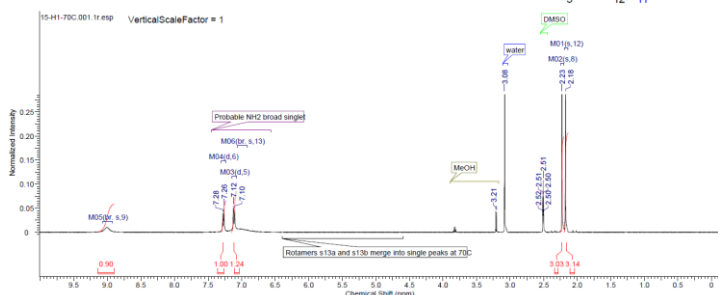

# Compound s14

UV Detector: 254 Smooth (SG, 1x1)

3.678e-2  
Range: 3.677e-2

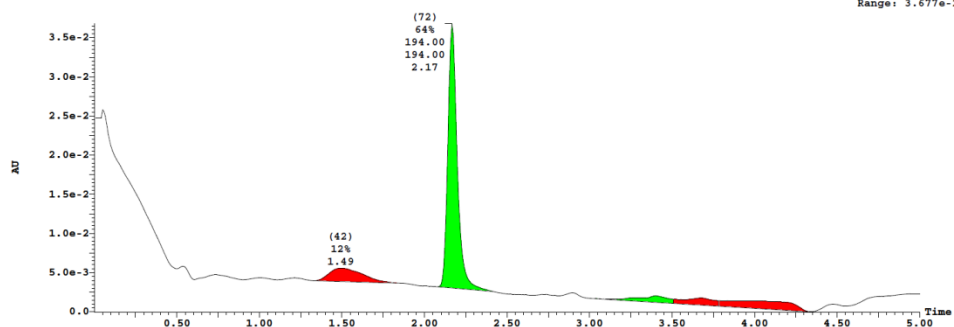

|                        |                      |                  |                                                                   |                        |                      |
|------------------------|----------------------|------------------|-------------------------------------------------------------------|------------------------|----------------------|
| Acquisition Time (sec) | 4.0894               | Comment          | OC_050_B_H1                                                       | Date                   | 27 Nov 2014 12:05:20 |
| Date Stamp             | 27 Nov 2014 12:05:20 | File Name        | \\hstia\work\chemistry\NMR Files\NMR_data\OC050B\10-H1\data\11-1r |                        |                      |
| Frequency (MHz)        | 400.13               | Nucleus          | <sup>1</sup> H                                                    | Number of Transients   | 16                   |
| Original Points Count  | 32768                | Owner            | sqcmmr                                                            | Points Count           | 55536                |
| Receiver Gain          | 194.71               | SW (cycles) (Hz) | 8012.82                                                           | Pulse Sequence         | zg30                 |
| Spectrum Offset (Hz)   | 2435.3630            | Spectrum Type    | STANDARD                                                          | Solvent                | CHLOROFORM-d         |
|                        |                      | Sweep Width (Hz) | 8012.70                                                           | Temperature (degree C) | 25.154               |

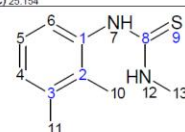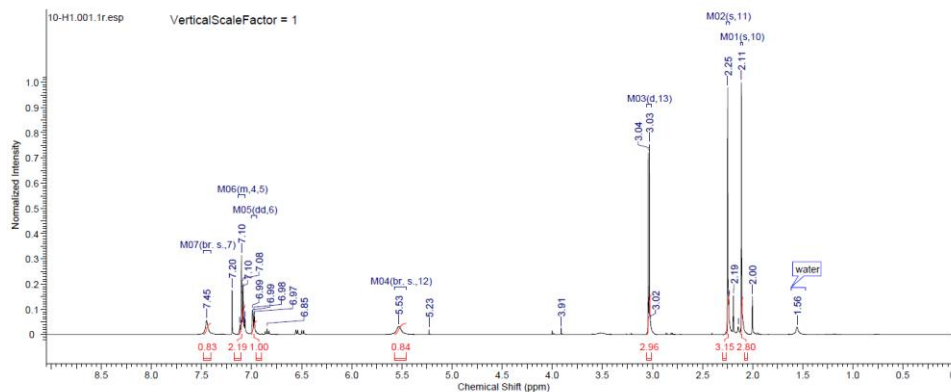

|                        |                      |                  |                                                                    |                        |                      |
|------------------------|----------------------|------------------|--------------------------------------------------------------------|------------------------|----------------------|
| Acquisition Time (sec) | 1.3631               | Comment          | OC_050_B_C13                                                       | Date                   | 28 Nov 2014 04:16:00 |
| Date Stamp             | 28 Nov 2014 04:16:00 | File Name        | \\hstia\work\chemistry\NMR Files\NMR_data\OC050B\11-C13\data\11-1r |                        |                      |
| Frequency (MHz)        | 100.61               | Nucleus          | <sup>13</sup> C                                                    | Number of Transients   | 1024                 |
| Original Points Count  | 32768                | Owner            | sqcmmr                                                             | Points Count           | 32768                |
| Receiver Gain          | 194.71               | SW (cycles) (Hz) | 24038.46                                                           | Pulse Sequence         | jmod                 |
| Spectrum Offset (Hz)   | 10060.3320           | Spectrum Type    | APT                                                                | Solvent                | CHLOROFORM-d         |
|                        |                      | Sweep Width (Hz) | 24037.73                                                           | Temperature (degree C) | 25.243               |

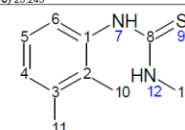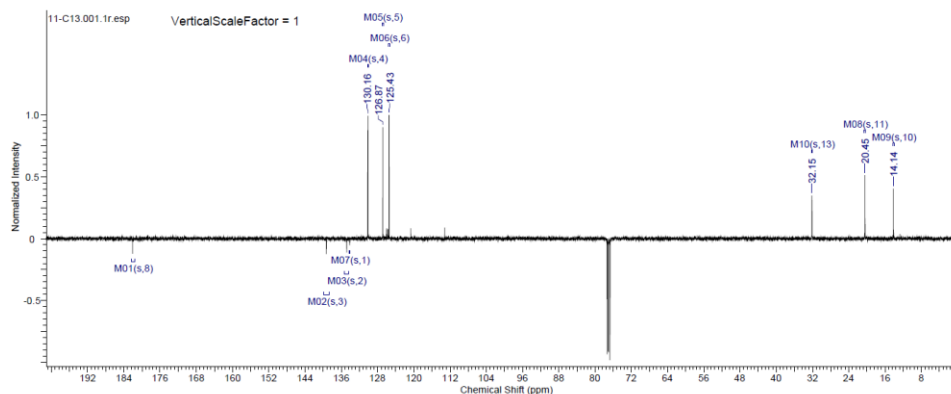

# Compound s15

(1) ELSD Signal Smooth (SG, 1x1)

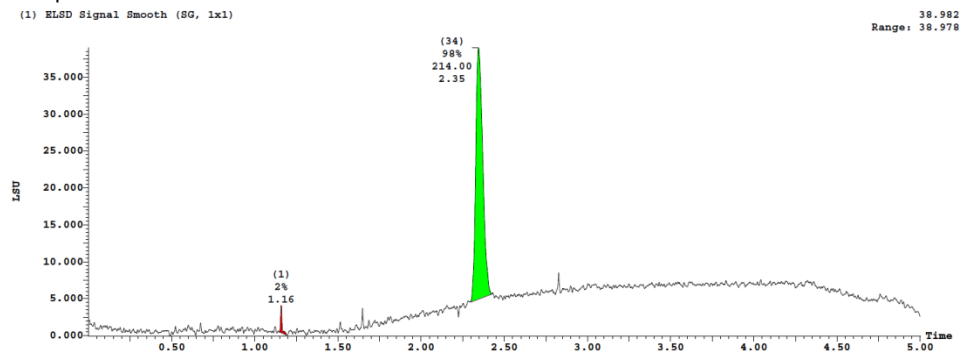

|                        |                      |                   |                                                                                 |                        |                      |
|------------------------|----------------------|-------------------|---------------------------------------------------------------------------------|------------------------|----------------------|
| Acquisition Time (sec) | 4.0894               | Comment           | OC_050_A_H1                                                                     | Date                   | 27 Nov 2014 11:58:56 |
| Date Stamp             | 27 Nov 2014 11:58:56 | File Name         | \hstai\work\chemistry\NMR Files\NMR_data\OCox\141127_OC_001-050A\10-H1\data\11r |                        |                      |
| Frequency (MHz)        | 400.13               | Nucleus           | <sup>1</sup> H                                                                  | Number of Transients   | 16                   |
| Original Points Count  | 32768                | Owner             | sqcnmr                                                                          | Points Count           | 65536                |
| Receiver Gain          | 194.71               | SW(cyclical) (Hz) | 8012.82                                                                         | Solvent                | CHLOROFORM-d         |
| Spectrum Offset (Hz)   | 2470.9668            | Spectrum Type     | STANDARD                                                                        | Sweep Width (Hz)       | 8012.70              |
|                        |                      |                   |                                                                                 | Temperature (degree C) | 25.155               |

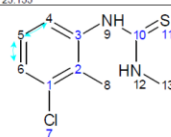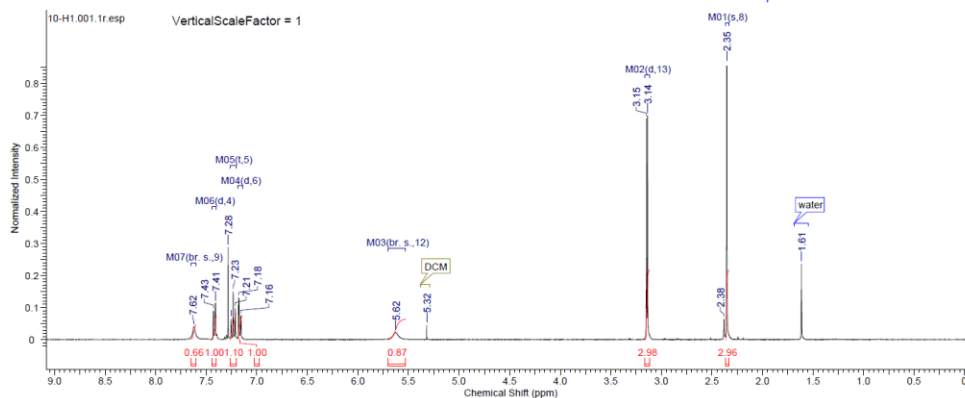

|                        |                      |                   |                                                                                  |                        |                      |
|------------------------|----------------------|-------------------|----------------------------------------------------------------------------------|------------------------|----------------------|
| Acquisition Time (sec) | 1.3631               | Comment           | OC_050_A_C13                                                                     | Date                   | 28 Nov 2014 02:12:16 |
| Date Stamp             | 28 Nov 2014 02:12:16 | File Name         | \hstai\work\chemistry\NMR Files\NMR_data\OCox\141127_OC_001-050A\11-C13\data\11r |                        |                      |
| Frequency (MHz)        | 100.61               | Nucleus           | <sup>13</sup> C                                                                  | Number of Transients   | 1024                 |
| Original Points Count  | 32768                | Owner             | sqcnmr                                                                           | Points Count           | 32768                |
| Receiver Gain          | 194.71               | SW(cyclical) (Hz) | 24036.46                                                                         | Solvent                | CHLOROFORM-d         |
| Spectrum Offset (Hz)   | 10060.3320           | Spectrum Type     | APT                                                                              | Sweep Width (Hz)       | 24037.73             |
|                        |                      |                   |                                                                                  | Temperature (degree C) | 25.188               |

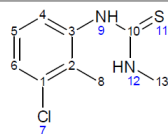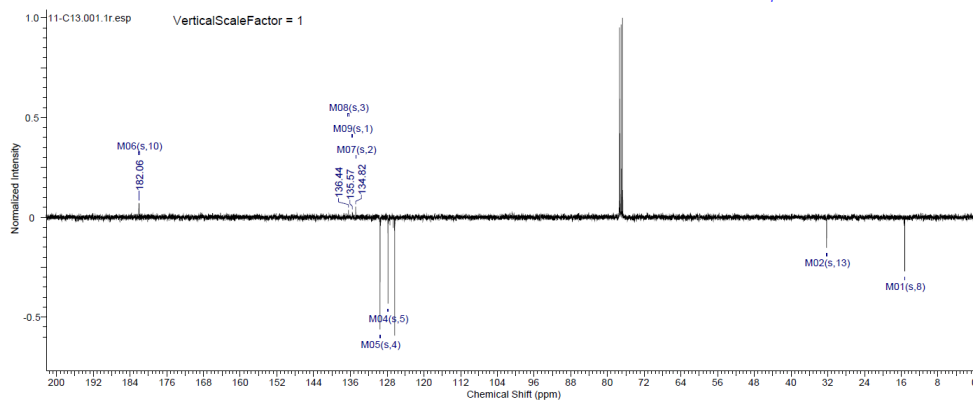

# Compound s16

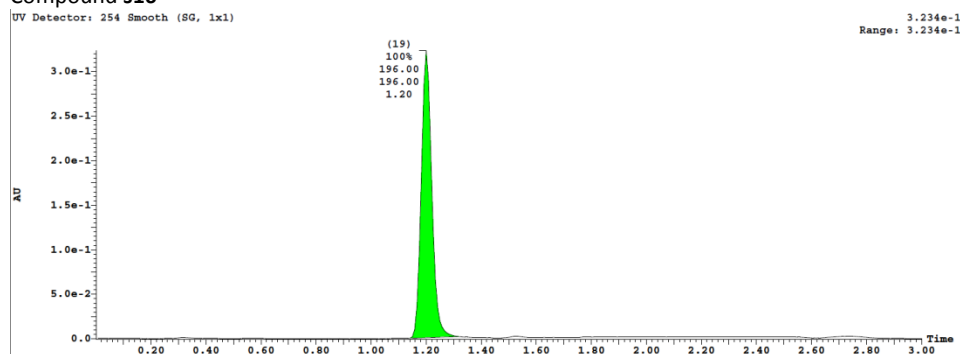

|                        |                      |                   |                                                                                    |                        |                      |
|------------------------|----------------------|-------------------|------------------------------------------------------------------------------------|------------------------|----------------------|
| Acquisition Time (sec) | 4.0894               | Comment           | OC_050_G                                                                           | Date                   | 05 Dec 2014 12:37:20 |
| Date Stamp             | 05 Dec 2014 12:37:20 | File Name         | \vestia\work\chemistry\NMR Files\NMR_data\OCox\141205_OC_001-050G\10-H1\pdata\1\1r |                        |                      |
| Frequency (MHz)        | 400.13               | Nucleus           | <sup>1</sup> H                                                                     | Number of Transients   | 16                   |
| Original Points Count  | 32768                | Owner             | sgcnmr                                                                             | Points Count           | 65536                |
| Receiver Gain          | 194.71               | SW(cyclical) (Hz) | 8012.82                                                                            | Solvent                | CHLOROFORM-d         |
| Spectrum Offset (Hz)   | 2470.9668            | Spectrum Type     | STANDARD                                                                           | Sweep Width (Hz)       | 8012.70              |
|                        |                      |                   |                                                                                    | Temperature (degree C) | 25.161               |

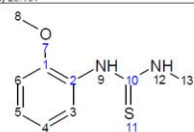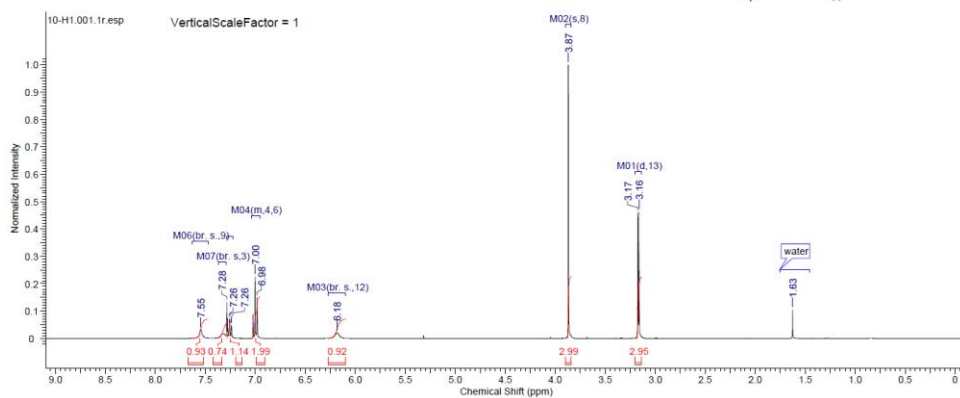

|                        |                      |                   |                                                                                     |                        |                      |
|------------------------|----------------------|-------------------|-------------------------------------------------------------------------------------|------------------------|----------------------|
| Acquisition Time (sec) | 1.3631               | Comment           | OC_050_G_4hC13                                                                      | Date                   | 06 Dec 2014 17:44:32 |
| Date Stamp             | 06 Dec 2014 17:44:32 | File Name         | \vestia\work\chemistry\NMR Files\NMR_data\OCox\141205_OC_001-050G\15-C13\pdata\1\1r |                        |                      |
| Frequency (MHz)        | 100.61               | Nucleus           | <sup>13</sup> C                                                                     | Number of Transients   | 4096                 |
| Original Points Count  | 32768                | Owner             | sgcnmr                                                                              | Points Count           | 32768                |
| Receiver Gain          | 194.71               | SW(cyclical) (Hz) | 24038.46                                                                            | Solvent                | CHLOROFORM-d         |
| Spectrum Offset (Hz)   | 10059.8594           | Spectrum Type     | STANDARD                                                                            | Sweep Width (Hz)       | 24037.73             |
|                        |                      |                   |                                                                                     | Temperature (degree C) | 25.160               |

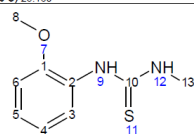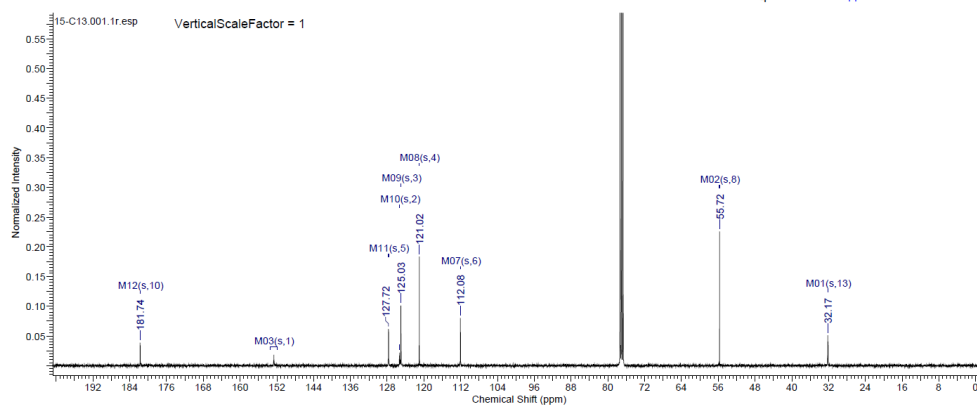

# Compound s18

(1) ELSD Signal Smooth (SG, 1x1)

122.954  
Range: 122.608

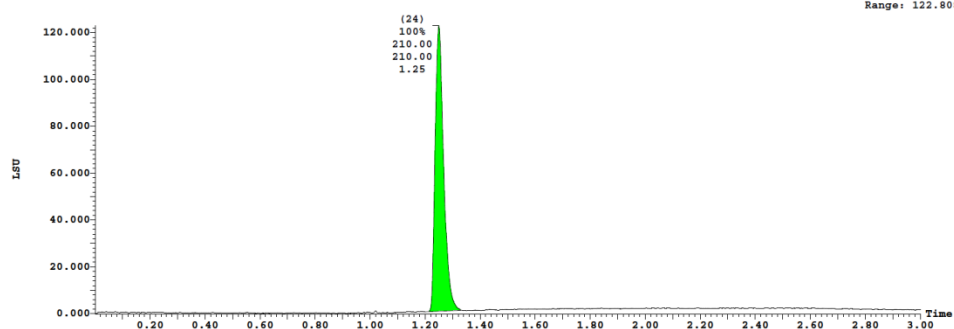

|                        |                      |                   |                                                                           |                        |                      |
|------------------------|----------------------|-------------------|---------------------------------------------------------------------------|------------------------|----------------------|
| Acquisition Time (sec) | 4.0894               | Comment           | OC 050 E                                                                  | Date                   | 02 Dec 2014 11:03:28 |
| Date Stamp             | 02 Dec 2014 11:03:28 | File Name         | \\hesl\work\chemistry\NMR Files\NMR_data\OC\141202_OC_001-050E\10-H1\111r |                        |                      |
| Frequency (MHz)        | 400.13               | Nucleus           | <sup>1</sup> H                                                            | Number of Transients   | 16                   |
| Original Points Count  | 32768                | Owner             | sgcmr                                                                     | Points Count           | 65536                |
| Receiver Gain          | 174.26               | SW(cyclical) (Hz) | 8012.82                                                                   | Solvent                | CHLOROFORM-d         |
| Spectrum Offset (Hz)   | 2436.8794            | Spectrum Type     | STANDARD                                                                  | Sweep Width (Hz)       | 8012.70              |
|                        |                      |                   |                                                                           | Temperature (degree C) | 25.155               |

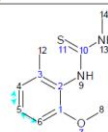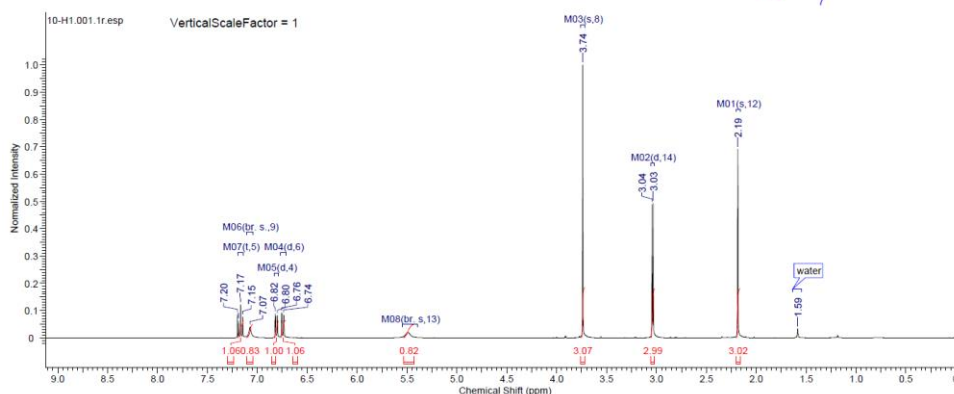

|                        |                      |                   |                                                                                 |                        |                      |
|------------------------|----------------------|-------------------|---------------------------------------------------------------------------------|------------------------|----------------------|
| Acquisition Time (sec) | 1.3631               | Comment           | OC 050 E C13                                                                    | Date                   | 03 Dec 2014 04:35:12 |
| Date Stamp             | 03 Dec 2014 04:35:12 | File Name         | \\hesl\work\chemistry\NMR Files\NMR_data\OC\141202_OC_001-050E\20-C13\data\111r |                        |                      |
| Frequency (MHz)        | 100.61               | Nucleus           | <sup>13</sup> C                                                                 | Number of Transients   | 1024                 |
| Original Points Count  | 32768                | Owner             | sgcmr                                                                           | Points Count           | 32768                |
| Receiver Gain          | 194.71               | SW(cyclical) (Hz) | 24038.46                                                                        | Solvent                | CHLOROFORM-d         |
| Spectrum Offset (Hz)   | 10060.3320           | Spectrum Type     | APT                                                                             | Sweep Width (Hz)       | 24037.73             |
|                        |                      |                   |                                                                                 | Temperature (degree C) | 25.161               |

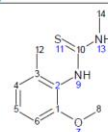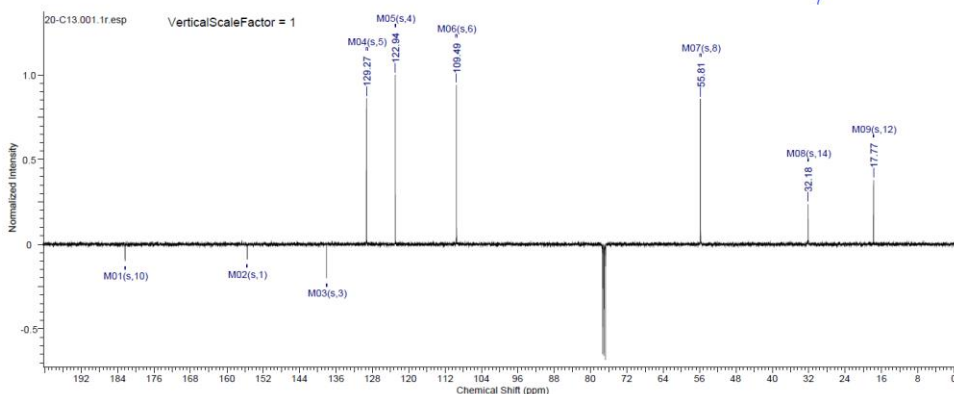

# Compound s19

UV Detector: 254 Smooth (SG, 1x1)

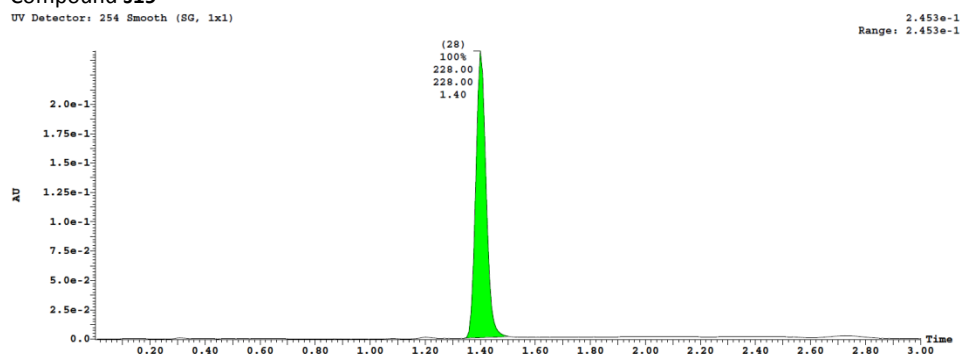

|                        |                      |                   |                |                        |                                                                 |
|------------------------|----------------------|-------------------|----------------|------------------------|-----------------------------------------------------------------|
| Acquisition Time (sec) | 4.0894               | Comment           | OC_050_C       | Date                   | 02 Dec 2014 14:34:40                                            |
| Date Stamp             | 02 Dec 2014 14:34:40 |                   |                | File Name              | \\hestia\work\chemistry\NMR Files\NMR_data\OC050C10-H1\data\11r |
| Frequency (MHz)        | 400.13               | Nucleus           | <sup>1</sup> H | Number of Transients   | 16                                                              |
| Original Points Count  | 32768                | Owner             | sgcnmr         | Points Count           | 65536                                                           |
| Receiver Gain          | 194.71               | SW(cyclical) (Hz) | 8012.82        | Solvent                | CHLOROFORM-d                                                    |
| Spectrum Offset (Hz)   | 2470.9668            | Spectrum Type     | STANDARD       | Sweep Width (Hz)       | 8012.70                                                         |
|                        |                      |                   |                | Temperature (degree C) | 25.157                                                          |

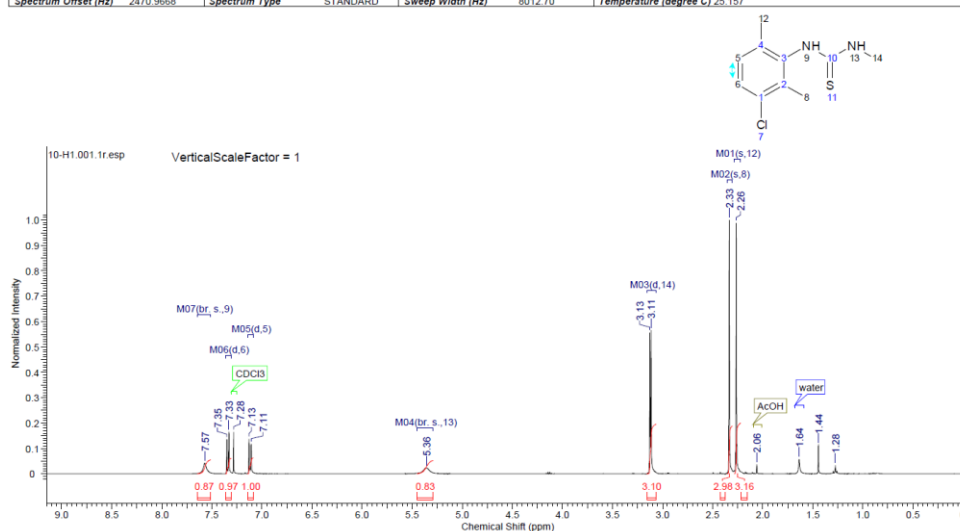

|                        |                      |                   |                 |                        |                                                                  |
|------------------------|----------------------|-------------------|-----------------|------------------------|------------------------------------------------------------------|
| Acquisition Time (sec) | 1.3631               | Comment           | OC_050_C_C13    | Date                   | 04 Dec 2014 05:54:08                                             |
| Date Stamp             | 04 Dec 2014 05:54:08 |                   |                 | File Name              | \\hestia\work\chemistry\NMR Files\NMR_data\OC050C11-C13\data\11r |
| Frequency (MHz)        | 100.61               | Nucleus           | <sup>13</sup> C | Number of Transients   | 1024                                                             |
| Original Points Count  | 32768                | Owner             | sgcnmr          | Points Count           | 32768                                                            |
| Receiver Gain          | 194.71               | SW(cyclical) (Hz) | 24038.46        | Solvent                | CHLOROFORM-d                                                     |
| Spectrum Offset (Hz)   | 10060.3320           | Spectrum Type     | APT             | Sweep Width (Hz)       | 24037.73                                                         |
|                        |                      |                   |                 | Temperature (degree C) | 25.161                                                           |

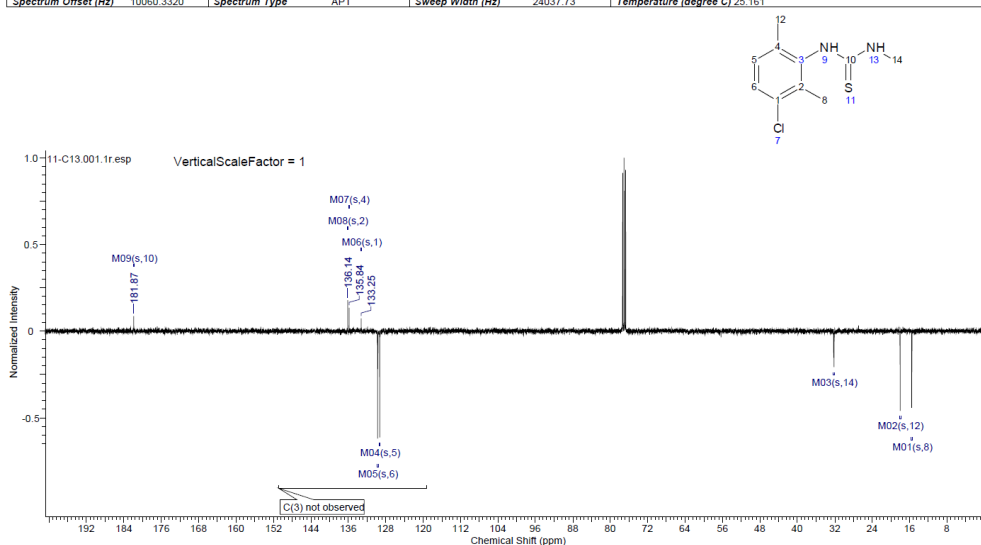

# Compound s22

(1) ELSD Signal Smooth (80, 1x1)

564.243  
Range: 564.221

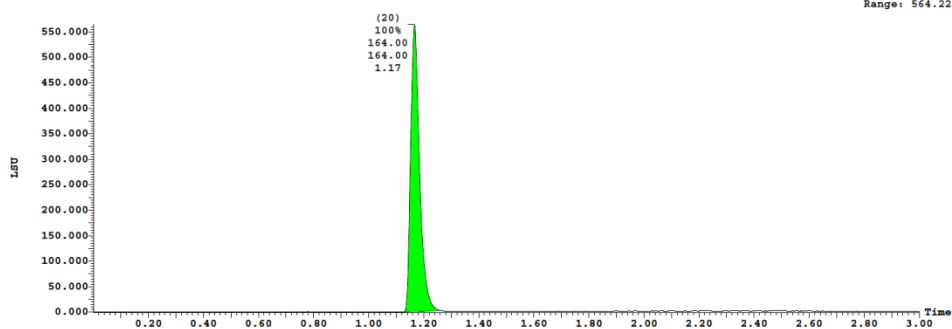

|                        |                      |                   |             |                        |                                                                  |
|------------------------|----------------------|-------------------|-------------|------------------------|------------------------------------------------------------------|
| Acquisition Time (sec) | 4.0894               | Comment           | OC_051_B_H1 | Date                   | 26 Nov 2014 17:44:32                                             |
| Date Stamp             | 26 Nov 2014 17:44:32 | Nucleus           | 1H          | File Name              | \\hestia\work\chemistry\NMR Files\NMR_data\OC051B\10-H1\data\11r |
| Frequency (MHz)        | 400.13               | Owner             | sgcnmr      | Number of Transients   | 16                                                               |
| Original Points Count  | 32768                | SW(cyclical) (Hz) | 8012.82     | Points Count           | 65536                                                            |
| Receiver Gain          | 155.34               | Sweep Width (Hz)  | 8012.70     | Pulse Sequence         | zg30                                                             |
| Spectrum Type          | STANDARD             |                   |             | Solvent                | DMSO-d6                                                          |
|                        |                      |                   |             | Spectrum Offset (Hz)   | 2470.9668                                                        |
|                        |                      |                   |             | Temperature (degree C) | 25.159                                                           |

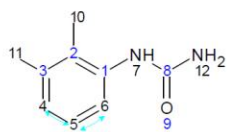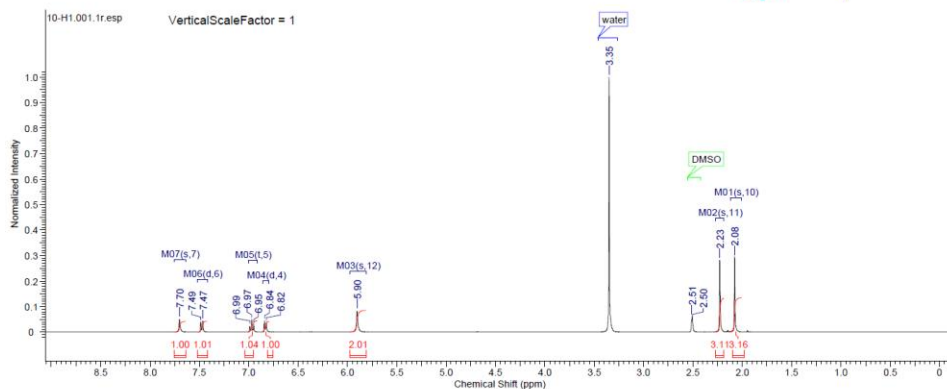

|                        |                      |                   |              |                        |                                                                   |
|------------------------|----------------------|-------------------|--------------|------------------------|-------------------------------------------------------------------|
| Acquisition Time (sec) | 1.3631               | Comment           | OC_051_B_C13 | Date                   | 26 Nov 2014 21:02:56                                              |
| Date Stamp             | 26 Nov 2014 21:02:56 | Nucleus           | 13C          | File Name              | \\hestia\work\chemistry\NMR Files\NMR_data\OC051B\11-C13\data\11r |
| Frequency (MHz)        | 100.61               | Owner             | sgcnmr       | Number of Transients   | 1024                                                              |
| Original Points Count  | 32768                | SW(cyclical) (Hz) | 24038.46     | Points Count           | 32768                                                             |
| Receiver Gain          | 194.71               | Sweep Width (Hz)  | 24037.73     | Pulse Sequence         | jmod                                                              |
| Spectrum Type          | APT                  |                   |              | Solvent                | DMSO-d6                                                           |
|                        |                      |                   |              | Spectrum Offset (Hz)   | 10060.3320                                                        |
|                        |                      |                   |              | Temperature (degree C) | 25.161                                                            |

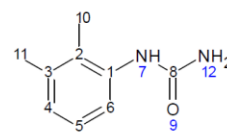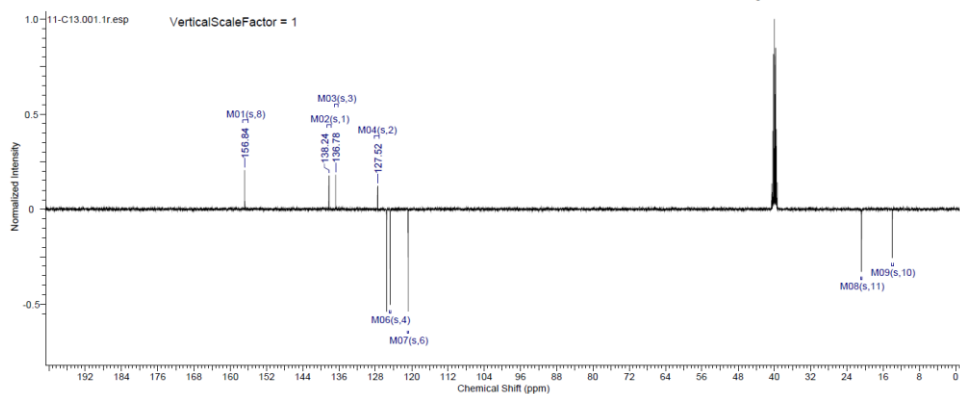



# Compound s23

(1) ELSD Signal Smooth (SG, 1x1)

154.637  
Range: 154.564

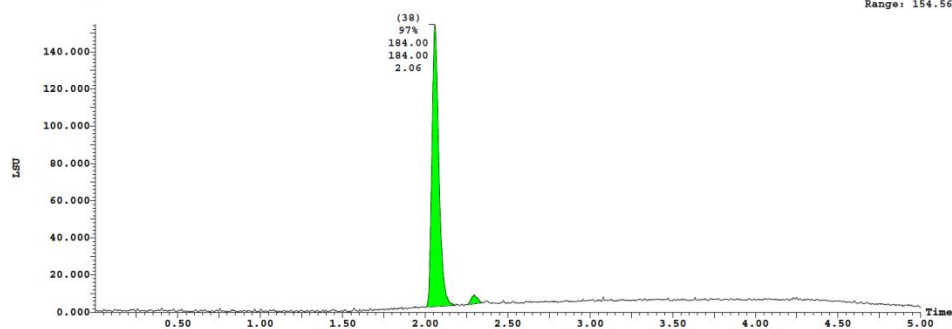

|                        |                      |                   |                                                                                   |                        |                      |
|------------------------|----------------------|-------------------|-----------------------------------------------------------------------------------|------------------------|----------------------|
| Acquisition Time (sec) | 4.0894               | Comment           | OC_051_A                                                                          | Date                   | 02 Dec 2014 13:41:20 |
| Date Stamp             | 02 Dec 2014 13:41:20 | File Name         | \hvest\work\chemistry\NMR Files\NMR_data\OCox\141202_OC_001-051A\10-H1\pdata\111r |                        |                      |
| Frequency (MHz)        | 400.13               | Nucleus           | <sup>1</sup> H                                                                    | Number of Transients   | 16                   |
| Original Points Count  | 32768                | Owner             | sgcnmr                                                                            | Points Count           | 65536                |
| Receiver Gain          | 194.71               | SW(cyclical) (Hz) | 8012.82                                                                           | Solvent                | DMSO-d6              |
| Spectrum Type          | STANDARD             | Sweep Width (Hz)  | 8012.70                                                                           | Temperature (degree C) | 25.158               |
|                        |                      |                   |                                                                                   | Pulse Sequence         | zg30                 |
|                        |                      |                   |                                                                                   | Spectrum Offset (Hz)   | 2470.9668            |

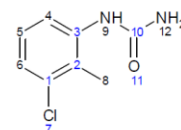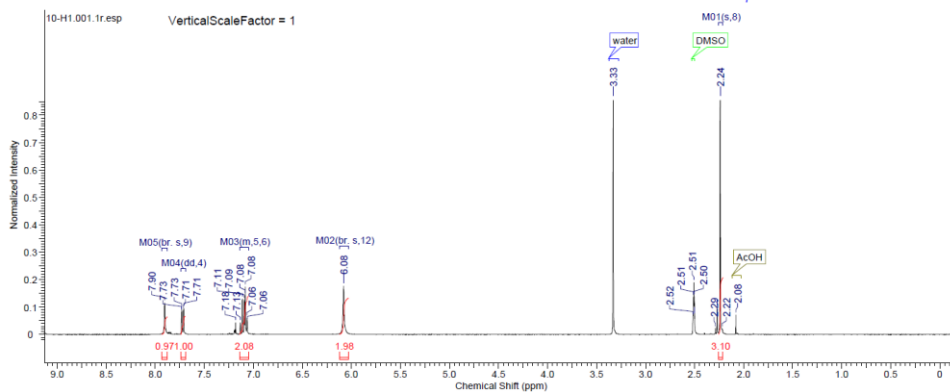

|                        |                      |                   |                                                                                    |                        |                      |
|------------------------|----------------------|-------------------|------------------------------------------------------------------------------------|------------------------|----------------------|
| Acquisition Time (sec) | 1.3631               | Comment           | OC_051_A_C13                                                                       | Date                   | 03 Dec 2014 23:49:20 |
| Date Stamp             | 03 Dec 2014 23:49:20 | File Name         | \hvest\work\chemistry\NMR Files\NMR_data\OCox\141202_OC_001-051A\11-C13\pdata\111r |                        |                      |
| Frequency (MHz)        | 100.61               | Nucleus           | <sup>13</sup> C                                                                    | Number of Transients   | 1024                 |
| Original Points Count  | 32768                | Owner             | sgcnmr                                                                             | Points Count           | 32768                |
| Receiver Gain          | 194.71               | SW(cyclical) (Hz) | 24038.46                                                                           | Solvent                | DMSO-d6              |
| Spectrum Type          | APT                  | Sweep Width (Hz)  | 24037.73                                                                           | Temperature (degree C) | 25.159               |
|                        |                      |                   |                                                                                    | Pulse Sequence         | mod                  |
|                        |                      |                   |                                                                                    | Spectrum Offset (Hz)   | 10060.3320           |

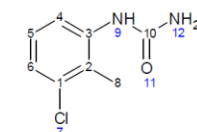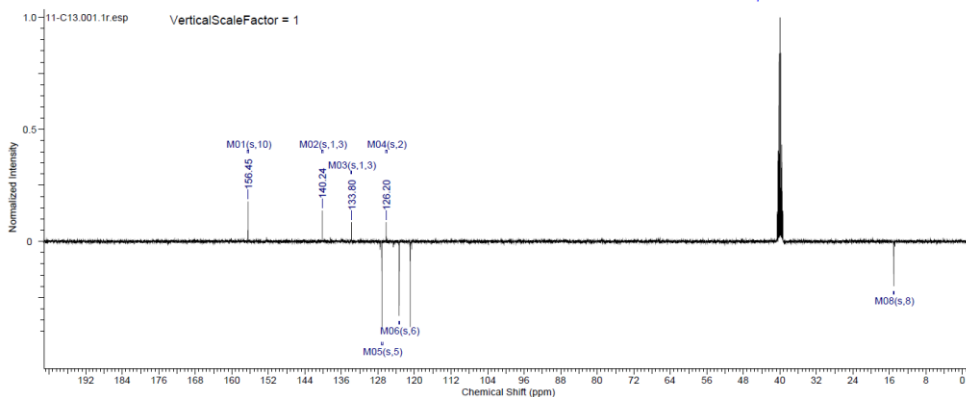

# Compound s24

(1) ELSD Signal Smooth (8G, 1x1)

216.042  
Range: 216.027

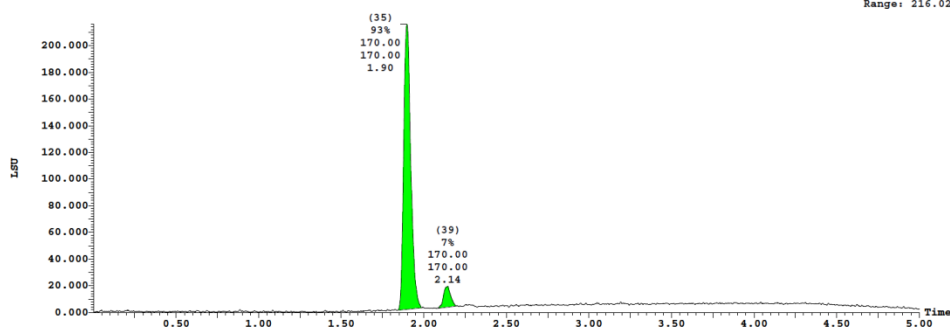

|                        |                      |                        |                                                                                 |                      |                      |
|------------------------|----------------------|------------------------|---------------------------------------------------------------------------------|----------------------|----------------------|
| Acquisition Time (sec) | 4.0894               | Comment                | OC 051 F                                                                        | Date                 | 02 Dec 2014 13:52:00 |
| Date Stamp             | 02 Dec 2014 13:52:00 | File Name              | \\hesl\work\chemistry\NMR Files\NMR_data\OCox\141202_OC_001-051F\10-H1\data\11r |                      |                      |
| Frequency (MHz)        | 400.13               | Nucleus                | <sup>1</sup> H                                                                  | Number of Transients | 16                   |
| Original Points Count  | 32768                | Owner                  | sqnmr                                                                           | Points Count         | 65536                |
| Receiver Gain          | 194.71               | SW (cyclical) (Hz)     | 8012.82                                                                         | Pulse Sequence       | zg30                 |
| Spectrum Type          | STANDARD             | Sweep Width (Hz)       | 8012.70                                                                         | Spectrum Offset (Hz) | 2470.9668            |
|                        |                      | Temperature (degree C) | 25.158                                                                          |                      |                      |

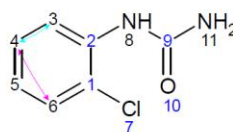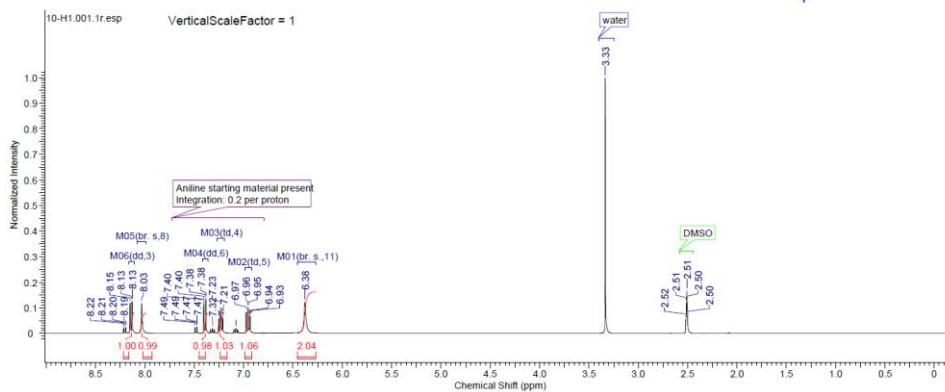

|                        |                      |                        |                                                                                  |                      |                      |
|------------------------|----------------------|------------------------|----------------------------------------------------------------------------------|----------------------|----------------------|
| Acquisition Time (sec) | 1.3631               | Comment                | OC 051 F C13                                                                     | Date                 | 04 Dec 2014 03:50:24 |
| Date Stamp             | 04 Dec 2014 03:50:24 | File Name              | \\hesl\work\chemistry\NMR Files\NMR_data\OCox\141202_OC_001-051F\11-C13\data\11r |                      |                      |
| Frequency (MHz)        | 100.61               | Nucleus                | <sup>13</sup> C                                                                  | Number of Transients | 1024                 |
| Original Points Count  | 32768                | Owner                  | sqnmr                                                                            | Points Count         | 32768                |
| Receiver Gain          | 194.71               | SW (cyclical) (Hz)     | 24038.46                                                                         | Pulse Sequence       | jmod                 |
| Spectrum Type          | APT                  | Sweep Width (Hz)       | 24037.73                                                                         | Spectrum Offset (Hz) | 10060.3320           |
|                        |                      | Temperature (degree C) | 25.162                                                                           |                      |                      |

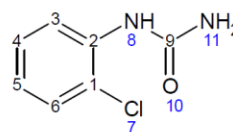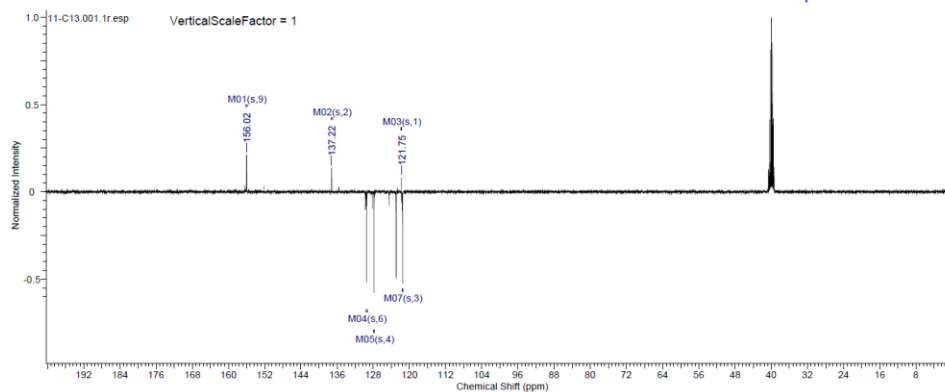

# Compound s25

(1) ELSD Signal Smooth (8G, 1x1)

1210.959  
Range: 1210.899

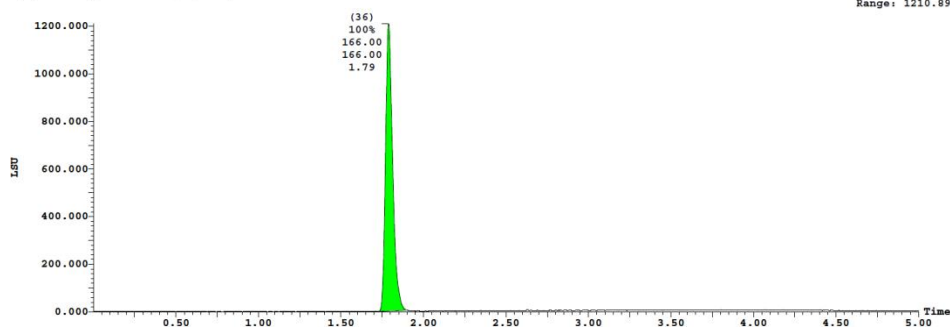

|                        |                      |                        |          |                      |                                                                                 |
|------------------------|----------------------|------------------------|----------|----------------------|---------------------------------------------------------------------------------|
| Acquisition Time (sec) | 4.0894               | Comment                | OC_051_G | Date                 | 01 Dec 2014 14:58:08                                                            |
| Date Stamp             | 01 Dec 2014 14:58:08 | Nucleus                | 1H       | File Name            | \\hestia\work\chemistry\NMR Files\NMR_data\OCox141201_OC_001-051G10-H1\data\11r |
| Frequency (MHz)        | 400.13               | Owner                  | sgcnmr   | Number of Transients | 16                                                                              |
| Original Points Count  | 32768                | SW(cyclical) (Hz)      | 8012.82  | Points Count         | 65536                                                                           |
| Receiver Gain          | 77.20                | Sweep Width (Hz)       | 8012.70  | Pulse Sequence       | zg30                                                                            |
| Spectrum Type          | STANDARD             | Temperature (degree C) | 25.158   | Solvent              | DMSO-d6                                                                         |
|                        |                      |                        |          | Spectrum Offset (Hz) | 2470.9568                                                                       |

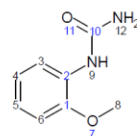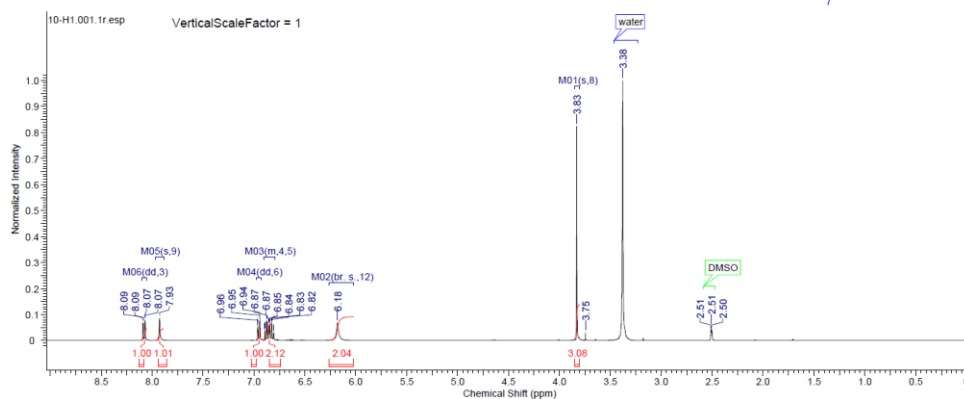

|                        |                      |                        |              |                      |                                                                                  |
|------------------------|----------------------|------------------------|--------------|----------------------|----------------------------------------------------------------------------------|
| Acquisition Time (sec) | 1.3631               | Comment                | OC_051_G_C13 | Date                 | 03 Dec 2014 02:31:28                                                             |
| Date Stamp             | 03 Dec 2014 02:31:28 | Nucleus                | 13C          | File Name            | \\hestia\work\chemistry\NMR Files\NMR_data\OCox141201_OC_001-051G11-C13\data\11r |
| Frequency (MHz)        | 100.61               | Owner                  | sgcnmr       | Number of Transients | 1024                                                                             |
| Original Points Count  | 32768                | SW(cyclical) (Hz)      | 24038.46     | Points Count         | 32768                                                                            |
| Receiver Gain          | 194.71               | Sweep Width (Hz)       | 24037.73     | Pulse Sequence       | jmod                                                                             |
| Spectrum Type          | APT                  | Temperature (degree C) | 25.161       | Solvent              | DMSO-d6                                                                          |
|                        |                      |                        |              | Spectrum Offset (Hz) | 10060.3320                                                                       |

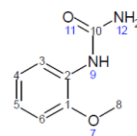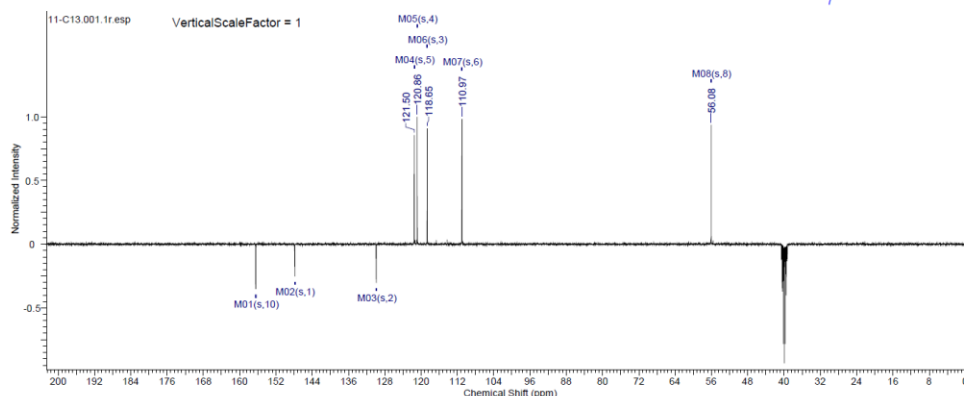

# Compound s27

(1) ELSD Signal Smooth (8G, 1x1)

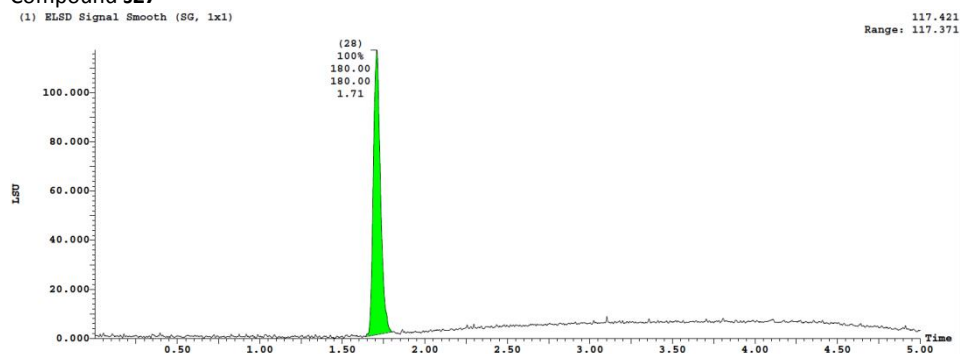

|                        |                      |                    |                |                        |                                                                                     |
|------------------------|----------------------|--------------------|----------------|------------------------|-------------------------------------------------------------------------------------|
| Acquisition Time (sec) | 4.0894               | Comment            | OC_051_E       | Date                   | 02 Dec 2014 13:45:36                                                                |
| Date Stamp             | 02 Dec 2014 13:45:36 |                    |                | File Name              | \\hestia\work\chemistry\NMR Files\NMR_data\OCox\141202_OC_001-051E\10-H1\pdata\1\1r |
| Frequency (MHz)        | 400.13               | Nucleus            | <sup>1</sup> H | Number of Transients   | 16                                                                                  |
| Original Points Count  | 32768                | Owner              | sqcmmr         | Points Count           | 65536                                                                               |
| Receiver Gain          | 194.71               | SW (cyclical) (Hz) | 8012.82        | Solvent                | DMSO-d6                                                                             |
| Spectrum Type          | STANDARD             | Sweep Width (Hz)   | 8012.70        | Temperature (degree C) | 25.159                                                                              |
|                        |                      |                    |                | Pulse Sequence         | zg30                                                                                |
|                        |                      |                    |                | Spectrum Offset (Hz)   | 2470.9668                                                                           |

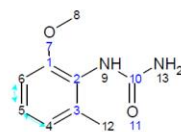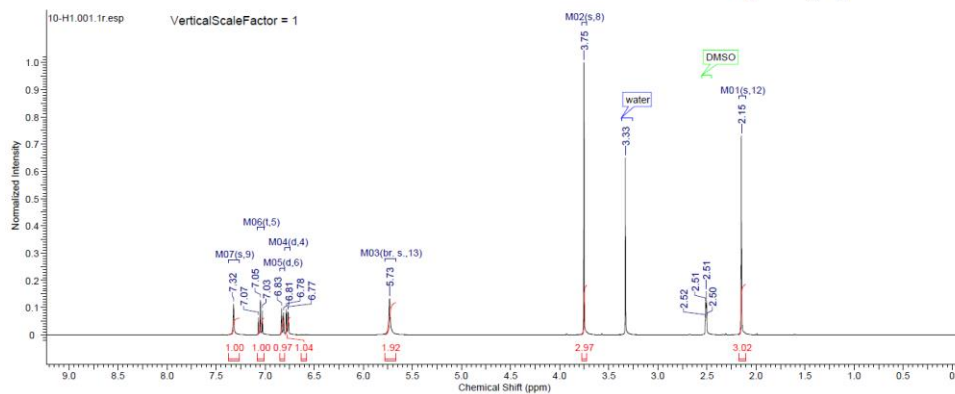

|                        |                      |                    |                 |                        |                                                                                      |
|------------------------|----------------------|--------------------|-----------------|------------------------|--------------------------------------------------------------------------------------|
| Acquisition Time (sec) | 1.3631               | Comment            | OC_051_E_C13    | Date                   | 04 Dec 2014 01:46:40                                                                 |
| Date Stamp             | 04 Dec 2014 01:46:40 |                    |                 | File Name              | \\hestia\work\chemistry\NMR Files\NMR_data\OCox\141202_OC_001-051E\11-C13\pdata\1\1r |
| Frequency (MHz)        | 100.61               | Nucleus            | <sup>13</sup> C | Number of Transients   | 1024                                                                                 |
| Original Points Count  | 32768                | Owner              | sqcmmr          | Points Count           | 32768                                                                                |
| Receiver Gain          | 194.71               | SW (cyclical) (Hz) | 24038.46        | Solvent                | DMSO-d6                                                                              |
| Spectrum Type          | APT                  | Sweep Width (Hz)   | 24037.73        | Temperature (degree C) | 25.159                                                                               |
|                        |                      |                    |                 | Pulse Sequence         | jmod                                                                                 |
|                        |                      |                    |                 | Spectrum Offset (Hz)   | 10060.3320                                                                           |

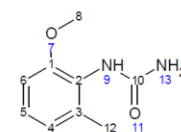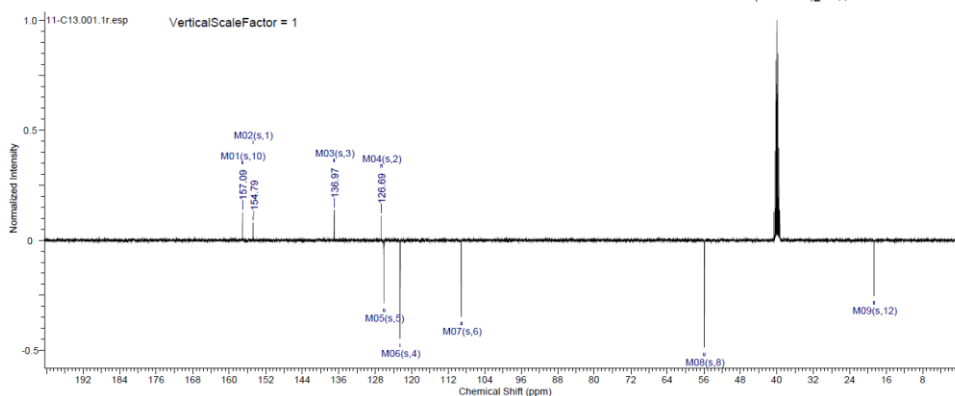

# Compound s29

(1) ELSD Signal Smooth (SG, 1x1)

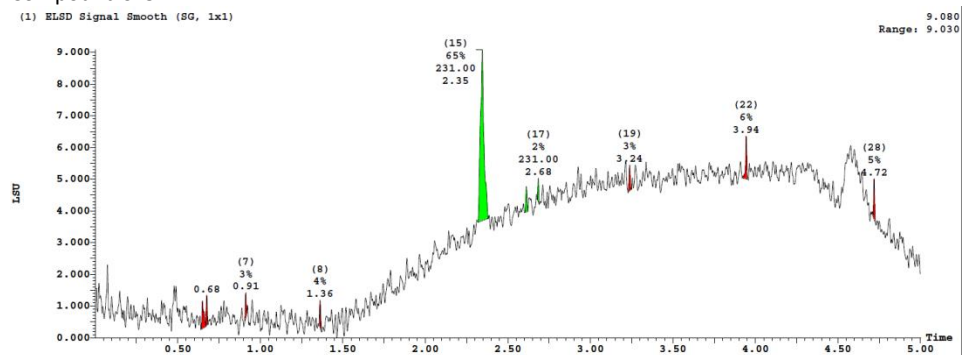

|                        |                      |                   |                                                                 |                        |                      |
|------------------------|----------------------|-------------------|-----------------------------------------------------------------|------------------------|----------------------|
| Acquisition Time (sec) | 4.0894               | Comment           | OC 038 A H1                                                     | Date                   | 31 Jul 2014 07:30:24 |
| Date Stamp             | 31 Jul 2014 07:30:24 | File Name         | \hstest\work\chemistry\NMR Files\NMR_data\OC038A\11-H1\data\11r |                        |                      |
| Frequency (MHz)        | 400.13               | Nucleus           | <sup>1</sup> H                                                  | Number of Transients   | 16                   |
| Original Points Count  | 32768                | Owner             | sgcnmr                                                          | Points Count           | 65536                |
| Receiver Gain          | 194.71               | SW(cyclical) (Hz) | 8012.82                                                         | Pulse Sequence         | zg30                 |
| Spectrum Offset (Hz)   | 2434.6272            | Spectrum Type     | STANDARD                                                        | Solvent                | CHLOROFORM-d         |
|                        |                      | Sweep Width (Hz)  | 8012.70                                                         | Temperature (degree C) | 25.164               |

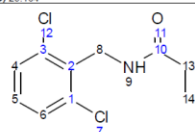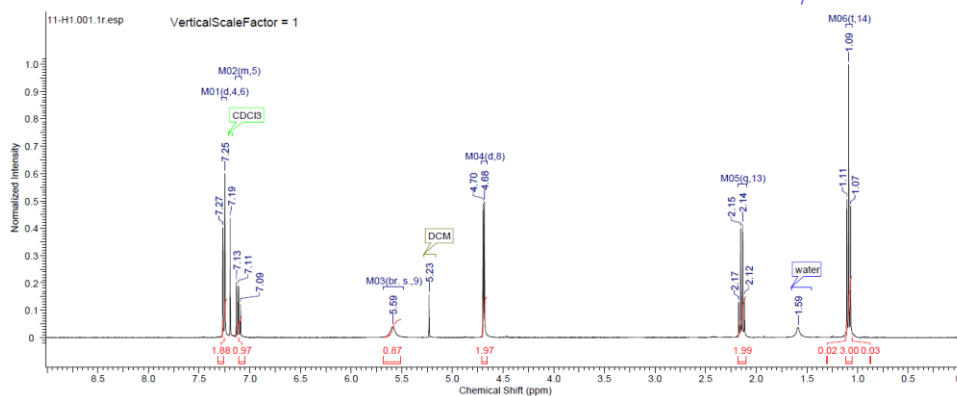

|                        |                      |                   |                                                                  |                        |                      |
|------------------------|----------------------|-------------------|------------------------------------------------------------------|------------------------|----------------------|
| Acquisition Time (sec) | 1.3631               | Comment           | OC 038 A C13                                                     | Date                   | 01 Aug 2014 03:46:24 |
| Date Stamp             | 01 Aug 2014 03:46:24 | File Name         | \hstest\work\chemistry\NMR Files\NMR_data\OC038A\10-C13\data\11r |                        |                      |
| Frequency (MHz)        | 100.61               | Nucleus           | <sup>13</sup> C                                                  | Number of Transients   | 1024                 |
| Original Points Count  | 32768                | Owner             | sgcnmr                                                           | Points Count           | 32768                |
| Receiver Gain          | 194.71               | SW(cyclical) (Hz) | 24038.46                                                         | Pulse Sequence         | jmod                 |
| Spectrum Offset (Hz)   | 10060.3320           | Spectrum Type     | APT                                                              | Solvent                | CHLOROFORM-d         |
|                        |                      | Sweep Width (Hz)  | 24037.73                                                         | Temperature (degree C) | 25.160               |

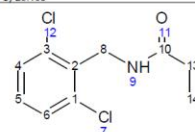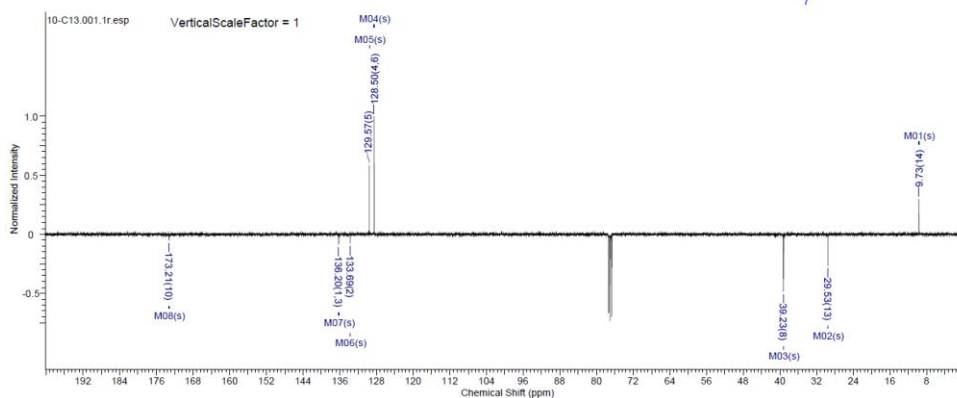

# Compound s30

UV Detector: TIC Smooth (80, 1x1)

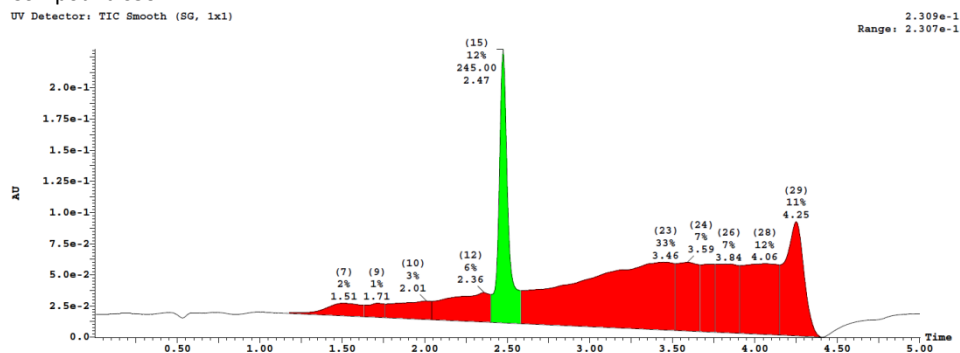

|                        |                      |                   |                                                               |                        |                      |
|------------------------|----------------------|-------------------|---------------------------------------------------------------|------------------------|----------------------|
| Acquisition Time (sec) | 4.0894               | Comment           | OC_038_R_H1                                                   | Date                   | 01 Aug 2014 05:45:52 |
| Date Stamp             | 01 Aug 2014 05:45:52 | File Name         | \\hesl\work\chemistry\NMR Files\NMR_data\OC038\11-H1\data\11r |                        |                      |
| Frequency (MHz)        | 400.13               | Nucleus           | <sup>1</sup> H                                                | Number of Transients   | 16                   |
| Original Points Count  | 32768                | Owner             | sgcnmr                                                        | Points Count           | 65536                |
| Receiver Gain          | 194.71               | SW(cyclical) (Hz) | 8012.82                                                       | Pulse Sequence         | zg30                 |
| Spectrum Offset (Hz)   | 2435.4675            | Spectrum Type     | STANDARD                                                      | Solvent                | CHLOROFORM-d         |
|                        |                      | Sweep Width (Hz)  | 8012.70                                                       | Temperature (degree C) | 25.152               |

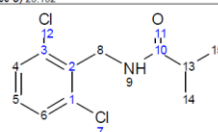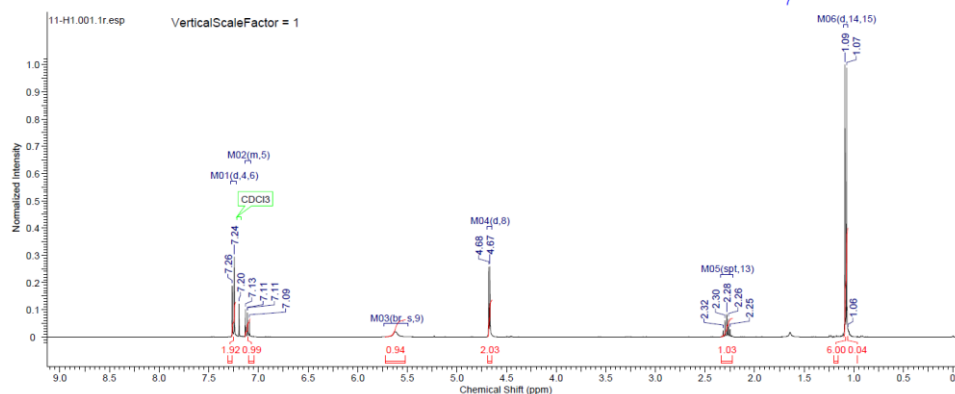

|                        |                      |                   |                                                                |                        |                      |
|------------------------|----------------------|-------------------|----------------------------------------------------------------|------------------------|----------------------|
| Acquisition Time (sec) | 1.3631               | Comment           | OC_038_R_C13                                                   | Date                   | 01 Aug 2014 05:43:44 |
| Date Stamp             | 01 Aug 2014 05:43:44 | File Name         | \\hesl\work\chemistry\NMR Files\NMR_data\OC038\10-C13\data\11r |                        |                      |
| Frequency (MHz)        | 100.61               | Nucleus           | <sup>13</sup> C                                                | Number of Transients   | 1024                 |
| Original Points Count  | 32768                | Owner             | sgcnmr                                                         | Points Count           | 32768                |
| Receiver Gain          | 194.71               | SW(cyclical) (Hz) | 24038.46                                                       | Pulse Sequence         | jmod                 |
| Spectrum Offset (Hz)   | 10060.3320           | Spectrum Type     | APT                                                            | Solvent                | CHLOROFORM-d         |
|                        |                      | Sweep Width (Hz)  | 24037.73                                                       | Temperature (degree C) | 25.159               |

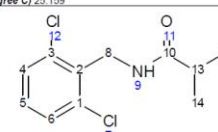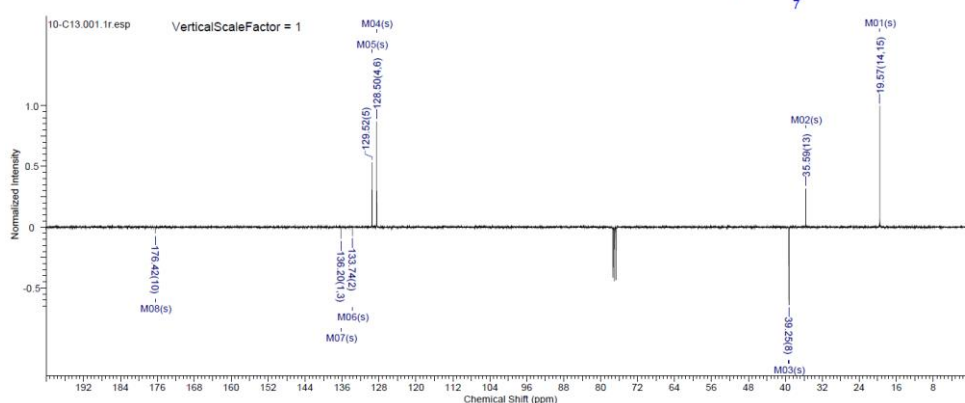

# Compound s31

UV Detector: TIC Smooth (S0, 1x1)

9.417e-1  
Range: 9.417e-1

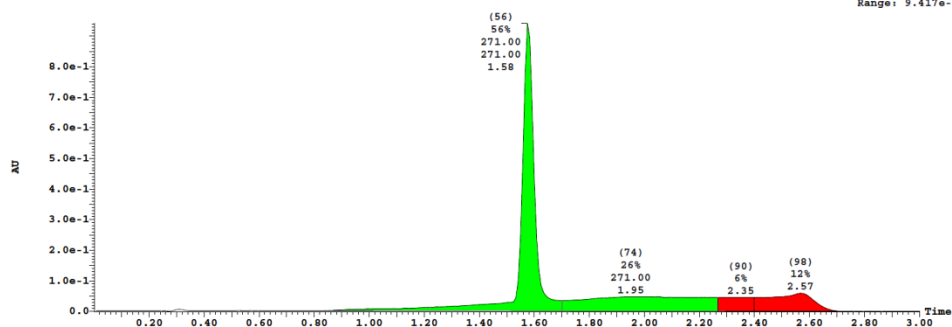

|                        |                      |               |                      |                        |                      |
|------------------------|----------------------|---------------|----------------------|------------------------|----------------------|
| Acquisition Time (sec) | 4.2054               | Comment       | OC_034_H1            | Date                   | 11-Jul-2014 02:36:00 |
| Date Stamp             | 11-Jul-2014 02:36:00 | File Name     | 11-Jul-2014 02:36:00 | Origin                 | Spec1                |
| Frequency (MHz)        | 400.13               | Nucleus       | 1H                   | Number of Transients   | 16                   |
| Original Points Count  | 32768                | Owner         | 98000                | Points Count           | 32768                |
| Receiver Gain          | 134.71               | SWH (Hz)      | 8012.82              | Pulse Sequence         | zgpg30               |
| Spectrum Offset (Hz)   | 2465.1809            | Solvent       | CHLOROFORM-d         | Sweep Width (Hz)       | 8012.79              |
|                        |                      | Spectrum Type | STANDARD             | Temperature (degree C) | 25.160               |

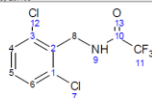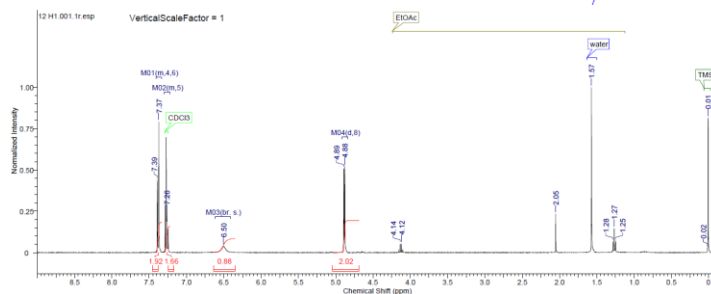

|                        |                      |               |                      |                        |                      |
|------------------------|----------------------|---------------|----------------------|------------------------|----------------------|
| Acquisition Time (sec) | 1.3631               | Comment       | OC_034_C13           | Date                   | 11-Jul-2014 02:12:32 |
| Date Stamp             | 11-Jul-2014 02:12:32 | File Name     | 11-Jul-2014 02:12:32 | Origin                 | Spec1                |
| Frequency (MHz)        | 100.61               | Nucleus       | 13C                  | Number of Transients   | 1024                 |
| Original Points Count  | 32768                | Owner         | 98000                | Points Count           | 32768                |
| Receiver Gain          | 134.71               | SWH (Hz)      | 24938.66             | Pulse Sequence         | zgpg30               |
| Spectrum Offset (Hz)   | 10009.8594           | Solvent       | CHLOROFORM-d         | Sweep Width (Hz)       | 24937.73             |
|                        |                      | Spectrum Type | STANDARD             | Temperature (degree C) | 25.161               |

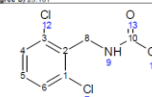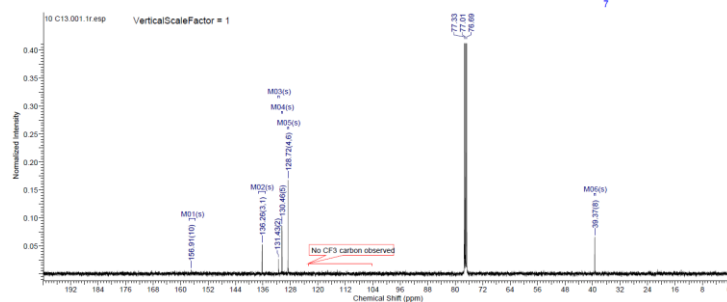

|                        |                      |               |                      |                        |                      |
|------------------------|----------------------|---------------|----------------------|------------------------|----------------------|
| Acquisition Time (sec) | 0.7330               | Comment       | OC_034_F19           | Date                   | 22-Aug-2014 17:32:00 |
| Date Stamp             | 22-Aug-2014 17:32:00 | File Name     | 22-Aug-2014 17:32:00 | Origin                 | Spec1                |
| Frequency (MHz)        | 376.50               | Nucleus       | 19F                  | Number of Transients   | 16                   |
| Original Points Count  | 65488                | Owner         | 98000                | Points Count           | 131072               |
| Receiver Gain          | 134.71               | SWH (Hz)      | 89285.71             | Pulse Sequence         | zgpg30               |
| Spectrum Offset (Hz)   | -37649.8211          | Solvent       | CHLOROFORM-d         | Sweep Width (Hz)       | 89285.03             |
|                        |                      | Spectrum Type | STANDARD             | Temperature (degree C) | 25.160               |

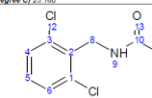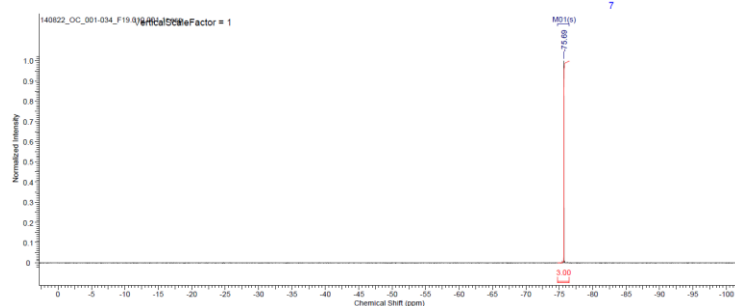

# Compound s32

UV Detector: TIC Smooth (SG, 1x1)

2.088e-1  
Range: 2.087e-1

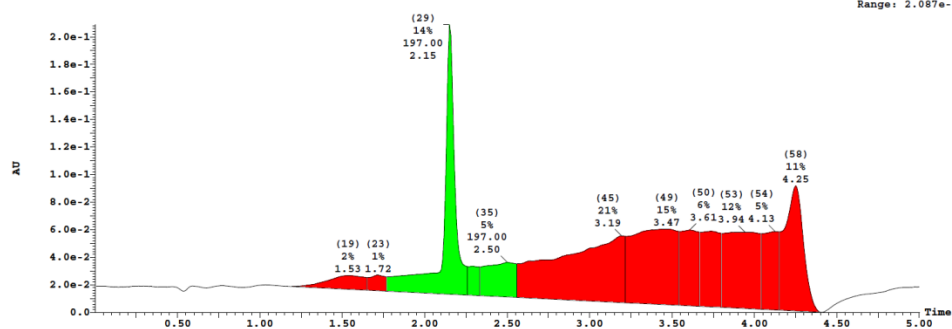

|                        |                      |                   |                                                                                  |                        |                      |
|------------------------|----------------------|-------------------|----------------------------------------------------------------------------------|------------------------|----------------------|
| Acquisition Time (sec) | 4.0894               | Comment           | OC_037_E_H1                                                                      | Date                   | 31 Jul 2014 05:07:28 |
| Date Stamp             | 31 Jul 2014 05:07:28 | File Name         | Vhesia\work\chemistry\NMR Files\NMR_data\OCox\140730_OC_001-037E\11-H1\data\111r |                        |                      |
| Frequency (MHz)        | 400.13               | Nucleus           | <sup>1</sup> H                                                                   | Number of Transients   | 16                   |
| Original Points Count  | 32768                | Owner             | sgcmr                                                                            | Points Count           | 65536                |
| Receiver Gain          | 194.71               | SW(cyclical) (Hz) | 8012.82                                                                          | Pulse Sequence         | zg30                 |
| Spectrum Offset (Hz)   | 2434.3870            | Solvent           | CHLOROFORM-d                                                                     | Sweep Width (Hz)       | 8012.70              |
|                        |                      | Spectrum Type     | STANDARD                                                                         | Temperature (degree C) | 25.152               |

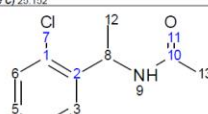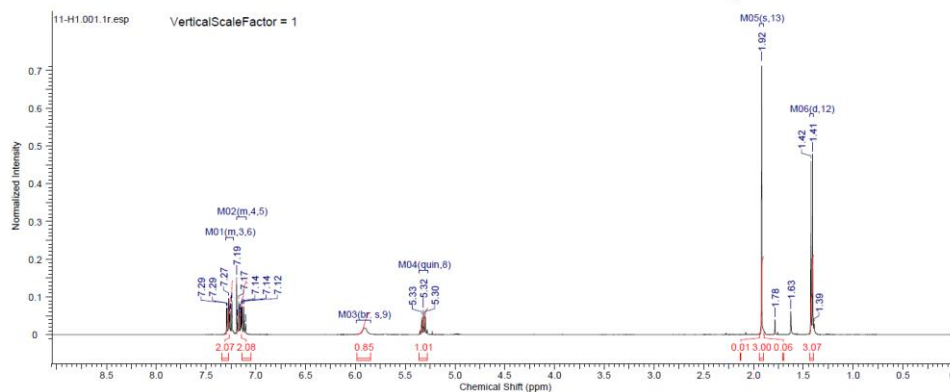

|                        |                      |                   |                                                                                   |                        |                      |
|------------------------|----------------------|-------------------|-----------------------------------------------------------------------------------|------------------------|----------------------|
| Acquisition Time (sec) | 1.3631               | Comment           | OC_037_E_C13                                                                      | Date                   | 31 Jul 2014 05:05:20 |
| Date Stamp             | 31 Jul 2014 05:05:20 | File Name         | Vhesia\work\chemistry\NMR Files\NMR_data\OCox\140730_OC_001-037E\10-C13\data\111r |                        |                      |
| Frequency (MHz)        | 100.61               | Nucleus           | <sup>13</sup> C                                                                   | Number of Transients   | 1024                 |
| Original Points Count  | 32768                | Owner             | sgcmr                                                                             | Points Count           | 32768                |
| Receiver Gain          | 194.71               | SW(cyclical) (Hz) | 24038.46                                                                          | Pulse Sequence         | jmod                 |
| Spectrum Offset (Hz)   | 10060.3320           | Solvent           | CHLOROFORM-d                                                                      | Sweep Width (Hz)       | 24037.73             |
|                        |                      | Spectrum Type     | APT                                                                               | Temperature (degree C) | 25.162               |

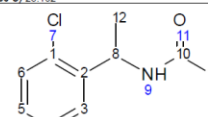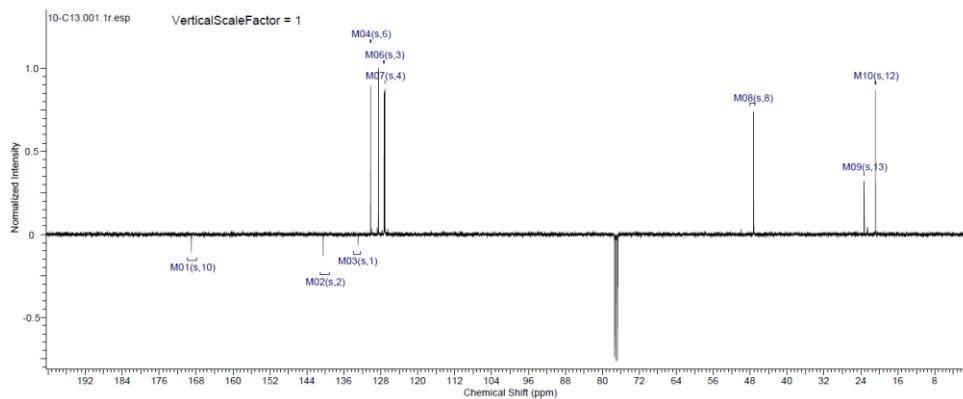



UV Detector: 254 Smooth (SG, 1x1)

7.539e-3  
Range: 7.522e-3

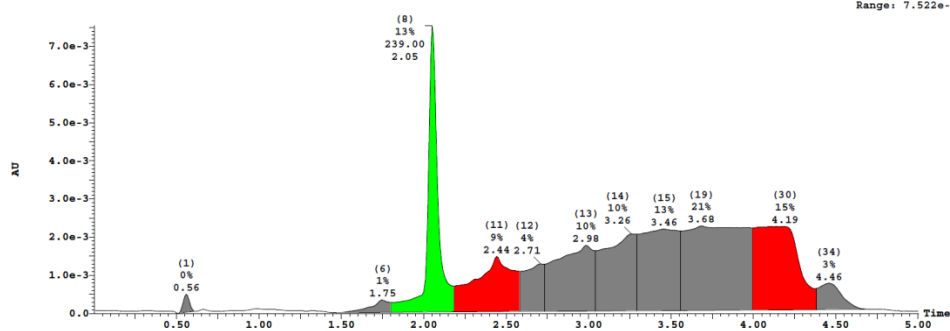

|                               |                      |                          |                |                               |                                                                                   |
|-------------------------------|----------------------|--------------------------|----------------|-------------------------------|-----------------------------------------------------------------------------------|
| <b>Acquisition Time (sec)</b> | 4.0894               | <b>Comment</b>           | OC_037_B_H1    | <b>Date</b>                   | 30 Jul 2014 23:06:56                                                              |
| <b>Date Stamp</b>             | 30 Jul 2014 23:06:56 |                          |                | <b>File Name</b>              | \\hesla\work\chemistry\NMR Files\NMR_data\OCox\140730_OC_001-037B2\1-H1\data\111r |
| <b>Frequency (MHz)</b>        | 400.13               | <b>Nucleus</b>           | <sup>1</sup> H | <b>Number of Transients</b>   | 16                                                                                |
| <b>Original Points Count</b>  | Cv1658               | <b>sgnmr</b>             |                | <b>Points Count</b>           | 16                                                                                |
| <b>Receiver Gain</b>          | 194.71               | <b>SW(cyclical) (Hz)</b> | 8012.82        | <b>Solvent</b>                | CHLOROFORM-d                                                                      |
| <b>Spectrum Offset (Hz)</b>   | 2434.9111            | <b>Spectrum Type</b>     | STANDARD       | <b>Sweep Width (Hz)</b>       | 8012.70                                                                           |
|                               |                      |                          |                | <b>Temperature (degree C)</b> | 25.151                                                                            |

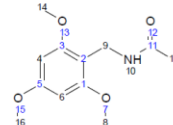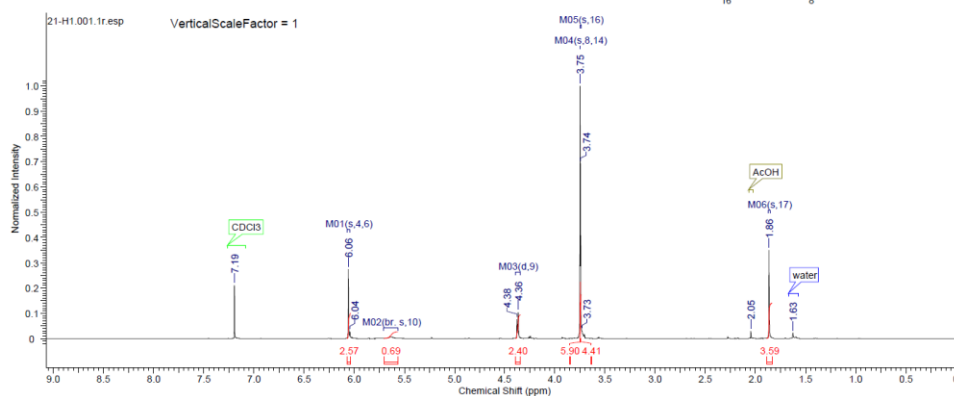

|                               |                      |                                  |                 |                             |              |                       |                      |
|-------------------------------|----------------------|----------------------------------|-----------------|-----------------------------|--------------|-----------------------|----------------------|
| <b>Acquisition Time (sec)</b> | 1.3631               | <b>Comment</b>                   | OC_037_B_C13    |                             |              | <b>Date</b>           | 30 Jul 2014 23:02:40 |
| <b>Start Stamp</b>            | 30 Jul 2014 23:02:40 |                                  |                 |                             |              |                       |                      |
| <b>Frequency (MHz)</b>        | 100.61               | <b>Nucleus</b>                   | <sup>13</sup> C | <b>Number of Transients</b> | 1024         | <b>Origin</b>         | Spect                |
| <b>Pulses per Count</b>       | 5988                 | <b>Gain</b>                      | 90cmr           | <b>Points Count</b>         | 32768        | <b>Temperature</b>    | mod                  |
| <b>Receiver Gain</b>          | 194.71               | <b><sup>1</sup>H(cycle) (Hz)</b> | 24330.46        | <b>Solvent</b>              | CHLOROFORM-d |                       |                      |
| <b>Spectrum Offset (Hz)</b>   | 10060.3320           | <b>Spectrum Type</b>             | APT             | <b>Sweep Width (Hz)</b>     | 24037.73     | <b>Pulse Sequence</b> | dennoe C1 25.160     |

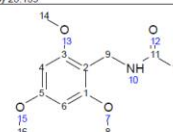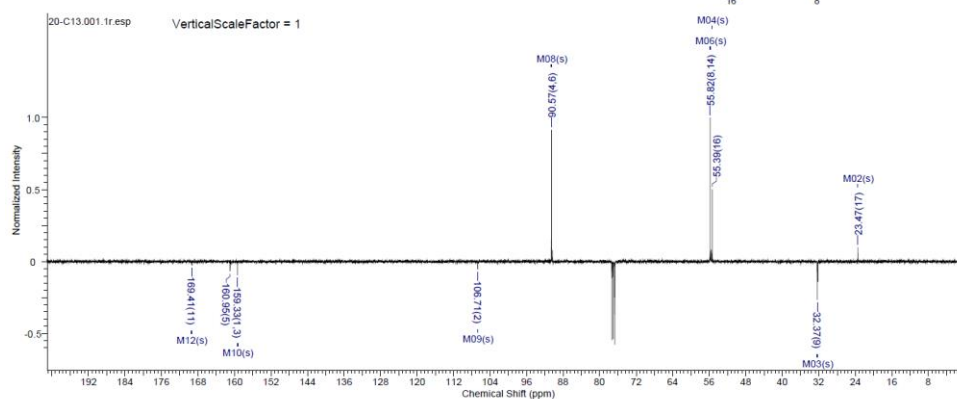

## Compound s35

UV Detector: TIC Smooth (S0, 1x1)

2.25e-1  
Range: 2.247e-1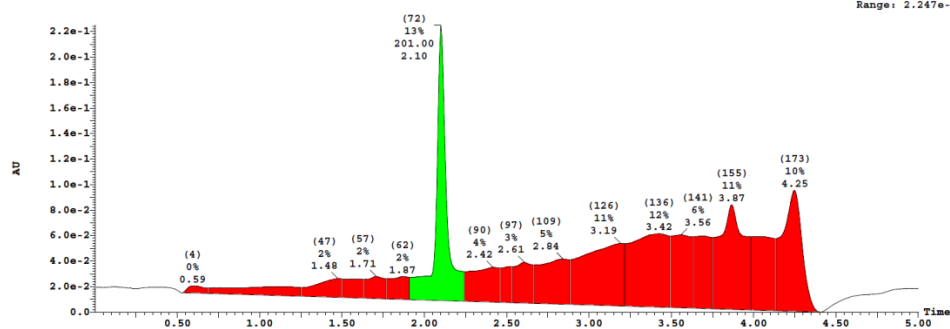

|                        |                      |                  |                                                          |                         |                      |
|------------------------|----------------------|------------------|----------------------------------------------------------|-------------------------|----------------------|
| Acquisition Time (sec) | 4.0894               | Comment          | OC_037_D_H1                                              | Date                    | 31 Jul 2014 03:08:00 |
| Date Stamp             | 31 Jul 2014 03:08:00 | File Name        | \\heslabwork\chemistry\NMR Files\NMR_data\OC037D_H1\111r |                         |                      |
| Frequency (MHz)        | 400.13               | Nucleus          | 1H                                                       | Number of Transients    | 16                   |
| Original Points Count  | 32768                | Owner            | sgow                                                     | Points Count            | 65536                |
| Receiver Gain          | 194.71               | SWH (Hz)         | 8012.82                                                  | Pulse Sequence          | zgpg30               |
| Spectrum Offset (Hz)   | 2435.1111            | Spectrum Type    | STANDARD                                                 | Solvent                 | CHLOROFORM-d         |
|                        |                      | Sweep Width (Hz) | 8012.79                                                  | Temperature (degrees C) | 25.152               |

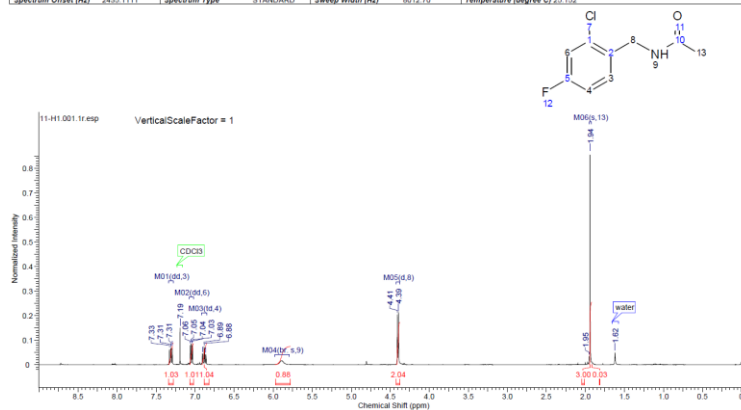

|                        |                      |                  |                                                           |                         |                      |
|------------------------|----------------------|------------------|-----------------------------------------------------------|-------------------------|----------------------|
| Acquisition Time (sec) | 1.3631               | Comment          | OC_037_D_C13                                              | Date                    | 31 Jul 2014 03:05:52 |
| Date Stamp             | 31 Jul 2014 03:05:52 | File Name        | \\heslabwork\chemistry\NMR Files\NMR_data\OC037D_C13\131r |                         |                      |
| Frequency (MHz)        | 100.61               | Nucleus          | 13C                                                       | Number of Transients    | 1024                 |
| Original Points Count  | 32768                | Owner            | sgow                                                      | Points Count            | 32768                |
| Receiver Gain          | 194.71               | SWH (Hz)         | 24938.45                                                  | Pulse Sequence          | zgpg30               |
| Spectrum Offset (Hz)   | 10059.3320           | Spectrum Type    | APT                                                       | Solvent                 | CHLOROFORM-d         |
|                        |                      | Sweep Width (Hz) | 24937.73                                                  | Temperature (degrees C) | 25.160               |

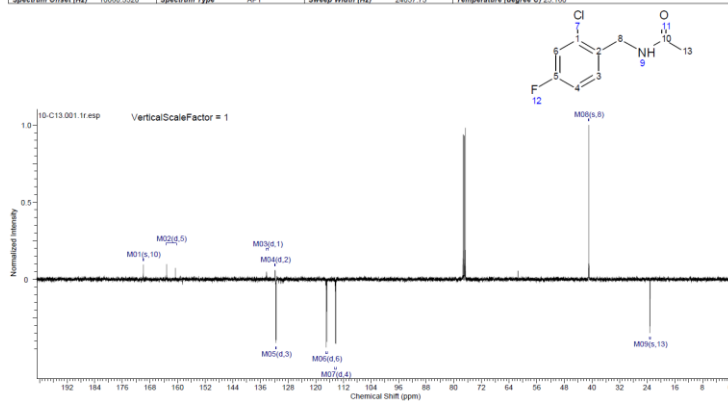

|                        |                      |                  |                                                           |                         |                      |
|------------------------|----------------------|------------------|-----------------------------------------------------------|-------------------------|----------------------|
| Acquisition Time (sec) | 0.7230               | Comment          | OC_037D_F19                                               | Date                    | 22 Aug 2014 17:35:16 |
| Date Stamp             | 22 Aug 2014 17:35:16 | File Name        | \\heslabwork\chemistry\NMR Files\NMR_data\OC037D_F19\191r |                         |                      |
| Frequency (MHz)        | 375.50               | Nucleus          | 19F                                                       | Number of Transients    | 16                   |
| Original Points Count  | 10448                | Owner            | sgow                                                      | Points Count            | 131072               |
| Receiver Gain          | 194.71               | SWH (Hz)         | 80031.71                                                  | Pulse Sequence          | zgpg30               |
| Spectrum Offset (Hz)   | 37649.6211           | Spectrum Type    | STANDARD                                                  | Solvent                 | CHLOROFORM-d         |
|                        |                      | Sweep Width (Hz) | 80035.03                                                  | Temperature (degrees C) | 25.161               |

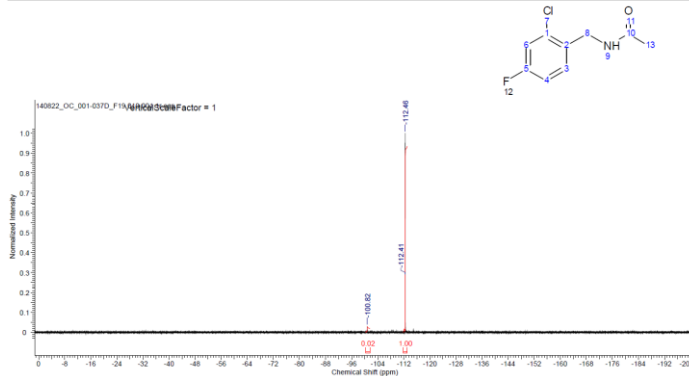

# Compound s36

UV Detector: TIC Smooth (SG, 1x1)

2.262e-1  
Range: 2.261e-1

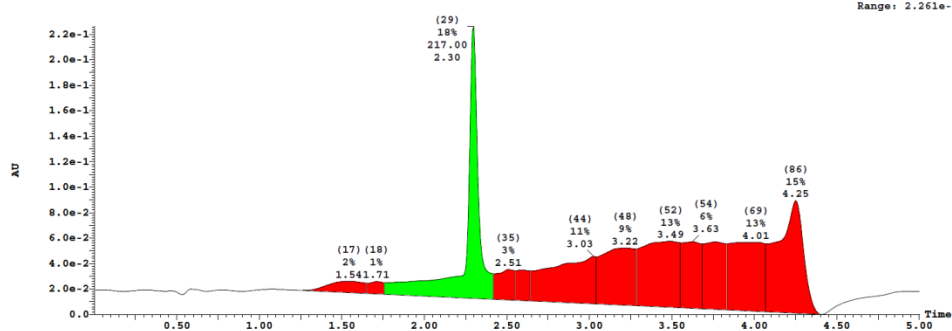

| Acquisition Time (sec) | Comment              | OC 037 C H1       | Date                                                                           | 31 Jul 2014 01:06:24          |
|------------------------|----------------------|-------------------|--------------------------------------------------------------------------------|-------------------------------|
| Date Stamp             | 31 Jul 2014 01:06:24 | File Name         | \hstia\work\chemistry\NMR Files\NMR_data\OCox140730_OC_001-037C\21-H1\data\11r |                               |
| Frequency (MHz)        | 400.13               | Nucleus           | <sup>1</sup> H                                                                 | Origin Spect                  |
| Original Points Count  | 32768                | Owner             | sgcnmr                                                                         | Points Count 65536            |
| Receiver Gain          | 194.71               | SW(cyclical) (Hz) | 8012.82                                                                        | Pulse Sequence zg30           |
| Spectrum Offset (Hz)   | 2434.6350            | Spectrum Type     | STANDARD                                                                       | Solvent CHLOROFORM-d          |
|                        |                      | Sweep Width (Hz)  | 8012.70                                                                        | Temperature (degree C) 25.155 |

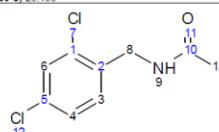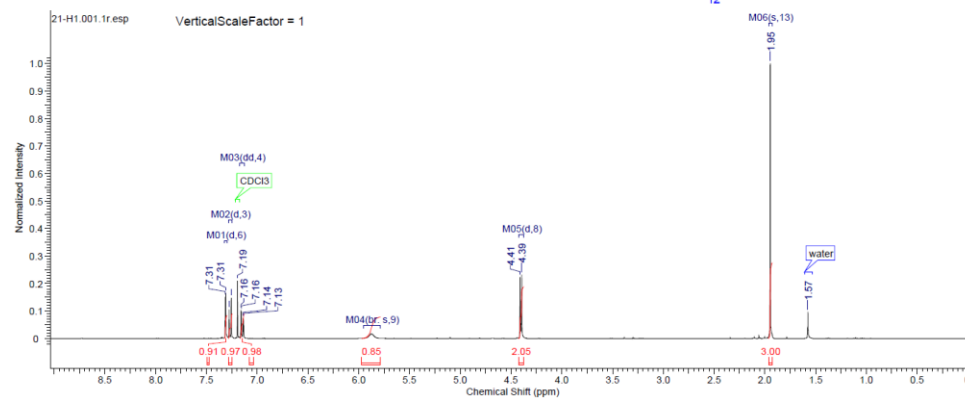

| Acquisition Time (sec) | Comment              | OC 037 C C13      | Date                                                                            | 31 Jul 2014 01:04:16          |
|------------------------|----------------------|-------------------|---------------------------------------------------------------------------------|-------------------------------|
| Date Stamp             | 31 Jul 2014 01:04:16 | File Name         | \hstia\work\chemistry\NMR Files\NMR_data\OCox140730_OC_001-037C\20-C13\data\11r |                               |
| Frequency (MHz)        | 100.61               | Nucleus           | <sup>13</sup> C                                                                 | Origin Spect                  |
| Original Points Count  | 32768                | Owner             | sgcnmr                                                                          | Points Count 32768            |
| Receiver Gain          | 194.71               | SW(cyclical) (Hz) | 24038.46                                                                        | Pulse Sequence jmod           |
| Spectrum Offset (Hz)   | 9991.2051            | Spectrum Type     | APT                                                                             | Solvent CHLOROFORM-d          |
|                        |                      | Sweep Width (Hz)  | 24037.73                                                                        | Temperature (degree C) 25.160 |

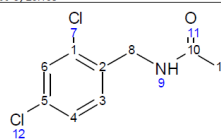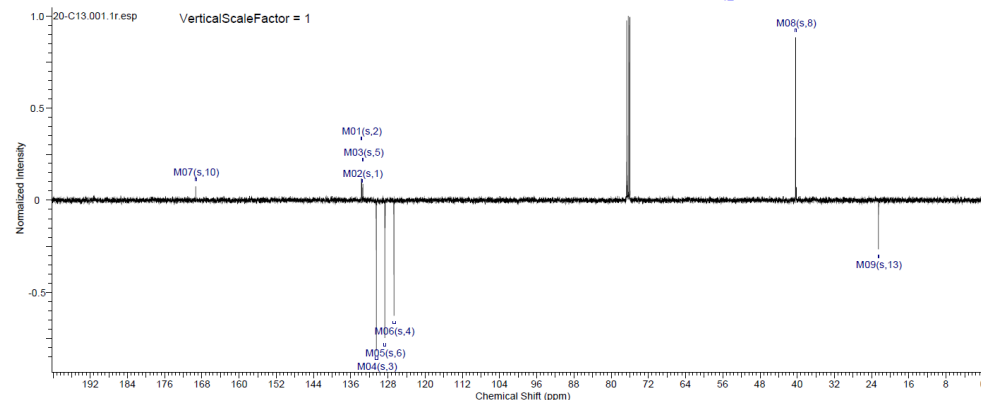

UV Detector: TIC Smooth (SG, 1x1)

1.102  
Range: 1.102

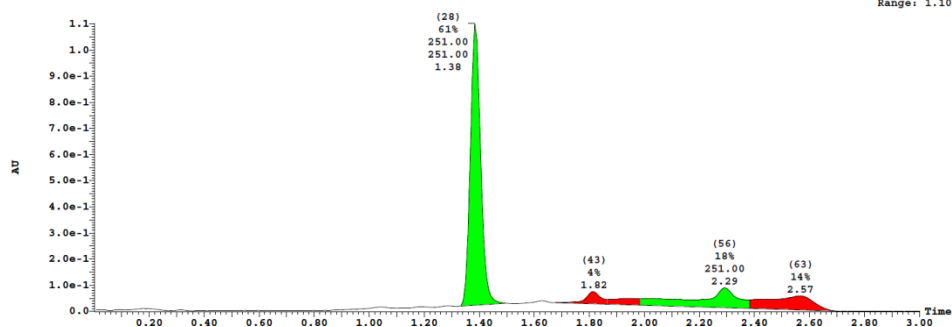

|                        |                      |                |                |                        |                                                                                 |
|------------------------|----------------------|----------------|----------------|------------------------|---------------------------------------------------------------------------------|
| Acquisition Time (sec) | 4.0894               | Comment        | OC_037_F_H1    | Date                   | 31-Jul-2014 07:09:04                                                            |
| Date/Time              | 31-Jul-2014 07:09:04 |                |                | File Name              | \\testshare\work\chemistry\BMR\BMR_data\OC06140730_OC_001-037F_H1-H1\data\11.vr |
| Frequency (MHz)        | 400.13               | Nucleus        | <sup>1</sup> H | Number of Transients   | 1                                                                               |
| Original Points/Count  | 32768                | Center         | gagame         | Points/Count           | 65536                                                                           |
| Receiver Gain          | 194.71               | SW (cycles/Hz) | 8012.82        | Solvent                | CHLOROFORM-d                                                                    |
| Spectrum Offset (Hz)   | 2434.1709            | STANDARD       |                | Solvent (Hz)           | 8012.70                                                                         |
|                        |                      |                |                | Temperature (degree C) | 25.150                                                                          |

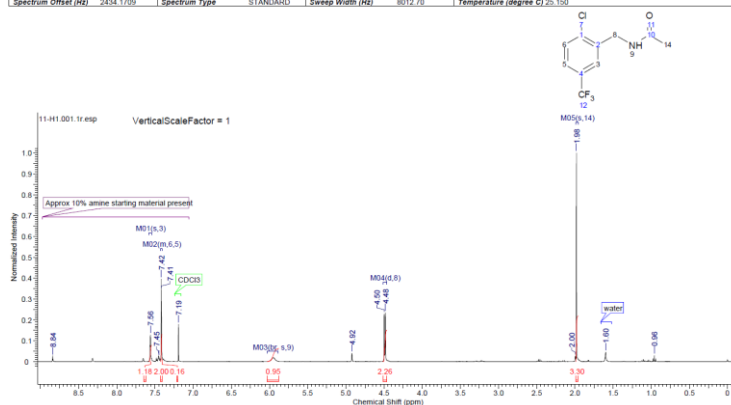

|                        |            |               |                 |                      |                                                                      |                        |                      |
|------------------------|------------|---------------|-----------------|----------------------|----------------------------------------------------------------------|------------------------|----------------------|
| Acquisition Time (sec) | 1.3631     | Comment       | OC_037_F_C13    | File Name            | 13cwork\chemstry\NMR File\NMR Data\OC140730_OC_001\037P1-C13\data11v | Date                   | 31 Jul 2014 07:04:40 |
| Frequency (MHz)        | 100.61     | Nucleus       | <sup>13</sup> C | Number of Transients | 1024                                                                 | Origin                 | Spec                 |
| Original Points Count  | 32768      | Gain          | 900000          | Points Count         | 32768                                                                | Process                | imod                 |
| Receiver Gain          | 721        | SWH (Hz)      | 24038.46        | Solvent              | CHLOROFORM-d                                                         | Pulse Sequence         |                      |
| Spectrum Offset (Hz)   | 10060.3330 | Spectrum Type | APT             | Solvent Width (Hz)   | 34037.3                                                              | Temperature (degree C) | 25.100               |

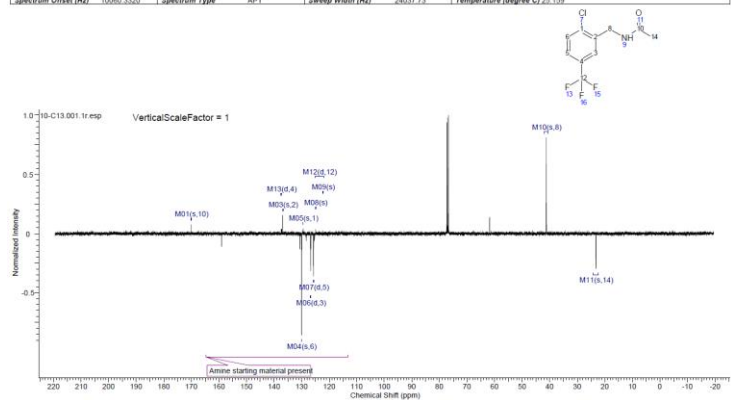

|                                   |                         |                                                                                  |
|-----------------------------------|-------------------------|----------------------------------------------------------------------------------|
| Acquisition Time (sec): 0.7330    | Comment: OC_03TF F19    | Date: 22 Aug 2016 17:39:24                                                       |
| Date Stamp: 22 Aug 2016 17:39:24  |                         | File Name: thebase\msdata\NMR Files\NMR_data\OC00140952_OC_001-03TF F19\data\111 |
| Frequency (MHz): 375.50           | Nucleus: <b>19F</b>     | Number of Transients: 1                                                          |
| Program/Event Name: 65444         | Owner: 131072           | Origin: Spect                                                                    |
| Receiver Gain: 194.71             | Solvent: CHLOROFORM-D   | Pulse Sequence: zgpg30                                                           |
| Spectrum Offset (Hz): -37549.6211 | Spectrum Type: STANDARD | Temperature (degrees C): 25.159                                                  |

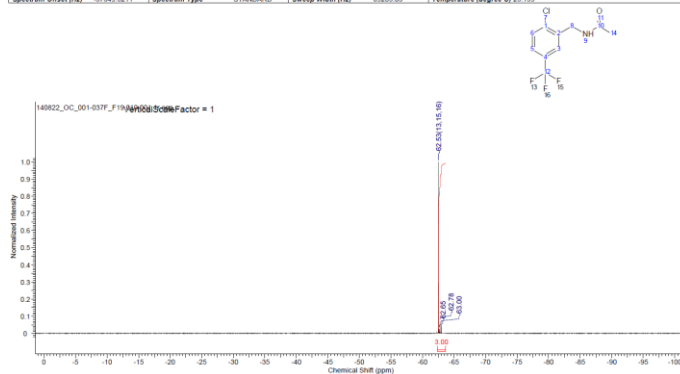

Compound **s39**

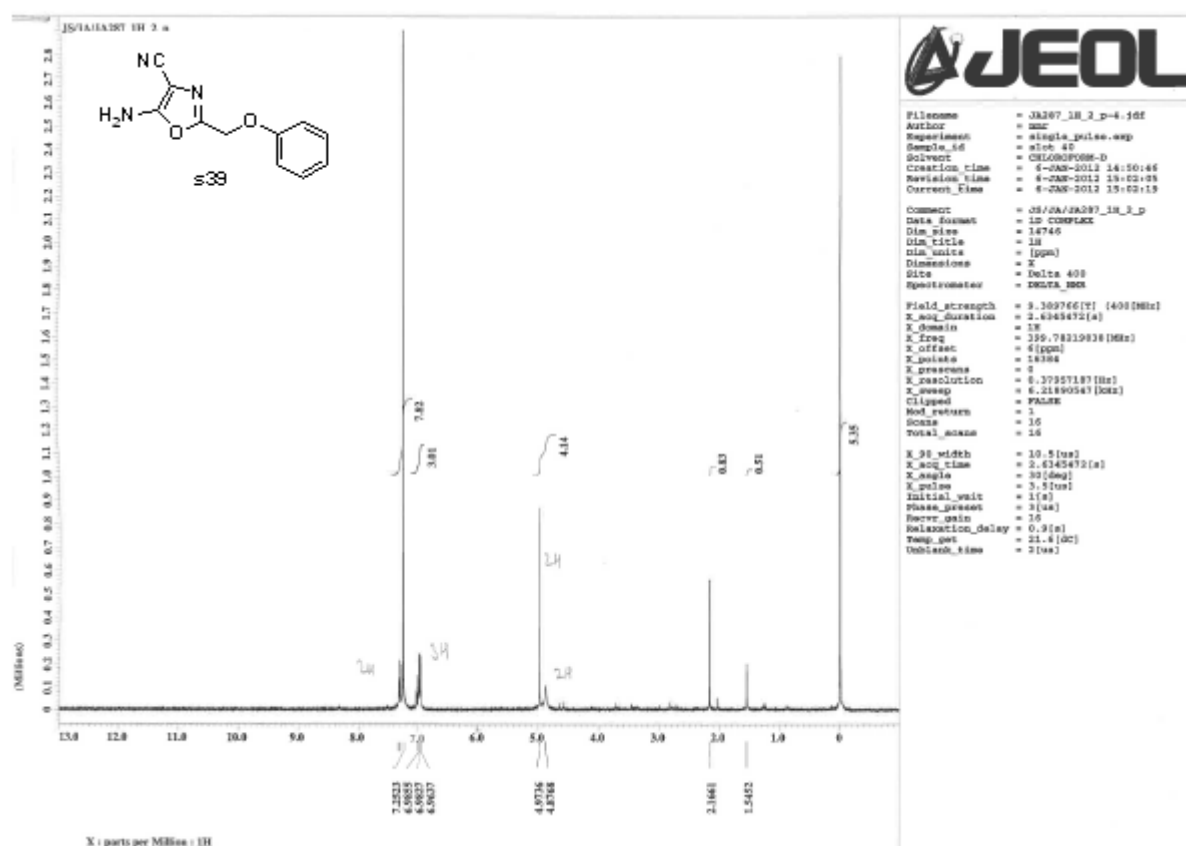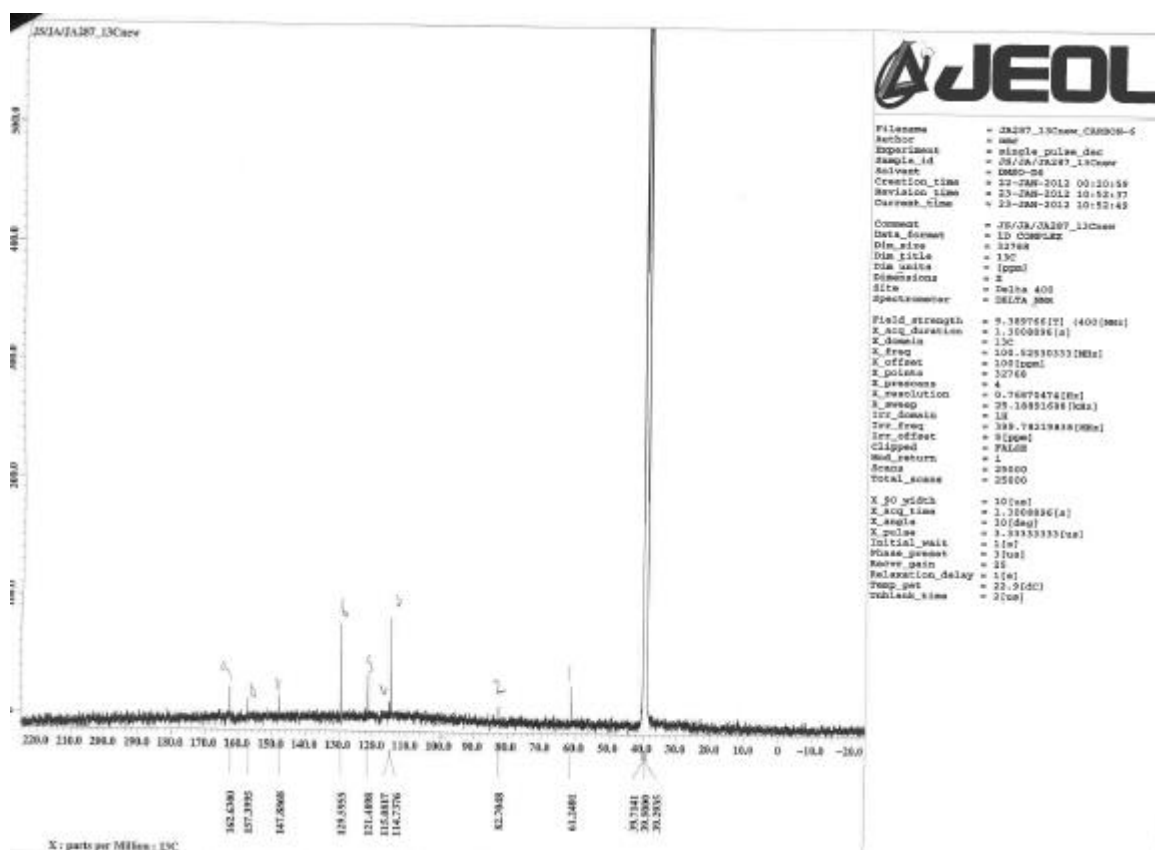

# Compound s40

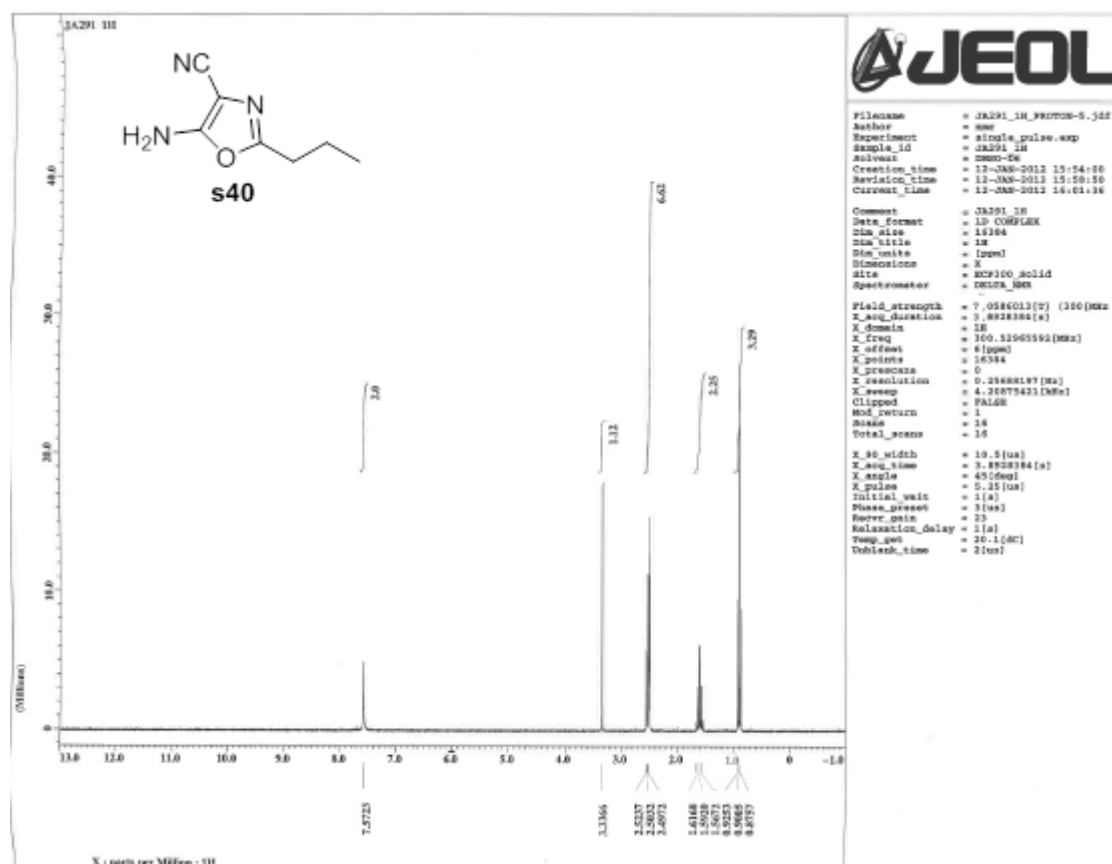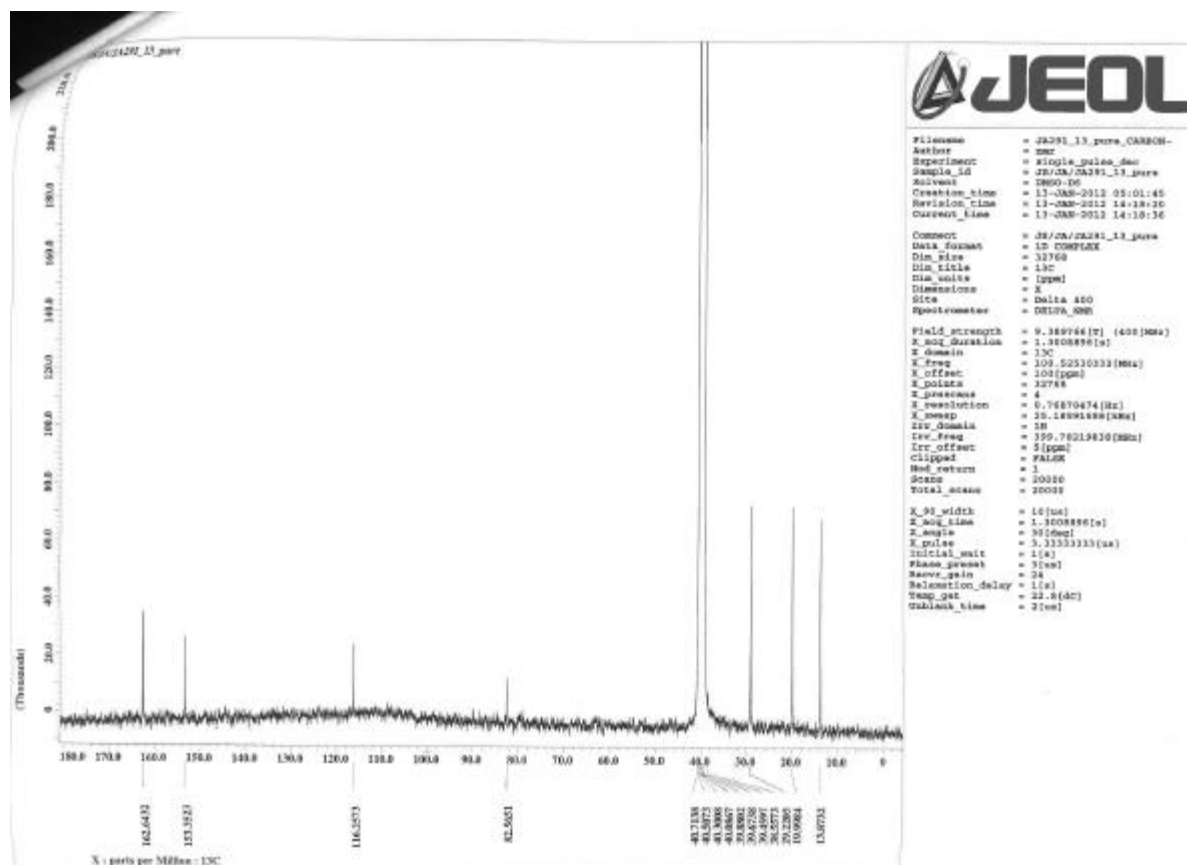

Compound **s46**

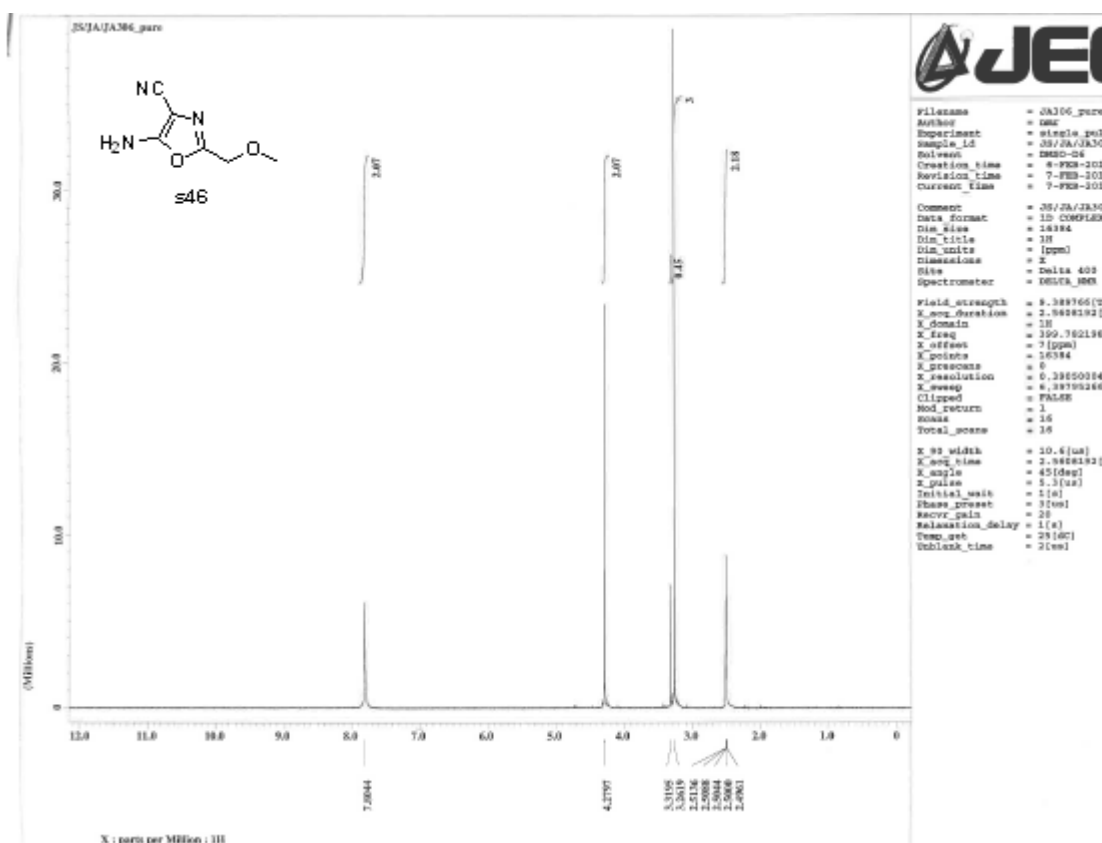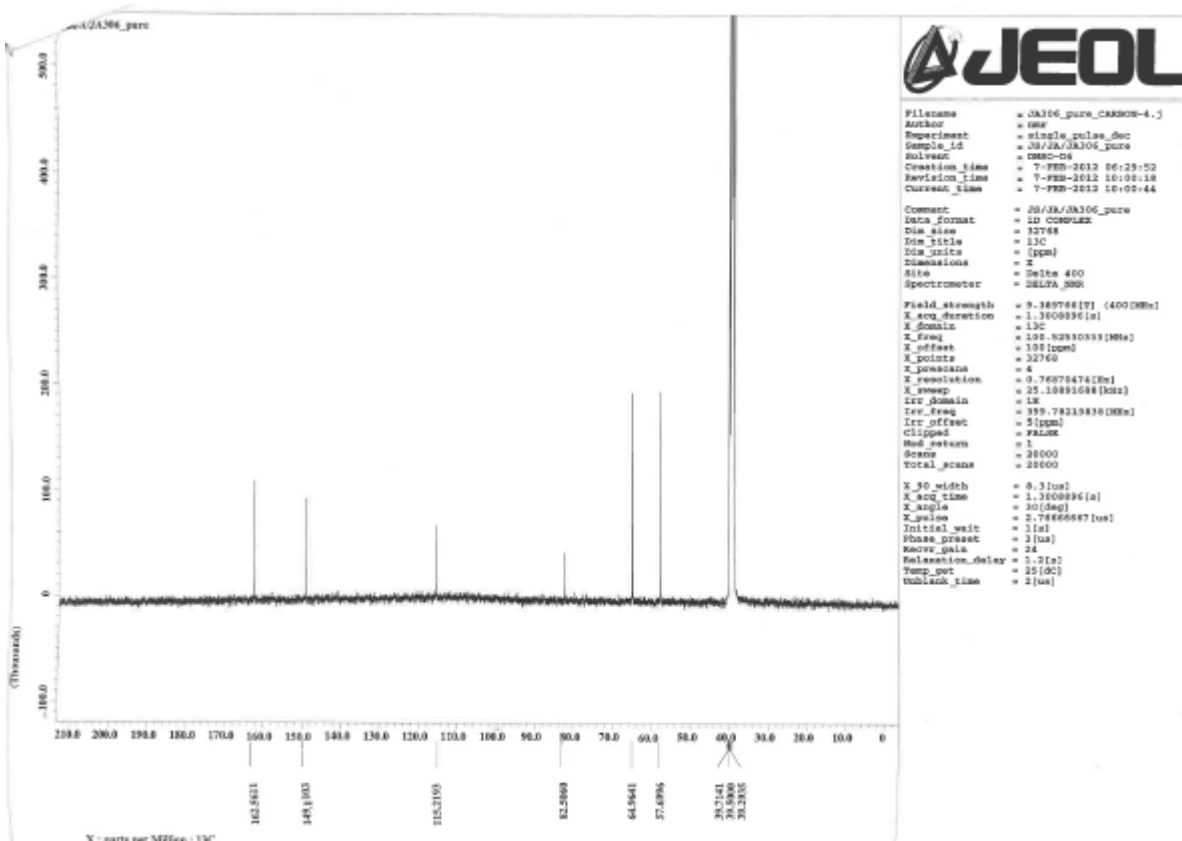

# Compound s47

(1) ELSD Signal Smooth (SG, 1x1)

7.759  
Range: 7.746

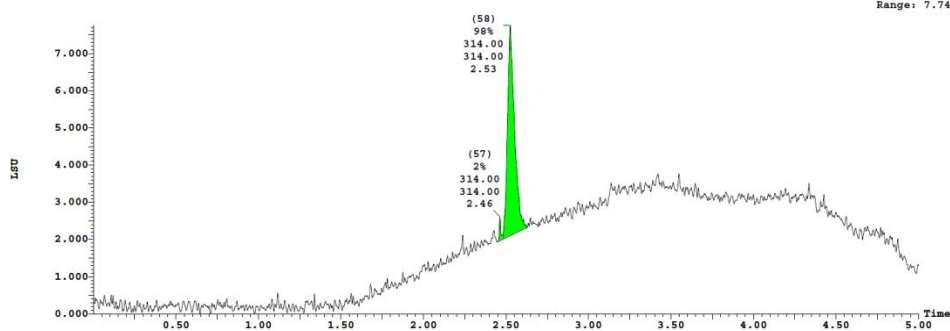

|                        |                      |                      |           |                      |                                                                              |                  |         |                        |         |
|------------------------|----------------------|----------------------|-----------|----------------------|------------------------------------------------------------------------------|------------------|---------|------------------------|---------|
| Acquisition Time (sec) | 4.0894               | Comment              | QC_058    | Date                 | 13 Jan 2015 17:44:32                                                         |                  |         |                        |         |
| Date Stamp             | 13 Jan 2015 17:44:32 |                      |           | File Name            | \\hestia\work\chemistry\NMR Files\NMR_data\OC\150113_OC_001-058\10\data\111r |                  |         |                        |         |
| Frequency (MHz)        | 400.13               | Nucleus              | 1H        | Number of Transients | 16                                                                           | Origin           | Spect   | Original Points Count  | 32768   |
| Owner                  | sgcmr                | Points Count         | 65536     | Pulse Sequence       | zg30                                                                         | Receiver Gain    | 155.34  | SW(cyclical) (Hz)      | 8012.82 |
| Solvent                | DMSO-d6              | Spectrum Offset (Hz) | 2470.9668 | Spectrum Type        | STANDARD                                                                     | Sweep Width (Hz) | 8012.70 | Temperature (degree C) | 25.156  |

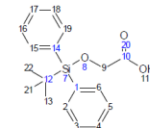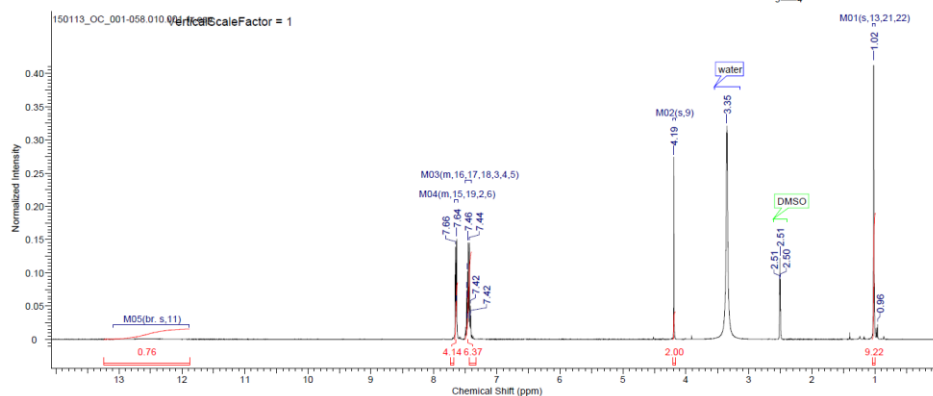

|                        |                      |                   |                 |                        |                                                                                  |
|------------------------|----------------------|-------------------|-----------------|------------------------|----------------------------------------------------------------------------------|
| Acquisition Time (sec) | 1.3631               | Comment           | QC 058 C13      | Date                   | 14 Jan 2015 09:27:44                                                             |
| Date Stamp             | 14 Jan 2015 09:27:44 |                   |                 | File Name              | \\hestia\work\chemistry\NMR Files\NMR_data\OC\150113_OC_001-058\11-C13\data\111r |
| Frequency (MHz)        | 100.61               | Nucleus           | <sup>13</sup> C | Number of Transients   | 1024                                                                             |
| Original Points Count  | 32768                | Owner             | sgcmr           | Points Count           | 32768                                                                            |
| Receiver Gain          | 194.71               | SW(cyclical) (Hz) | 24038.46        | Solvent                | DMSO-d6                                                                          |
| Spectrum Type          | APT                  | Sweep Width (Hz)  | 24037.73        | Temperature (degree C) | 25.164                                                                           |
|                        |                      |                   |                 | Pulse Sequence         | jmod                                                                             |
|                        |                      |                   |                 | Spectrum Offset (Hz)   | 10060.3320                                                                       |

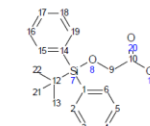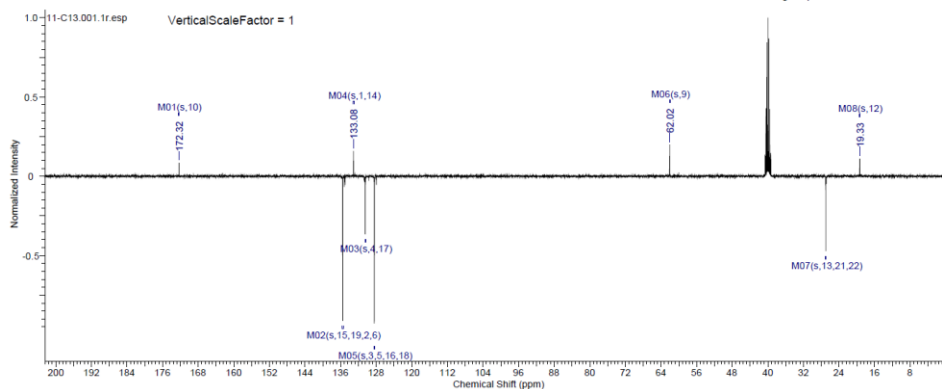



# Compound s48

(1) ELSD Signal Smooth (80, 1x1)

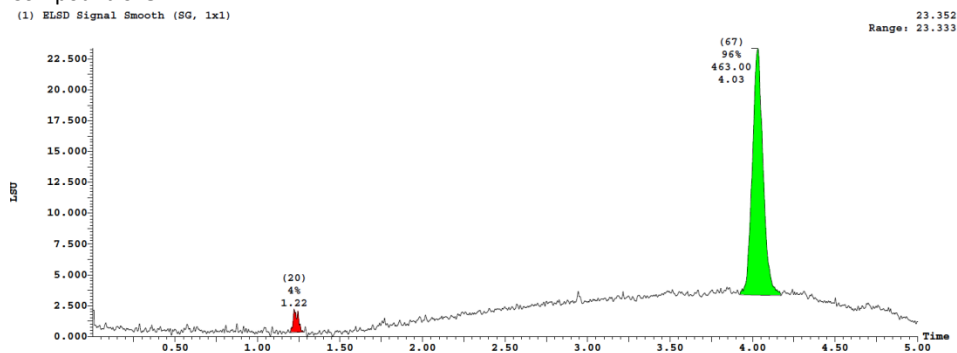

|                        |                      |                    |                                                                                 |                        |                      |
|------------------------|----------------------|--------------------|---------------------------------------------------------------------------------|------------------------|----------------------|
| Acquisition Time (sec) | 4.0894               | Comment            | OC_065                                                                          | Date                   | 21 Jan 2015 12:13:52 |
| Date Stamp             | 21 Jan 2015 12:13:52 | File Name          | \\heslata\work\chemistry\NMR Files\NMR_data\OCox\150121_OC_001-065\10\data\111r |                        |                      |
| Frequency (MHz)        | 400.13               | Nucleus            | <sup>1</sup> H                                                                  | Number of Transients   | 16                   |
| Original Points Count  | 32768                | Owner              | sgcnmr                                                                          | Points Count           | 65536                |
| Receiver Gain          | 194.71               | SW (cyclical) (Hz) | 8012.82                                                                         | Pulse Sequence         | zg30                 |
| Spectrum Offset (Hz)   | 2470.9668            | Spectrum Type      | STANDARD                                                                        | Solvent                | CHLOROFORM-d         |
|                        |                      | Sweep Width (Hz)   | 8012.70                                                                         | Temperature (degree C) | 25.156               |

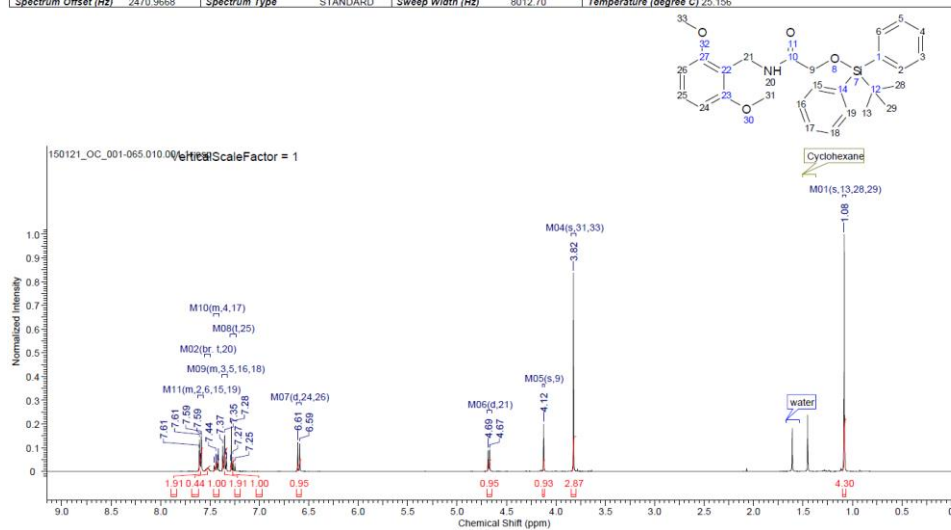

|                        |                      |                    |                                                                                     |                        |                      |
|------------------------|----------------------|--------------------|-------------------------------------------------------------------------------------|------------------------|----------------------|
| Acquisition Time (sec) | 1.3631               | Comment            | OC_065_C13                                                                          | Date                   | 21 Jan 2015 22:04:48 |
| Date Stamp             | 21 Jan 2015 22:04:48 | File Name          | \\heslata\work\chemistry\NMR Files\NMR_data\OCox\150121_OC_001-065\11-C13\data\111r |                        |                      |
| Frequency (MHz)        | 100.61               | Nucleus            | <sup>13</sup> C                                                                     | Number of Transients   | 1024                 |
| Original Points Count  | 32768                | Owner              | sgcnmr                                                                              | Points Count           | 32768                |
| Receiver Gain          | 194.71               | SW (cyclical) (Hz) | 24038.46                                                                            | Pulse Sequence         | jmod                 |
| Spectrum Offset (Hz)   | 10060.3320           | Spectrum Type      | APT                                                                                 | Solvent                | CHLOROFORM-d         |
|                        |                      | Sweep Width (Hz)   | 24037.73                                                                            | Temperature (degree C) | 25.298               |

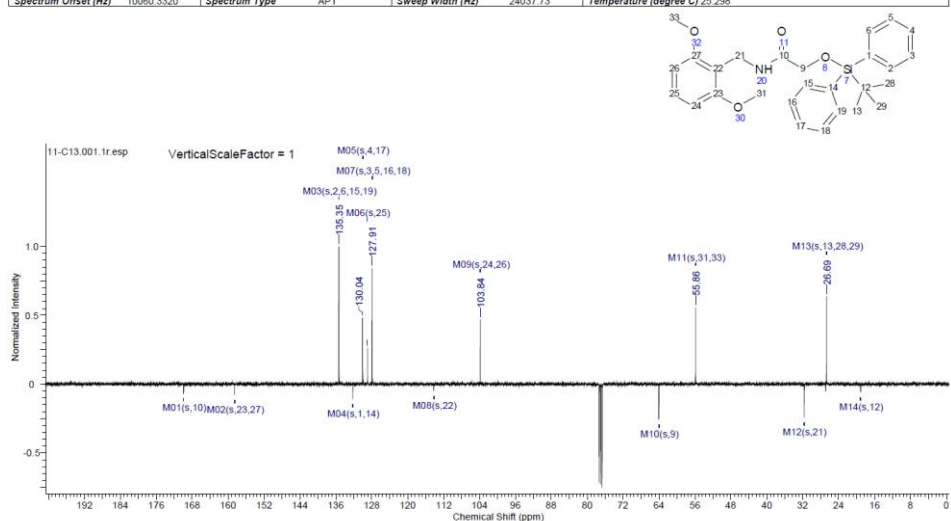

Supplement: c5sc03115j3.pdf [file c5sc03115j3.pdf]
